# Supplementary material for: Temperature during conidiation affects stress tolerance, pigmentation, and trypacidin accumulation in the conidia of the airborne pathogen Aspergillus fumigatus
Source: PLoS One. 2017 May 9;12(5):e0177050. doi: 10.1371/journal.pone.0177050 (PMC5423626; doi:10.1371/journal.pone.0177050)
Supplement: S1 Table — (XLSX) [file pone.0177050.s002.xlsx]

## Sheet: Table S1
Table S1, FPKM list of 8953 genes
	FPKM				Ratio
Gene ID	Conidia from 25	Conidia from 37	Conidia from 45		25/37	45/37	Annotation
AFUA_1G00120	63.4706	539.324	118.695		0.117685	0.220081	hypothetical protein
AFUA_1G00130	2.42599	18.7087	10.594		0.129672	0.566264	hypothetical protein
AFUA_1G00150	6.84754	2.61938	1.55742		2.61418	0.594577	IBR finger domain protein
AFUA_1G00210	14.5095	18.9598	27.4566		0.765277	1.44815	hypothetical protein
AFUA_1G00220	101.675	56.3536	111.894		1.80423	1.98556	conserved hypothetical protein
AFUA_1G00230	18.0353	18.4625	39.7857		0.976861	2.15495	hypothetical protein
AFUA_1G00250	1.59604	1.70949	4.64651		0.933637	2.71807	serine-rich protein, putative
AFUA_1G00270	9.8732	9.06427	21.1727		1.08924	2.33584	hypothetical protein
AFUA_1G00280	0.197235	1.47878	5.56259		0.133377	3.76161	hypothetical protein
AFUA_1G00310	0.562874	1.80865	3.5846		0.311212	1.98192	class V chitinase, putative
AFUA_1G00320	2.8474	1.82988	1.03619		1.55606	0.566264	hypothetical protein
AFUA_1G00330	1.86614	3.99758	6.79105		0.466819	1.69879	hypothetical protein
AFUA_1G00340	0.925949	3.96706	6.73921		0.233409	1.69879	hypothetical protein
AFUA_1G00350	13.9196	2.92855	12.4375		4.75306	4.24698	metalloreductase, putative
AFUA_1G00420	0.67639	0.965957	1.43584		0.700228	1.48644	carboxypeptidase S1, putative
AFUA_1G00440	6.88391	12.4582	32.3937		0.552561	2.60019	DUF895 domain membrane protein
AFUA_1G00450	20.8263	15.675	74.2525		1.32864	4.73701	N-acetylglucosamine-6-phosphate deacetylase (NagA), putative
AFUA_1G00470	51.9161	120.047	116.093		0.432464	0.967061	betaine aldehyde dehydrogenase, putative
AFUA_1G00480	190.613	437.592	854.035		0.435596	1.95167	glucosamine-6-phosphate deaminase, putative
AFUA_1G00490	67.1342	107.314	247.083		0.625584	2.30242	biotin-dependent 2-oxo acid dehydrogenases acyltransferase, putative
AFUA_1G00500	1946.78	291.601	408.993		6.67617	1.40258	FMN dependent dehydrogenase, putative
AFUA_1G00510	1050.08	2513.98	2073.33		0.417695	0.824723	D-lactate dehydrogenase (cytochrome), putative
AFUA_1G00520	18.5801	19.739	29.1347		0.94129	1.476	F-box domain protein
AFUA_1G00530	393.923	323.517	352.916		1.21763	1.09087	thermoresistant gluconokinase family protein
AFUA_1G00560	1.75288	3.37945	1.59472		0.518687	0.471886	Pfs domain protein
AFUA_1G00580	1.60207	1.71594	0.624648		0.933637	0.364027	transcriptional regulator PacG/VIB-1
AFUA_1G00610	184.761	125.834	91.3531		1.46828	0.725979	conserved hypothetical protein
AFUA_1G00630	13.1428	16.789	7.02057		0.782819	0.418164	SWI/SNF family DNA-dependent ATPase, putative
AFUA_1G00640	2.29485	3.51138	3.87732		0.653546	1.10421	choline kinase, putative
AFUA_1G00650	0.264846	0.567342	0.240949		0.466819	0.424698	extracellular alpha-1,3-glucanase/mutanase, putative
AFUA_1G00660	3.63898	5.19685	18.7603		0.700228	3.60993	hypothetical protein
AFUA_1G00670	5.05414	3.60892	16.8597		1.40046	4.67168	hypothetical protein
AFUA_1G00690	27.568	24.8031	27.087		1.11147	1.09208	hypothetical protein
AFUA_1G00700	38.7126	118.006	86.2271		0.328055	0.7307	hypothetical protein
AFUA_1G00720	12.5699	10.7707	9.72035		1.16705	0.902483	hypothetical protein
AFUA_1G00730	21.4709	5.92706	14.9019		3.62251	2.51421	DnaJ domain protein
AFUA_1G00740	0.356763	0.382121	8.43888		0.933637	22.0843	hypothetical protein
AFUA_1G00750	19.3539	24.3452	74.7299		0.794978	3.0696	conserved hypothetical protein
AFUA_1G00760	98.8742	199.795	269.859		0.494879	1.35068	conserved hypothetical protein
AFUA_1G00790	0.171206	0.550125	5.06213		0.311212	9.20179	hypothetical protein
AFUA_1G00800	1.23147	0.989248	0.280088		1.24485	0.283132	hypothetical protein
AFUA_1G00840	12.4557	100.16	169.106		0.124357	1.68835	hypothetical protein
AFUA_1G00850	13.9716	15.645	28.8886		0.893044	1.84651	hypothetical protein
AFUA_1G00890	11.8736	15.4634	26.0235		0.767851	1.68291	#N/A
AFUA_1G00910	145.922	124.924	103.752		1.16808	0.83052	conserved hypothetical protein
AFUA_1G00920	156.052	347.172	296.711		0.449493	0.85465	conserved hypothetical protein
AFUA_1G00930	194.782	982.882	318.589		0.198174	0.324137	hypothetical protein
AFUA_1G00950	1.48834	0.398531	2.36958		3.73455	5.94577	hypothetical protein
AFUA_1G00970	1.67309	2.9867	6.08853		0.560182	2.03855	MFS monocarboxylate transporter, putative
AFUA_1G00980	0.244063	1.04564	4.66287		0.233409	4.45933	FAD-dependent oxidase, putative
AFUA_1G00990	0.925949	2.47941	8.42401		0.373455	3.39758	short chain dehydrogenase/reductase family protein
AFUA_1G01000	1.57123	1.00975	4.28839		1.55606	4.24698	oxidoreductase, 2OG-Fe(II) oxygenase family
AFUA_1G01020	0.794884	68.0256	10.4858		0.0116851	0.154146	Pfs, NACHT and Ankyrin domain protein
AFUA_1G01040	20.663	11.4757	18.4504		1.80059	1.60778	Pfs domain protein
AFUA_1G01050	35.9405	43.7445	60.1934		0.821601	1.37602	conserved hypothetical protein
AFUA_1G01070	1.73285	4.64004	39.4123		0.373455	8.49396	conserved hypothetical protein
AFUA_1G01080	2.36297	1.68729	42.2787		1.40046	25.0572	conserved hypothetical protein
AFUA_1G01090	0.787658	1.68729	19.7062		0.466819	11.6792	conserved hypothetical protein
AFUA_1G01100	7.04643	2.15637	10.5318		3.26773	4.88402	fungal specific transcription factor, putative
AFUA_1G01140	4.79444	2.56761	4.79802		1.86727	1.86867	conserved hypothetical protein
AFUA_1G01160	45.0481	13.9438	42.1114		3.23068	3.02007	5'-nucleotidase, putative
AFUA_1G01175	2398.72	2329.52	1599.71		1.02971	0.686714	conserved hypothetical protein
AFUA_1G01180	14.8398	31.3285	68.2868		0.473684	2.1797	isoamyl alcohol oxidase, putative
AFUA_1G01190	0.64693	7.27559	17.0682		0.0889178	2.34595	conserved hypothetical protein
AFUA_1G01230	0.912025	8.05902	11.8237		0.113168	1.46714	beta-xylosidase
AFUA_1G01240	6.26155	4.99097	17.3547		1.25458	3.47721	C6 transcription factor, putative
AFUA_1G01250	9.89321	6.9107	11.5442		1.43158	1.67048	glucuronyl hydrolase, putative
AFUA_1G01270	5.73415	4.48819	4.01289		1.27761	0.894101	cytochrome P450 monooxygenase, putative
AFUA_1G01320	5.70529	0.797063	3.38511		7.15789	4.24698	endo-polygalacturonase, putative
AFUA_1G01330	9.72246	12.3971	24.4296		0.784255	1.9706	oxidoreductase, short-chain dehydrogenase/reductase family
AFUA_1G01340	8.49095	17.9291	28.6922		0.473584	1.60031	C6 transcription factor, putative
AFUA_1G01350	423.083	226.578	183.391		1.86727	0.809396	conserved hypothetical protein
AFUA_1G01360	272.673	100.931	162.796		2.70159	1.61295	conserved hypothetical protein
AFUA_1G01370	102.261	106.617	154.397		0.959147	1.44815	glutathione S-transferase, putative
AFUA_1G01380	3.57932	9.37137	31.1164		0.381943	3.32036	alpha-1,6-mannosyltransferase subunit (Hoc1), putative
AFUA_1G01390	5.83465	11.8409	12.8514		0.492753	1.08534	hypothetical protein
AFUA_1G01400	5.43131	17.4521	13.1767		0.311212	0.755018	hypothetical protein
AFUA_1G01410	15.3096	14.1274	7.49982		1.08369	0.530872	hypothetical protein
AFUA_1G01430	1.78054	0.238388	1.01243		7.4691	4.24698	AMP-binding enzyme, putative
AFUA_1G01450	5.1739	0.923611	4.96857		5.60182	5.37951	toxin biosynthesis protein, putative
AFUA_1G01460	9.95741	51.3868	16.8826		0.193774	0.32854	Zn-dependent hydrolases of the beta-lactamase fold, putative
AFUA_1G01480	8.63091	10.4936	22.9198		0.82249	2.18416	POT peptide transporter, putative
AFUA_1G01490	1430.15	977.632	707.454		1.46287	0.72364	NACHT domain protein
AFUA_1G01500	155.956	288.714	217.79		0.540176	0.754344	short-chain dehydrogenase/reductase family protein, putative
AFUA_1G01520	0.670162	5.02458	17.0714		0.133377	3.39758	conserved hypothetical protein
AFUA_1G01550	163.417	158.793	228.986		1.02912	1.44204	high affinity zinc ion transporter, putative
AFUA_1G01560	75.662	35.3746	65.1929		2.13888	1.84293	C6 finger domain protein, putative
AFUA_1G01570	7.95405	9.22938	14.4727		0.861819	1.56811	hypothetical protein
AFUA_1G01580	9.33072	9.99394	8.48881		0.933637	0.849396	hypothetical protein
AFUA_1G01590	10.9878	10.8397	24.3332		1.01366	2.24483	C6 transcription factor, putative
AFUA_1G01600	457.301	1338.17	446.682		0.341737	0.333801	deoxyribodipyrimidine photo-lyase Phr1, putative
AFUA_1G01610	63.1618	56.5042	94.6829		1.11782	1.67568	conserved hypothetical protein
AFUA_1G01620	2.3538	1.68074	3.28351		1.40046	1.95361	conserved hypothetical protein
AFUA_1G01630	12.4669	4.33071	4.29156		2.87872	0.990961	oxidoreductase CipA-like, putative
AFUA_1G01640	9.79929	6.8081	13.0112		1.43936	1.91114	kinesin family protein
AFUA_1G01650	3.23073	2.83121	8.28327		1.14111	2.9257	C6 finger domain protein, putative
AFUA_1G01660	17.0213	10.5549	17.4416		1.61265	1.65246	alpha-L-rhamnosidase A, putative
AFUA_1G01670	38.182	53.6934	67.347		0.711112	1.25429	formaldehyde dehydrogenase, putative
AFUA_1G01680	80.1214	31.1127	79.5714		2.5752	2.55752	branched-chain amino acid aminotransferase
AFUA_1G01690	25.7732	10.8901	21.9418		2.36666	2.01485	cytochrome P450 alkane hydroxylase, putative
AFUA_1G01700	10.7951	3.85412	10.5602		2.80091	2.73999	conserved serine-rich protein
AFUA_1G01720	10.5071	10.5853	31.5163		0.992604	2.97735	protein kinase and ribonuclease Ire1, putative
AFUA_1G01730	10.5938	5.95709	10.6017		1.77836	1.77969	glycosyl hydrolase, putative
AFUA_1G01740	43.4765	40.9787	95.7197		1.06095	2.33584	t-complex protein 1, beta subunit, putative
AFUA_1G01750	11.185	11.1538	27.5448		1.0028	2.46954	peptidyl-prolyl cis-trans isomerase, putative
AFUA_1G01760	33.3059	27.3055	77.0611		1.21975	2.82219	integral membrane protein
AFUA_1G01770	112.361	77.4969	90.2197		1.44988	1.16417	short chain oxidoreductase/dehydrogenase, putative
AFUA_1G01780	26.9554	57.7428	64.5348		0.466819	1.11763	alcohol dehydrogenase, putative
AFUA_1G01790	9.28869	8.77846	45.2354		1.05812	5.153	conserved hypothetical protein
AFUA_1G01812	4.50134	2.28377	8.19037		1.97101	3.58634	#N/A
AFUA_1G01820	0.28474	0.304979	4.66287		0.933637	15.2891	conserved hypothetical protein
AFUA_1G01830	33.6532	64.9606	34.654		0.518055	0.533462	thiamin pyrophosphokinase, putative
AFUA_1G01850	72.6352	15.3121	15.3708		4.74363	1.00383	C6 finger domain protein, putative
AFUA_1G01860	25.0456	13.6759	17.4244		1.83137	1.27409	integral membrane protein, putative
AFUA_1G01870	73.3665	53.4353	93.8903		1.373	1.75708	presequence translocase-associated motor subunit Pam17, putative
AFUA_1G01890	7.29331	4.93372	17.4612		1.47826	3.53915	enoyl-CoA hydratase/isomerase family protein
AFUA_1G01900	11.2044	9.91367	29.6938		1.13019	2.99524	dienelactone hydrolase family protein
AFUA_1G01910	0.568147	1.21706	7.75325		0.466819	6.37047	integral membrane protein
AFUA_1G01920	3.01573	5.02458	10.0599		0.600195	2.00215	plasma membrane protein Pth11-like, putative
AFUA_1G01930	3.47231	3.71912	8.84521		0.933637	2.37831	MFS multidrug transporter, putative
AFUA_1G01940	25.7795	25.5773	31.6004		1.0079	1.23548	conserved hypothetical protein
AFUA_1G01950	57.5049	55.818	102.18		1.03022	1.83059	conserved hypothetical protein
AFUA_1G01960	13.8918	13.4276	38.5316		1.03457	2.86958	conserved hypothetical protein
AFUA_1G01970	340.793	138.655	213.599		2.45784	1.5405	VeA-like protein
AFUA_1G01980	3039.22	31.0367	34.3325		97.9234	1.10619	IgE binding protein, putative
AFUA_1G01990	13.6344	10.0714	33.363		1.35377	3.31264	ribosome biogenesis protein Rsa4, putative
AFUA_1G02000	3.46157	4.9435	22.7008		0.700228	4.59204	DNA mismatch repair protein Msh4, putative
AFUA_1G02010	52.5784	41.6604	75.8075		1.26207	1.81965	C2H2 finger domain protein, putative
AFUA_1G02020	32.8519	22.1047	55.5604		1.4862	2.51352	SWIB/MDM2 domain protein
AFUA_1G02030	33.3941	33.3131	66.5701		1.00243	1.99831	eukaryotic translation initiation factor 3 subunit EifCb, putative
AFUA_1G02040	997.606	212.913	273.998		4.68552	1.2869	extracellular SCP domain protein Pry1, putative
AFUA_1G02050	25.9829	17.4302	24.5094		1.49068	1.40614	secretion pathway protein Sls2/Rcy1, putative
AFUA_1G02060	6.91619	6.26813	9.92223		1.10339	1.58296	pachytene checkpoint component Pch2, putative
AFUA_1G02070	101.209	133.981	189.672		0.755398	1.41566	cytochrome C1/Cyt1, putative
AFUA_1G02080	65.315	52.3016	101.866		1.24881	1.94766	conserved hypothetical protein
AFUA_1G02090	738.982	243.743	235.974		3.03181	0.968128	quinone oxidoreductase, putative
AFUA_1G02100	9.08231	3.78306	10.7417		2.40078	2.83941	conserved hypothetical protein
AFUA_1G02110	38.9316	45.8343	66.4469		0.849399	1.44972	Phe-inhibited DAHP synthase AroG
AFUA_1G02120	76.6461	38.6649	23.6585		1.98232	0.611887	F-box domain protein
AFUA_1G02130	42.0775	118.576	86.858		0.354856	0.732506	DUF221 domain protein, putative
AFUA_1G02140	45.8727	15.1427	22.2351		3.02936	1.46837	glycogen debranching enzyme Gdb1, putative
AFUA_1G02150	103.846	61.3777	111.148		1.69192	1.81089	glycerol 3-phosphate dehydrogenase (GfdA), putative
AFUA_1G02160	92.7888	114.93	170.248		0.807348	1.48131	conserved hypothetical protein
AFUA_1G02170	57.8972	52.8631	98.4383		1.09523	1.86214	ATP-dependent Clp protease, putative
AFUA_1G02180	24.9106	7.62321	12.3952		3.26773	1.62599	Chromo domain protein Chp1p, putative
AFUA_1G02190	153.251	260.476	347.213		0.588351	1.33299	Ras GTPase Rab11, putative
AFUA_1G02200	23.0401	57.3395	135.015		0.401819	2.35465	F-box domain protein
AFUA_1G02210	13.1917	15.5078	32.7844		0.850647	2.11405	60S ribosome biogenesis protein Brx1, putative
AFUA_1G02220	25.6595	6.24621	10.611		4.108	1.69879	hypothetical protein
AFUA_1G02230	10.6137	4.87205	6.20744		2.17849	1.27409	conserved hypothetical protein
AFUA_1G02270	0.465939	2.49529	4.09767		0.186727	1.64216	ARS binding protein Abp2, putative
AFUA_1G02280	34.5832	29.3014	58.2296		1.18026	1.98727	conserved hypothetical protein
AFUA_1G02290	86.1565	57.0682	101.072		1.50971	1.77108	conserved hypothetical protein
AFUA_1G02320	4.7465	1.69462	11.5153		2.80091	6.79516	conserved hypothetical protein
AFUA_1G02330	82.7222	100.103	161.371		0.826368	1.61204	conserved hypothetical protein
AFUA_1G02340	47.4294	47.2972	69.9325		1.0028	1.47858	conserved hypothetical protein
AFUA_1G02350	1.55512	2.85541	5.25498		0.544622	1.84036	MFS transporter, putative
AFUA_1G02360	4.91983	9.26711	21.9166		0.530892	2.36498	C2H2 type zinc finger domain protein
AFUA_1G02370	3.32327	3.55949	10.9599		0.933637	3.07906	fumarylacetoacetate hydrolase family protein
AFUA_1G02380	2.03864	1.09178	14.8376		1.86727	13.5903	conserved hypothetical protein
AFUA_1G02390	9.54563	5.98486	16.0978		1.59496	2.68975	alpha/beta hydrolase, putative
AFUA_1G02400	4.44117	4.75684	15.2779		0.933637	3.21178	conserved hypothetical protein
AFUA_1G02410	46.4551	38.4235	95.0927		1.20903	2.47486	AAA family ATPase Rvb2/Reptin, putative
AFUA_1G02420	36.975	67.5249	94.8662		0.547576	1.40491	conserved hypothetical protein
AFUA_1G02430	72.4645	106.637	169.401		0.679546	1.58858	ubiquitin fusion degradation protein Ufd1, putative
AFUA_1G02440	9.29821	10.4118	15.3804		0.893044	1.47721	indole-diterpene biosynthesis protein PaxU, putative
AFUA_1G02450	24.9189	25.5872	27.7291		0.97388	1.08371	conserved hypothetical protein
AFUA_1G02460	10.2009	16.9839	19.5716		0.60062	1.15236	DNA-directed RNA polymerase III, beta subunit, putative
AFUA_1G02480	14.1516	11.2328	22.0709		1.25985	1.96487	P-type ATPase, putative
AFUA_1G02490	105.519	93.5937	94.2835		1.12741	1.00737	conserved hypothetical protein
AFUA_1G02500	8.50438	13.1839	29.3193		0.645059	2.22387	origin recognition complex subunit Orc5, putative
AFUA_1G02510	6.6184	7.57772	20.9705		0.873403	2.76739	RNA-binding protein, putative
AFUA_1G02530	19.4945	5.92895	10.7289		3.28803	1.80958	MFS sugar transporter, putative
AFUA_1G02540	61.7576	31.4742	68.5443		1.96217	2.17779	EF hand domain protein
AFUA_1G02550	6.48371	5.20842	19.4165		1.24485	3.7279	tubulin alpha-1 subunit
AFUA_1G02560	111.748	57.7996	106.01		1.93337	1.83409	conserved hypothetical protein
AFUA_1G02570	176.703	65.0977	108.608		2.71443	1.66839	aspartyl-tRNA synthetase, cytoplasmic
AFUA_1G02580	130.218	20.6345	44.791		6.3107	2.17068	lipase, putative
AFUA_1G02590	7.98469	15.4668	21.4836		0.516247	1.38901	RNA polymerase I specific transcription initiation factor RRN3 superfamily
AFUA_1G02600	188.901	1642.25	735.842		0.115026	0.448071	conserved hypothetical protein
AFUA_1G02610	50.9755	33.0781	63.3015		1.54106	1.9137	rRNA processing protein, putative
AFUA_1G02620	95.6399	42.4743	109.647		2.25171	2.5815	conserved hypothetical protein
AFUA_1G02630	14.0734	9.80989	29.0621		1.43461	2.96253	rRNA processing protein Pwp1, putative
AFUA_1G02640	26.7052	33.428	75.8138		0.798886	2.26797	conserved hypothetical protein
AFUA_1G02650	15.9852	14.3518	22.6697		1.11381	1.57958	conserved hypothetical protein
AFUA_1G02660	2.29485	1.75569	9.54417		1.30709	5.43613	F-box domain protein
AFUA_1G02670	89.1796	79.3289	168.11		1.12418	2.11916	ARP2/3 complex 34 kDa subunit , putative
AFUA_1G02680	11.7543	13.4983	30.9786		0.870796	2.295	small nucleolar ribonucleoprotein complex subunit Dip2, putative
AFUA_1G02700	8.47634	15.027	37.4939		0.564073	2.4951	zinc metallopeptidase, putative
AFUA_1G02710	70.541	69.7002	89.7519		1.01206	1.28768	conserved hypothetical protein
AFUA_1G02720	6.31298	11.1085	20.1018		0.568301	1.80958	conserved hypothetical protein
AFUA_1G02750	0.685307	3.67009	2.49389		0.186727	0.679516	hypothetical protein
AFUA_1G02760	14.1008	17.3343	26.5317		0.813466	1.53059	cell cycle inhibitor Nif1, putative
AFUA_1G02770	13.2729	8.68774	33.207		1.52777	3.82228	conserved hypothetical protein
AFUA_1G02780	12.4491	17.4368	45.8842		0.713958	2.63146	L-asparaginase
AFUA_1G02800	49.2371	31.4326	101.752		1.56644	3.23714	class V chitinase, putative
AFUA_1G02810	24.7355	60.1204	117.711		0.411433	1.95793	mRNA cleavage and polyadenylation specificity factor complex subunit, putative
AFUA_1G02820	348.438	161.128	1406.48		2.1625	8.72897	NADH-quinone oxidoreductase Pst2, putative
AFUA_1G02830	99.0085	133.701	92.9479		0.740519	0.69519	endoplasmic reticulum and nuclear membrane proteinc Npl4, putative
AFUA_1G02840	35.9405	9.89112	23.615		3.63362	2.38749	conserved hypothetical protein
AFUA_1G02850	16.8725	43.9583	65.9638		0.383829	1.5006	L-cystine transporter, putative
AFUA_1G02860	3.08762	1.88976	8.42707		1.63387	4.45933	C2H2 transcription factor, putative
AFUA_1G02870	15.4271	12.6357	39.6286		1.22091	3.13623	conserved hypothetical protein
AFUA_1G02880	7.97585	13.882	40.2114		0.574546	2.89666	Phosphotransferase enzyme family domain protein
AFUA_1G02890	19.8138	14.4932	35.1728		1.36711	2.42684	dUTPase (Dut), putaive
AFUA_1G02900	29.5603	14.1931	48.2221		2.08273	3.39758	pyridoxal kinase, putative
AFUA_1G02910	4.09582	11.4736	97.1693		0.356979	8.46897	conserved hypothetical protein
AFUA_1G02920	8.53767	8.62691	19.1985		0.989656	2.22542	conserved hypothetical protein
AFUA_1G02940	7.59817	6.97564	30.1191		1.08924	4.31776	mitotic check point protein (Bub2), putative
AFUA_1G02950	11.3896	17.3838	31.0858		0.655184	1.7882	RNA binding protein
AFUA_1G02960	7.3963	4.75322	8.07472		1.55606	1.69879	conserved hypothetical protein
AFUA_1G02970	68.8685	14.2671	34.2924		4.8271	2.40361	salicylate hydroxylase, putative
AFUA_1G02980	407.675	210.023	328.574		1.9411	1.56447	6-phosphogluconolactonase, putative
AFUA_1G02985	18.7227	16.0002	27.3621		1.17016	1.71012	conserved hypothetical protein
AFUA_1G02990	157.732	195.692	389.388		0.806022	1.9898	WD repeat-containing protein
AFUA_1G03000	10.6517	15.1342	9.09733		0.703819	0.601111	MYND domain protein, putative
AFUA_1G03010	23.2422	35.2054	40.7886		0.660187	1.15859	cell cycle control protein (Cwf22), putative
AFUA_1G03020	125.848	89.3209	108.975		1.40894	1.22004	dolichol phosphate-mannose biosynthesis regulatory protein Dpm2, putative
AFUA_1G03030	24.896	21.262	29.8336		1.17092	1.40315	conserved hypothetical protein
AFUA_1G03035	15.411	17.0389	45.6795		0.904461	2.6809	HD superfamily hydrolase, putative
AFUA_1G03040	57.0041	144.83	356.391		0.393592	2.46075	conserved hypothetical protein
AFUA_1G03050	15.1899	32.775	23.8334		0.46346	0.72718	DEAD box helicase Mph1, putative
AFUA_1G03060	51.8245	47.0613	85.0721		1.10121	1.80769	F-actin capping protein beta subunit
AFUA_1G03070	28.7801	42.4943	49.2601		0.67727	1.15922	transcription initiation factor TFIID subunit, putative
AFUA_1G03080	53.8788	37.958	70.5116		1.41943	1.85762	ribosomal protein/carboxylic ester hydrolase (Ppe1), putative
AFUA_1G03090	984.179	899.114	515.824		1.09461	0.573702	mitochondrial integral membrane protein
AFUA_1G03100	249.175	163.576	301.148		1.5233	1.84103	ATP synthase delta chain, mitochondrial precursor, putative
AFUA_1G03110	845.42	590.551	1381.1		1.43158	2.33867	60S ribosomal protein L29, putative
AFUA_1G03120	12.4028	9.29907	27.7579		1.33377	2.98502	conserved hypothetical protein
AFUA_1G03130	21.1066	38.9491	55.987		0.541901	1.43744	conserved hypothetical protein
AFUA_1G03140	16.6671	47.4064	38.4135		0.351579	0.810302	glycosyl hydrolase, putative
AFUA_1G03150	2.91702	12.4974	15.9229		0.233409	1.27409	c-14 sterol reductase
AFUA_1G03170	42.1124	19.0939	27.7355		2.20555	1.45259	esterase, putative
AFUA_1G03180	13.4777	8.66142	2.45232		1.55606	0.283132	DUF636 domain protein
AFUA_1G03200	0.233717	0.25033	0.212629		0.933637	0.849396	MFS transporter, putative
AFUA_1G03270	3.39299	6.35978	3.08684		0.533507	0.485369	hypothetical protein
AFUA_1G03280	4.58399	2.64375	2.56638		1.7339	0.970738	MFS alpha-glucoside transporter, putative
AFUA_1G03290	3.11024	2.22088	3.7728		1.40046	1.69879	Myo-inositol transporter 1
AFUA_1G03300	1.83478	1.9652	2.41111		0.933637	1.2269	carboxylesterase, putative
AFUA_1G03310	59.0105	19.3126	7.45639		3.05554	0.386089	hypothetical protein
AFUA_1G03320	14.2062	14.8258	3.97674		0.958207	0.26823	hypothetical protein
AFUA_1G03360	0.869529	5.12234	7.11965		0.169752	1.38992	conserved hypothetical protein
AFUA_1G03370	12.2412	10.1315	27.3355		1.20824	2.69808	conserved hypothetical protein
AFUA_1G03380	23.8147	108.466	81.4666		0.219559	0.751077	UDP-N-acetylglucosaminyltransferase
AFUA_1G03390	208.55	107.128	186.506		1.94673	1.74096	60S ribosomal protein L12
AFUA_1G03400	24.6947	28.1136	56.9435		0.878393	2.02548	protein transport protein Sec23, putative
AFUA_1G03410	63.434	96.9871	41.4105		0.654045	0.426969	DNA primase large subunit
AFUA_1G03420	42.5526	39.8146	88.1056		1.06877	2.2129	adenylate kinase 2
AFUA_1G03430	20.0123	26.2467	78.4		0.762471	2.98704	staphylococcal nuclease domain protein, putative
AFUA_1G03440	44.4042	43.3071	67.001		1.02533	1.54711	peroxisomal carrier protein, putative
AFUA_1G03450	12.3406	8.22082	23.6865		1.50114	2.88128	calpain-like protease PalBory
AFUA_1G03460	58.9743	42.35	46.0319		1.39254	1.08694	conserved hypothetical protein
AFUA_1G03490	22.7031	27.0959	26.851		0.83788	0.990961	epimerase/dehydratase family protein, putative
AFUA_1G03500	38.369	65.1557	109.802		0.588881	1.68523	topoisomerase I
AFUA_1G03510	276.383	223.22	315.51		1.23816	1.41345	ATP synthase gamma chain, mitochondrial precursor, putative
AFUA_1G03520	1.71145	0.229138	2.14092		7.4691	9.34335	DnaJ domain protein
AFUA_1G03530	10.5384	19.5803	33.6542		0.538214	1.71878	MFS sugar transporter, putative
AFUA_1G03540	16.0974	43.0168	40.8282		0.374211	0.949122	dual specificity phosphatase catalytic domain protein
AFUA_1G03550	20.9984	17.9449	44.5076		1.17016	2.48023	mitochondrial dihydroxy acid dehydratase, putative
AFUA_1G03560	41.1912	31.939	59.5455		1.28969	1.86435	peroxisome biosynthesis protein (Peroxin-2), putative
AFUA_1G03570	21.6124	41.0887	38.0957		0.525993	0.927157	acid phosphatase PHOa
AFUA_1G03580	1448.2	393.721	378.678		3.67825	0.961795	conserved hypothetical protein
AFUA_1G03590	10.3209	7.70088	25.1093		1.34022	3.26058	importin 11, putative
AFUA_1G03600	38.9787	28.0406	20.6419		1.39008	0.736143	exo-beta-1,3-glucanase (Exg1), putative
AFUA_1G03610	2.1431	1.83634	5.45923		1.16705	2.97288	conserved hypothetical protein
AFUA_1G03620	24.0594	36.5068	57.6853		0.659038	1.58013	vanillin dehydrogenase, putative
AFUA_1G03630	6.28244	5.69376	29.8968		1.10339	5.25081	GPI anchored serine-threonine rich protein
AFUA_1G03640	43.9877	75.6684	183.116		0.581321	2.41998	conserved hypothetical protein
AFUA_1G03650	1.40501	1.50488	9.79982		0.933637	6.51203	conserved hypothetical protein
AFUA_1G03660	15.944	14.0636	28.4419		1.1337	2.02237	acid phosphatase, putative
AFUA_1G03680	65.664	110.74	104.272		0.592957	0.941593	conserved hypothetical protein
AFUA_1G03690	55.4325	46.1011	45.6844		1.20241	0.990961	4-carboxymuconolactone decarboxylase family protein
AFUA_1G03700	9.49178	10.615	15.8738		0.894188	1.49541	conserved hypothetical protein
AFUA_1G03710	155.397	317.319	390.563		0.489719	1.23082	C2H2 finger domain protein, putative
AFUA_1G03720	373.053	228.792	265.823		1.63053	1.16185	UPF0136 domain protein
AFUA_1G03730	64.3902	40.6362	56.6357		1.58455	1.39373	MFS transporter, putative
AFUA_1G03740	38.3462	27.493	48.1288		1.39476	1.75058	glutamate carboxypeptidase, putative
AFUA_1G03750	19.3985	9.26221	33.1701		2.09438	3.58124	conserved hypothetical protein
AFUA_1G03760	17.854	16.9211	26.9734		1.05514	1.59407	DUF726 domain protein
AFUA_1G03770	15.6515	16.3449	32.7504		0.957577	2.0037	hypothetical protein
AFUA_1G03780	20.676	18.8238	13.4808		1.0984	0.716157	C6 finger domain protein, putative
AFUA_1G03790	278.342	92.8591	202.374		2.99747	2.17937	mannosylphosphorylation protein (Mnn4), putative
AFUA_1G03800	11.054	20.0486	28.2926		0.551361	1.4112	C6 transcription factor, putative
AFUA_1G03810	44.0508	41.7116	84.7987		1.05608	2.03298	oligosaccharyl transferase subunit Dad1, putative
AFUA_1G03820	7.28326	12.056	26.3839		0.604118	2.18844	mRNA splicing factor RNA helicase (Prp16), putative
AFUA_1G03830	66.2559	114.636	168.778		0.577966	1.47229	prefoldin subunit 2, putative
AFUA_1G03840	63.3572	72.5007	113.31		0.873885	1.56289	CCAAT-binding factor complex subunit HapC
AFUA_1G03860	10.0429	10.7567	34.12		0.933637	3.17196	C6 transcription factor (AmdR), putative
AFUA_1G03870	13.1276	22.216	35.8294		0.59091	1.61278	Cut9 interacting protein Scn1, putative
AFUA_1G03880	22.8923	21.0167	47.8744		1.08924	2.27792	conserved hypothetical protein
AFUA_1G03890	68.1386	60.5546	34.3538		1.12524	0.56732	alpha/beta hydrolase, putative
AFUA_1G03910	15.8104	9.16111	17.685		1.72581	1.93044	Spo7-like protein
AFUA_1G03920	8.15001	3.20075	8.77399		2.54628	2.74123	DNA replication licensing factor Mcm3, putative
AFUA_1G03930	12.1674	9.2228	18.9885		1.31927	2.05886	translation regulator (Cya5), putative
AFUA_1G03940	22.8725	24.6991	57.6504		0.926047	2.33411	signal recognition particle, putative
AFUA_1G03950	16.7309	17.9202	43.1271		0.933637	2.40662	cytochrome P450 sterol C-22 desaturase, putaitve
AFUA_1G03960	418.887	281.785	351.173		1.48655	1.24624	Rhodanese domain protein
AFUA_1G03970	87.0314	189.595	144.731		0.459038	0.763367	mitochondrial translation initiation factor IF-2, putative
AFUA_1G03992	8.39474	5.65753	9.18191		1.48382	1.62295	conserved hypothetical protein
AFUA_1G04010	20.2648	21.3951	32.6586		0.947168	1.52645	TBC domain protein, putative
AFUA_1G04020	69.5505	45.672	69.6778		1.52283	1.52561	Yip1 domain family
AFUA_1G04040	1132.41	1033.92	1739.43		1.09526	1.68237	ubiquitin UbiA, putative
AFUA_1G04062	26.6491	18.9468	52.6692		1.40652	2.77984	RNA polymerase I specific transcription initiation factor Rrn7, putative
AFUA_1G04070	490.854	609.216	1012.63		0.805714	1.66219	Eukaryotic translation initiation factor eIF-5A
AFUA_1G04080	21.7946	34.8242	53.9583		0.625845	1.54945	GARP complex subunit (Sac2), putative
AFUA_1G04090	17.114	11.8987	19.1208		1.43831	1.60696	FAD dependent oxidoreductase, putative
AFUA_1G04100	4159.09	30877.5	20704.1		0.134696	0.670524	conserved hypothetical protein
AFUA_1G04110	8.99042	9.01806	22.8499		0.996935	2.53379	C2H2 transcription factor, putative
AFUA_1G04120	10.5687	24.1834	28.6266		0.437022	1.18373	coenzyme A transferase, putative
AFUA_1G04130	8.27041	10.1237	18.273		0.816933	1.80497	FG-GAP repeat protein, putative
AFUA_1G04140	21.8066	18.4907	57.8638		1.17933	3.12935	C6 finger domain protein, putative
AFUA_1G04150	12.6284	5.69518	22.9779		2.21739	4.03463	tartrate dehydrogenase, putative
AFUA_1G04160	28.8938	22.4808	23.8068		1.28527	1.05899	aspartate aminotransferase, putative
AFUA_1G04170	10.0935	10.0523	27.2262		1.0041	2.70845	fungal specific transcription factor, putative
AFUA_1G04190	64.8324	92.5301	75.9602		0.700663	0.820924	polyadenylate-binding protein
AFUA_1G04210	39.8725	33.3811	49.4165		1.19446	1.48038	IQ and HECT domain protein
AFUA_1G04220	7.52244	6.04285	15.3983		1.24485	2.54819	hypothetical protein
AFUA_1G04230	49.2493	50.7963	61.4003		0.969547	1.20876	50S ribosomal protein YmL27
AFUA_1G04240	84.6949	28.1203	41.7992		3.01188	1.48644	small nucleolar ribonucleoprotein complex subunit Utp14, putatrive
AFUA_1G04250	12.7237	20.8964	30.0967		0.608894	1.44028	hypothetical protein
AFUA_1G04260	29.7339	24.6517	35.9926		1.20616	1.46004	endo-1,3-beta-glucanase Engl1
AFUA_1G04270	89.1379	165.243	246.404		0.539435	1.49116	calcium ion transporter Vcx1, putative
AFUA_1G04280	96.3561	130.287	246.51		0.739567	1.89205	30S ribosomal protein S7, putative
AFUA_1G04290	20.5573	16.5443	37.5081		1.24256	2.26714	plasma membrane phosphate transporter Pho87, putative
AFUA_1G04300	122.657	29.0868	58.8832		4.21693	2.02439	conserved hypothetical protein
AFUA_1G04310	502.887	125.049	91.0425		4.02151	0.728053	hypothetical protein
AFUA_1G04315	20.5776	24.9402	72.4202		0.825075	2.90375	integral membrane protein, putative
AFUA_1G04320	410.736	363.394	677.97		1.13028	1.86566	40S ribosomal protein S8e
AFUA_1G04330	39.9995	12.191	44.6744		3.28107	3.66454	Ser/Thr protein phosphatase family protein
AFUA_1G04340	6.47319	3.56034	15.0146		1.81814	4.21717	SH3 and Ded_cyto domain protein, putative
AFUA_1G04350	24.3993	16.4268	22.832		1.48533	1.38992	conserved hypothetical protein
AFUA_1G04360	19.5882	19.8393	46.9007		0.987342	2.36403	Exocyst complex component Sec3, putative
AFUA_1G04370	10.2467	13.3481	21.4158		0.767657	1.60441	ribosome assembly and transport protein Srp40, putative
AFUA_1G04380	54.8257	57.217	51.8885		0.958207	0.906873	F-box domain protein
AFUA_1G04390	9.18934	7.13583	32.8137		1.28778	4.59845	cytochrome P450 monooxygenase, putative
AFUA_1G04400	288.978	324.803	489.022		0.889702	1.5056	37S ribosomal protein Mrp10, mitochondrial
AFUA_1G04410	37.7894	151.158	115.023		0.249999	0.760946	conserved hypothetical protein
AFUA_1G04420	18.3359	112.8	55.1773		0.162553	0.489161	conserved hypothetical protein
AFUA_1G04430	15.1267	12.5336	27.7834		1.2069	2.21672	conserved hypothetical protein
AFUA_1G04440	132.607	55.3266	75.7518		2.3968	1.36917	proline utilization protein PrnX-like, putative
AFUA_1G04450	276.612	499.862	287.377		0.553378	0.574912	siderophore biosynthesis protein, putative
AFUA_1G04455	20.8483	5.07505	24.1401		4.108	4.75662	hypothetical protein
AFUA_1G04460	17.5424	18.331	41.6506		0.956978	2.27213	lysyl-tRNA synthetase, putative
AFUA_1G04470	101.943	73.2535	136.182		1.39165	1.85905	mitochondrial intermembrane space translocase subunit Tim10, putative
AFUA_1G04480	33.7417	32.7853	32.6401		1.02917	0.995571	Sin3 complex subunit (Stb2), putative
AFUA_1G04490	146.508	117.85	145.431		1.24317	1.23403	#N/A
AFUA_1G04510	2.45877	2.19462	17.5225		1.12036	7.98432	conserved hypothetical protein
AFUA_1G04520	37.773	31.6256	53.7252		1.19438	1.69879	conserved hypothetical protein
AFUA_1G04530	253.996	177.879	414.015		1.42792	2.32751	Ribosomal L18ae protein family
AFUA_1G04540	86.8563	23.2575	51.7713		3.73455	2.226	NADH-cytochrome b5 reductase, putative
AFUA_1G04550	121.691	45.2629	93.9793		2.68853	2.0763	HMG box protein, putative
AFUA_1G04560	34.0279	40.4485	89.8376		0.841263	2.22103	urease Ure
AFUA_1G04570	3.50668	5.97535	17.5465		0.586858	2.93648	DNA repair protein, putative
AFUA_1G04575	78.2061	17.5223	37.7529		4.46324	2.15456	conserved hypothetical protein
AFUA_1G04580	21.1496	11.9927	20.3731		1.76354	1.69879	nitrogen permease regulator Npr2, putative
AFUA_1G04590	8.61297	14.6065	46.6885		0.589666	3.19641	transcriptional regulator Ngg1, putative
AFUA_1G04600	9.58347	16.4235	25.1598		0.583523	1.53195	RING finger domain protein, putative
AFUA_1G04610	42.0187	44.5808	46.8826		0.942529	1.05163	conserved hypothetical protein
AFUA_1G04620	180.733	199.535	119.208		0.905768	0.597429	alcohol dehydrogenase, zinc-containing, putative
AFUA_1G04630	188.565	199.606	66.2127		0.944686	0.331717	hypothetical protein
AFUA_1G04640	17.761	17.6183	29.2871		1.0081	1.66231	ubiquitin-protein ligase (Hul4), putative
AFUA_1G04660	357.651	339.022	578.769		1.05495	1.70717	60S ribosomal protein L15
AFUA_1G04670	77.7031	288.714	245.357		0.269135	0.849829	PSP1 domain protein
AFUA_1G04680	385.042	225.674	194.386		1.70619	0.861359	NifU-related protein
AFUA_1G04690	62.2373	51.0162	101.11		1.21995	1.98192	HIT finger domain protein, putative
AFUA_1G04700	19.9189	18.6863	31.2442		1.06596	1.67204	Ras guanyl-nucleotide exchange factor RasGEF, putative
AFUA_1G04710	30.2528	22.5279	46.9203		1.3429	2.08276	PP-loop ATPase superfamily protein, putative
AFUA_1G04720	22.2382	44.3898	68.052		0.500976	1.53306	C-8 sterol isomerase (Erg-1), putative
AFUA_1G04730	16.2409	4.89243	7.38775		3.3196	1.51004	endoglucanase, putative
AFUA_1G04750	7.08524	15.7848	11.087		0.448864	0.702385	cyclin (Pcl1), putative
AFUA_1G04760	34.9967	33.845	74.497		1.03403	2.20112	conserved hypothetical protein
AFUA_1G04770	10.2826	6.34673	16.0141		1.62014	2.5232	conserved hypothetical protein
AFUA_1G04780	39.8972	15.3401	36.5632		2.60085	2.38351	peroxisomal ABC transporter (PXA1), putative
AFUA_1G04790	26.4424	44.2811	63.1961		0.597149	1.42716	general stress response phosphoprotein phosphatase Psr1/2, putative
AFUA_1G04800	93.4379	84.4306	139.721		1.10668	1.65486	protein phosphatase PP1 regulatory subunit Sds22, putative
AFUA_1G04810	50.2453	34.7906	64.1811		1.44422	1.84478	conserved hypothetical protein
AFUA_1G04820	46.8308	86.7512	144.229		0.539828	1.66256	D-xylose reductase (Xyl1), putative
AFUA_1G04830	19.7605	26.2122	58.0813		0.753869	2.21581	transcription factor AbaA
AFUA_1G04840	16.4474	21.8633	37.8091		0.752283	1.72934	pre-rRNA processing protein Mrd1, putative
AFUA_1G04850	102.147	72.4824	181.214		1.40926	2.50011	dynein light chain type 1, putative
AFUA_1G04860	49.9468	82.1561	159.852		0.60795	1.94571	rhodopsin family protein
AFUA_1G04870	10.7345	38.3248	84.9632		0.280091	2.21692	urea transporter (Dur3), putative
AFUA_1G04880	6.24875	7.48031	26.7526		0.83536	3.5764	conserved hypothetical protein
AFUA_1G04890	41.352	31.4961	62.7014		1.31293	1.99077	translocon protein Sec61beta, putative
AFUA_1G04900	54.5847	27.1653	49.1579		2.00935	1.80958	proliferating cell nuclear antigen (PCNA)
AFUA_1G04910	18.2912	13.4046	38.1862		1.36455	2.84874	conserved hypothetical protein
AFUA_1G04920	16.1175	17.6468	21.6147		0.913341	1.22485	calmodulin-binding protein Sha1, putative
AFUA_1G04930	113.463	89.5946	45.4127		1.2664	0.506869	conserved hypothetical protein
AFUA_1G04940	130.237	1051.68	480.913		0.123837	0.457282	small monomeric GTPase SarA, putative
AFUA_1G04950	88.3538	163.605	339.919		0.540045	2.07769	serine/threonine protein phosphatase PP1, putative
AFUA_1G04960	8.06633	10.9219	33.6464		0.738549	3.08064	Leucine Rich Repeat domain protein
AFUA_1G04970	74.5149	55.5764	55.8737		1.34076	1.00535	Patatin-like serine hydrolase, putative
AFUA_1G04980	26.7832	16.5958	27.6893		1.61386	1.66846	RNA polymerase III transcription factor TFIIIC subunit (Tfc4), putative
AFUA_1G04990	71.0383	75.8757	144.559		0.936245	1.90521	SAM domain protein
AFUA_1G05000	65.8482	56.6085	126.908		1.16322	2.24185	conserved hypothetical protein
AFUA_1G05010	18.3787	16.123	36.4664		1.13991	2.26176	MFS multidrug transporter, putative
AFUA_1G05020	3.00387	9.95859	8.84918		0.301637	0.888598	sulfate transporter, putative
AFUA_1G05040	76.7643	110.151	183.658		0.696903	1.66733	protein mitochondrial targeting protein (Mas1), putative
AFUA_1G05050	65.9412	92.4272	134.055		0.71344	1.45038	cytosine deaminase, putative
AFUA_1G05060	63.1421	44.1376	72.2595		1.43057	1.63714	uroporphyrinogen decarboxylase
AFUA_1G05070	23.3917	22.9881	32.9089		1.01756	1.43157	tRNA methyltransferase, putative
AFUA_1G05080	191.22	101.785	195.405		1.87866	1.91977	60S ribosomal protein P0
AFUA_1G05100	6.38417	7.44578	22.5872		0.857422	3.03356	GARP complex subunit Vps53, putative
AFUA_1G05110	72.293	113.728	94.5444		0.635668	0.831323	mRNA export factor mex67
AFUA_1G05120	6.07878	9.17439	26.8973		0.662581	2.93178	COPII-coated vesicle membrane protein Erv46, putative
AFUA_1G05130	104.626	83.4889	126.946		1.25317	1.52051	PH domain protein
AFUA_1G05140	4.51223	6.53871	11.1079		0.69008	1.69879	conserved hypothetical protein
AFUA_1G05150	13.7691	7.02277	23.8604		1.96064	3.39758	C2H2 transcription factor (TFIIIA), putative
AFUA_1G05160	80.1175	84.2082	151.227		0.951421	1.79586	DNA-directed RNA polymerase I, II, and III subunit Rpb6
AFUA_1G05170	6.1066	4.16224	9.59605		1.46714	2.3055	MFS monocarboxylate transporter, putative
AFUA_1G05180	4.44552	15.645	46.2218		0.284151	2.95442	N-acetyltransferase (Nat5), putative
AFUA_1G05190	30.603	32.7783	242.476		0.933637	7.39746	conserved hypothetical protein
AFUA_1G05200	36.6665	54.7102	94.2		0.670196	1.7218	eukaryotic translation initiation factor 3 subunit EifCa, putative
AFUA_1G05210	50.6525	65.6745	99.4403		0.771266	1.51414	G-protein complex gamma subunit GpgA
AFUA_1G05220	250.99	149.532	233.202		1.67851	1.55955	selenoprotein domain protein
AFUA_1G05230	49.6114	107.185	96.5602		0.462858	0.900874	high affinity cAMP phosphodiesterase, putative
AFUA_1G05240	21.9828	71.1729	65.5352		0.308865	0.920789	PHD finger and BAH domain protein (Snt2), putative
AFUA_1G05260	6.70304	11.5976	30.1393		0.577966	2.59875	DNA-directed DNA polymerase theta, putative
AFUA_1G05270	7.43447	10.8966	43.4298		0.682273	3.98563	conserved hypothetical protein
AFUA_1G05280	9.23676	5.0693	7.3616		1.8221	1.45219	Golgi complex component (Vps8), putative
AFUA_1G05290	39.074	6.55065	17.6196		5.96491	2.68975	endo-1,3(4)-beta-glucanase, putative
AFUA_1G05300	2.22795	2.9166	13.175		0.763885	4.51724	capsular associated protein, putative
AFUA_1G05310	4.20626	6.69697	13.135		0.628083	1.96133	nucleolar ATPase Kre33, putative
AFUA_1G05320	15.1941	18.1727	68.6548		0.836093	3.77791	disulfide isomerase, putative
AFUA_1G05330	11.2401	6.01952	15.5519		1.86727	2.58358	F-box domain protein
AFUA_1G05340	115.289	83.688	183.427		1.3776	2.1918	40S ribosomal protein S19
AFUA_1G05350	31.7689	27.8403	46.419		1.14111	1.66733	conserved hypothetical protein
AFUA_1G05360	13.76	18.1391	34.8589		0.75858	1.92176	CAIB/BAIF family enzyme
AFUA_1G05370	24.5833	132.693	97.4063		0.185265	0.734073	conserved hypothetical protein
AFUA_1G05380	293.332	349.75	392.325		0.838691	1.12173	conserved hypothetical protein
AFUA_1G05390	390.199	306.934	503.202		1.27128	1.63945	mitochondrial ADP,ATP carrier protein (Ant), putative
AFUA_1G05400	115.786	95.9646	170.548		1.20655	1.7772	hypothetical protein
AFUA_1G05410	12.3655	17.2387	31.9635		0.717307	1.85417	ribosome biogenesis protein Kri1
AFUA_1G05420	65.7731	45.8711	54.739		1.43387	1.19332	transcription factor SipA3, putative
AFUA_1G05430	13.847	13.6447	39.8083		1.01482	2.91749	conserved hypothetical protein
AFUA_1G05440	6.70645	10.3063	41.3829		0.650717	4.01532	UDP-Glc/Gal endoplasmic reticulum nucleotide sugar transporter
AFUA_1G05450	84.9095	87.9467	138.368		0.965466	1.57331	peptidyl-prolyl cis-trans isomerase
AFUA_1G05460	177.246	135.754	149.091		1.30563	1.09824	conserved hypothetical protein
AFUA_1G05470	145.404	171.563	238.04		0.847525	1.38748	3-oxo-5-alpha-steroid 4-dehydrogenase, putative
AFUA_1G05490	51.3375	139.844	91.7426		0.367106	0.656037	histone deacetylase complex subunit (Hos4), putative
AFUA_1G05500	206.627	137.089	267.895		1.50724	1.95416	40S ribosomal protein S12
AFUA_1G05510	15.1912	40.6774	71.6153		0.373455	1.76057	conserved hypothetical protein
AFUA_1G05520	9.47651	5.75172	34.1984		1.6476	5.94577	mandelate racemase/muconate lactonizing enzyme family protein
AFUA_1G05530	13.8531	19.1806	45.8017		0.722248	2.38792	uridine nucleosidase Urh1, putative
AFUA_1G05540	40.8874	60.4353	90.2675		0.676549	1.49362	PXA domain protein
AFUA_1G05550	2.40197	0.643174	7.37518		3.73455	11.4668	conserved hypothetical protein
AFUA_1G05560	50.5154	107.21	177.872		0.471181	1.6591	GTP binding protein, putative
AFUA_1G05570	8.38475	12.573	34.0726		0.666884	2.70998	cysteine dioxygenase Cdo1, putative
AFUA_1G05580	3.0199	3.59395	16.3319		0.840274	4.54427	glycogenin
AFUA_1G05590	128.912	87.2484	74.801		1.47753	0.857334	alpha/beta hydrolase, putative
AFUA_1G05595	8.1959	16.0207	31.3168		0.511582	1.95477	capsule-associated protein CAP1, putative
AFUA_1G05600	3.56763	1.91061	6.49144		1.86727	3.39758	hypothetical protein
AFUA_1G05610	71.3641	48.6415	86.5666		1.46714	1.77969	protein phosphotase 2a 65kd regulatory sububit
AFUA_1G05620	41.7786	36.5336	89.7893		1.14357	2.45772	phenylalanyl-tRNA synthetase, beta subunit
AFUA_1G05630	164.004	105.591	364.542		1.55319	3.45238	40S ribosomal protein S3, putative
AFUA_1G05640	70.4847	34.7627	69.3444		2.0276	1.99479	protein phosphatase
AFUA_1G05650	13.8628	10.2925	21.7843		1.34689	2.11653	respiratory complex assembly protein Rmp1, putative
AFUA_1G05655	97.1754	57.8641	103.245		1.67937	1.78426	conserved hypothetical protein
AFUA_1G05660	40.6482	40.0821	120.92		1.01412	3.01682	conserved hypothetical protein
AFUA_1G05670	10.8973	4.59221	10.4016		2.373	2.26505	conserved hypothetical protein
AFUA_1G05680	14.4153	18.4526	31.3471		0.781207	1.69879	hypothetical protein
AFUA_1G05690	79.3726	38.0508	42.948		2.08596	1.1287	conserved hypothetical protein
AFUA_1G05700	61.9974	72.1785	120.164		0.858946	1.66482	splicing factor 3B subunit 10 (SF3b10), putative
AFUA_1G05710	1.36804	3.90741	10.994		0.350114	2.81362	tRNA-specific adenosine deaminase, putative
AFUA_1G05720	9.58241	8.01056	20.625		1.19622	2.57473	c-14 sterol reductase
AFUA_1G05730	51.6901	61.2697	261.151		0.843648	4.26233	vacuolar sorting receptor (Mrl1), putative
AFUA_1G05740	3.74157	7.62722	14.2747		0.490555	1.87155	C6 transcription factor, putative
AFUA_1G05745	231.165	104.895	98.5954		2.20376	0.93994	hypothetical protein
AFUA_1G05750	13.6951	14.3193	23.7322		0.956409	1.65736	conserved hypothetical protein
AFUA_1G05760	22.4863	22.3885	42.3554		1.00437	1.89184	arsenite efflux transporter ArsB, puative
AFUA_1G05770	227.193	123.381	11.8688		1.8414	0.0961966	beta-glucosidase, putative
AFUA_1G05780	1.39961	1.49909	4.66885		0.933637	3.11445	conserved hypothetical protein
AFUA_1G05790	7.54193	8.078	35.4507		0.933637	4.38854	GPI anchored serine-rich protein
AFUA_1G05800	152.346	161.628	769.197		0.942572	4.75905	MAP kinase kinase (Mkk2), putative
AFUA_1G05810	21.6884	18.9179	61.3212		1.14645	3.24144	protein transport protein Sec39, putative
AFUA_1G05820	181.949	132.42	305.597		1.37403	2.30779	conserved hypothetical protein
AFUA_1G05830	19.4258	61.1838	55.0023		0.3175	0.898967	TBP associated factor (Mot1), putative
AFUA_1G05840	4.23753	4.53873	7.38909		0.933637	1.62801	conserved hypothetical protein
AFUA_1G05850	329.913	203.562	141.273		1.6207	0.694004	erythromycin esterase, putative
AFUA_1G05860	255.178	109.39	97.003		2.33272	0.886759	conserved hypothetical protein
AFUA_1G05870	154.347	59.5305	75.5057		2.59274	1.26835	inositol phospholipid biosynthesis protein Scs3, putative
AFUA_1G05880	3.32327	2.66961	9.07023		1.24485	3.39758	hypothetical protein
AFUA_1G05890	13.6951	2.0955	28.4786		6.53546	13.5903	hypothetical protein
AFUA_1G05900	52.7844	43.9935	70.9195		1.19982	1.61204	DnaJ and TPR domain protein
AFUA_1G05910	2155	98.9613	84.9965		21.7762	0.858886	conserved hypothetical protein
AFUA_1G05920	69.4536	6.81039	10.8278		10.1982	1.58989	conserved hypothetical protein
AFUA_1G05930	8.01377	7.80308	18.3372		1.027	2.34999	serine/threonine protein kinase, putative
AFUA_1G05940	99.3138	55.2165	131.046		1.79862	2.37331	RNA polymerase II mediator complex protein Nut2, putative
AFUA_1G05960	16.7006	4.97628	13.9371		3.35605	2.80071	Peptidase family M28 family
AFUA_1G05970	23.5573	49.7995	57.7152		0.473043	1.15895	ubiquitin ligase complex F-box protein GRR1, putative
AFUA_1G05980	11.5824	23.458	18.0092		0.493751	0.767723	AMP-binding domain protein, putative
AFUA_1G05990	386.007	279.043	691.483		1.38333	2.47805	ribosomal protein L16a
AFUA_1G06000	29.4257	4.2023	7.13884		7.00228	1.69879	Ser/Thr protein phosphatase family protein
AFUA_1G06020	6.79606	6.61738	7.68172		1.027	1.16084	DnaJ domain protein
AFUA_1G06030	26.704	27.3093	49.4125		0.977833	1.80936	AP-1 adaptor complex subunit gamma, putative
AFUA_1G06040	149.469	22.0663	28.3058		6.77363	1.28276	sterol o-acyltransferase (APE2), putaitve
AFUA_1G06050	84.5757	87.3095	75.932		0.968689	0.869688	nucleotide-sugar transporter, putative
AFUA_1G06060	36.7207	291.739	98.46		0.125868	0.337493	conserved hypothetical protein
AFUA_1G06071	41.7967	18.0975	30.0967		2.30952	1.66303	LMBR1 domain protein
AFUA_1G06080	109.908	45.8352	37.8118		2.3979	0.824953	BAG domain protein
AFUA_1G06090	7.19942	5.60811	11.7103		1.28375	2.0881	conserved hypothetical protein
AFUA_1G06100	661.847	697.538	413.562		0.948832	0.592887	glutaredoxin Grx1, putative
AFUA_1G06110	91.6797	39.8828	73.9119		2.29873	1.85323	conserved hypothetical protein
AFUA_1G06120	1.28223	0.54935	1.16654		2.33409	2.12349	RING finger protein
AFUA_1G06130	0.886691	0.379887	0.322674		2.33409	0.849396	alpha-L-rhamnosidase B, putative
AFUA_1G06150	1.35986	0.291303	5.69093		4.66819	19.5361	L-serine dehydratase, putative
AFUA_1G06160	3.42565	0.333559	3.82487		10.27	11.4668	conserved predicted protein
AFUA_1G06170	138.516	266.827	266.037		0.519122	0.997039	proteasome regulatory particle subunit Rpt5, putative
AFUA_1G06180	57.5234	35.2707	117.939		1.63091	3.34382	trimethyllysine dioxygenase TmlH, putative
AFUA_1G06190	1.71812	2.94439	16.8814		0.583523	5.73342	histone H4 arginine methyltransferase RmtA
AFUA_1G06200	5.46393	4.68185	54.0174		1.16705	11.5376	Mn2+ homeostasis protein (Per1), putative
AFUA_1G06210	15.617	16.4979	57.0262		0.946605	3.45657	N-acetylglucosamine-phosphate mutase
AFUA_1G06220	8.97564	8.7896	27.9969		1.02117	3.18523	ATP-dependent RNA helicase , putative
AFUA_1G06230	48.9549	101.665	71.7552		0.481532	0.705801	ribosome biogenesis protein Ssf2, putative
AFUA_1G06240	66.3518	39.4205	83.4733		1.68318	2.11751	riboflavin synthase, alpha subunit
AFUA_1G06250	13.5077	14.4678	27.5272		0.933637	1.90265	CAIB/BAIF family enzyme
AFUA_1G06260	17.3563	7.72843	26.6128		2.24578	3.4435	PHD finger domain protein, putative
AFUA_1G06270	6.97471	3.89764	15.1737		1.78947	3.89306	zinc metallopeptidase, putative
AFUA_1G06280	14.0675	16.4889	56.7469		0.853151	3.44152	short-chain dehydrogenase/reductase family protein, putative
AFUA_1G06290	14.4949	19.6108	41.4119		0.73913	2.11169	small nucleolar ribonucleoprotein complex subunit (SOF1), putative
AFUA_1G06300	57.8228	47.8947	85.1039		1.20729	1.7769	proteasome regulatory particle subunit (RpnF), putative
AFUA_1G06310	53.3812	76.5744	118.81		0.697116	1.55156	SWI-SNF complex subunit (BAF60b), putative
AFUA_1G06320	47.2067	60.9424	71.958		0.774611	1.18075	DUF887 domain protein
AFUA_1G06330	15.9496	6.17772	20.7751		2.58179	3.36291	conserved hypothetical protein
AFUA_1G06340	677.201	480.083	1199.15		1.41059	2.49779	60S ribosomal protein L27e
AFUA_1G06350	145.172	49.066	158.488		2.95871	3.2301	pathogenesis associated protein Cap20, putative
AFUA_1G06360	9.16797	6.7982	12.8319		1.34859	1.88755	conserved hypothetical protein
AFUA_1G06370	15.515	14.3518	46.1949		1.08105	3.21876	ankyrin repeat protein
AFUA_1G06380	19.6982	49.9697	71.6833		0.394202	1.43453	RNA polymerase III subunit C11, putative
AFUA_1G06390	1186.77	837.008	1157.94		1.41788	1.38343	translation elongation factor EF-1 alpha subunit , putative
AFUA_1G06400	47.4951	51.3159	39.9342		0.925542	0.778203	cAMP-dependent protein kinase-like, putative
AFUA_1G06410	18.986	26.888	47.5964		0.706112	1.77017	nuclear localization protein NPL6, putative
AFUA_1G06420	83.7066	78.3822	129.507		1.06793	1.65225	SNF7 family protein
AFUA_1G06430	49.7414	58.8852	117.5		0.84472	1.99541	conserved hypothetical protein
AFUA_1G06440	17.6045	15.4066	25.0007		1.14266	1.62273	MFS multidrug transporter, putative
AFUA_1G06450	2.98277	0.532464	3.39204		5.60182	6.37047	3-beta hydroxysteroid dehydrogenase/isomerase family protein, putative
AFUA_1G06460	35.2159	47.8972	85.4358		0.735239	1.78373	BCAS2 family protein
AFUA_1G06470	35.9934	22.4178	41.2567		1.60557	1.84036	neutral/alkaline nonlysosomal ceramidase, putative
AFUA_1G06480	26.7778	16.0529	57.268		1.6681	3.56746	conserved hypothetical protein
AFUA_1G06490	51.8075	32.2802	67.0738		1.60493	2.07786	conserved hypothetical protein
AFUA_1G06500	18.1506	15.6474	30.2065		1.15997	1.93044	hypothetical protein
AFUA_1G06510	168.783	132.695	132.347		1.27196	0.997374	conserved hypothetical protein
AFUA_1G06520	21.0955	17.3403	32.9167		1.21656	1.89827	mitochondrial translation initiation factor, putative
AFUA_1G06530	24.5823	22.0132	61.2266		1.1167	2.78135	mitochondrial carrier protein (Ymc1), putative
AFUA_1G06540	12.8231	2.96963	19.0756		4.31807	6.42355	C6 transcription factor, putative
AFUA_1G06550	3.47189	8.1346	17.175		0.426806	2.11135	MFS transporter, putative
AFUA_1G06560	2.00022	1.22423	1.81974		1.63387	1.48644	alpha-glucosidase, putative
AFUA_1G06570	40.4331	32.3862	61.7346		1.24847	1.9062	40S ribosomal protein S2, putative
AFUA_1G06580	435.045	136.167	122.557		3.19492	0.900048	high expression lethality protein Hel10, putative
AFUA_1G06590	72.0012	38.9069	24.1954		1.8506	0.621879	phosphoglycerate mutase family protein, putative
AFUA_1G06600	60.9936	51.8211	89.9108		1.177	1.73502	60S ribosome biogenesis protein Rrp14, putative
AFUA_1G06610	103.82	83.3992	107.945		1.24485	1.29432	NADH-quinone oxidoreductase, 23 kDa subunit, putative
AFUA_1G06620	101.083	57.5365	147.665		1.75684	2.56645	acyl carrier protein, putative
AFUA_1G06630	24.671	34.1319	54.8655		0.722816	1.60746	Golgi phosphoprotein 3 (GPP34) domain containing protein
AFUA_1G06640	346.388	170.159	178.421		2.03567	1.04855	zinc-binding oxidoreductase, putative
AFUA_1G06650	23.6534	33.7795	44.1418		0.700228	1.30676	actin filament organization protein App1-like, putative
AFUA_1G06660	92.2151	148.967	129.792		0.619032	0.871283	CBS domain protein
AFUA_1G06670	85.4473	240.002	319.919		0.356027	1.33298	conserved hypothetical protein
AFUA_1G06680	50.1798	53.7466	108.295		0.933637	2.01492	VHS domain protein
AFUA_1G06690	98.0099	145.858	113.592		0.671953	0.778781	RLI and DUF367 domain protein
AFUA_1G06700	56.2829	84.189	132.867		0.66853	1.5782	metacaspase CasA
AFUA_1G06710	56.4632	38.1715	101.565		1.4792	2.66076	t-complex protein 1, eta subunit, putative
AFUA_1G06720	23.0401	124.841	167.073		0.184556	1.33829	histone acetyltransferase Spt10, putative
AFUA_1G06730	360.894	80.4274	40.7786		4.4872	0.507024	lanthionine synthetase C family protein, putative
AFUA_1G06740	167.124	49.5625	52.3162		3.37197	1.05556	conserved hypothetical protein
AFUA_1G06762	27.3944	24.4043	27.5587		1.12252	1.12925	Leucine Rich Repeat domain protein
AFUA_1G06770	831.911	879.134	1481.51		0.946285	1.68519	40S ribosomal protein S26
AFUA_1G06780	3.84786	3.72886	13.1692		1.03192	3.5317	CBS and PB1 domain protein
AFUA_1G06790	19.4787	16.8329	46.3167		1.15718	2.75156	importin beta-3 subunit, putative
AFUA_1G06800	25.7574	10.5862	49.5914		2.43312	4.68455	Fe-containing alcohol dehydrogenase, putative
AFUA_1G06810	13.9494	14.1289	17.9326		0.987295	1.26921	aconitate hydratase, mitochondrial
AFUA_1G06820	193.829	247.118	439.427		0.784357	1.77821	conserved hypothetical protein
AFUA_1G06830	332.49	213.442	602.023		1.55775	2.82055	60S acidic ribosomal protein P1
AFUA_1G06840	20.402	19.8656	38.4722		1.027	1.93662	vacuolar membrane PQ loop repeat protein
AFUA_1G06850	49.9174	47.4061	50.7116		1.05297	1.06973	Nulp1-pending protein
AFUA_1G06860	22.8942	23.0158	48.5998		0.994716	2.11158	protein phophatase 2C family protein
AFUA_1G06870	1.8472	1.319	8.9628		1.40046	6.79516	hypothetical protein
AFUA_1G06880	2.12185	4.92413	9.652		0.43091	1.96014	mitochondrial export translocase Oxa2, putative
AFUA_1G06890	14.2705	14.3585	28.523		0.993872	1.98649	alpha-1,2-mannosyltransferase (Alg11), putative
AFUA_1G06900	33.8995	106.69	91.9377		0.317738	0.861725	C2H2 transcription factor Crz1, putative
AFUA_1G06910	4.76306	5.10162	22.5331		0.933637	4.41686	arabinogalactan endo-1,4-beta-galactosidase GalA
AFUA_1G06920	89.2747	176.993	270.463		0.504398	1.5281	serine/threonine protein kinase, putative
AFUA_1G06930	7.54058	5.29154	18.9247		1.42503	3.5764	conserved hypothetical protein
AFUA_1G06940	23.2025	18.8748	44.0884		1.22929	2.33584	chorismate synthase
AFUA_1G06950	23.7789	26.3277	32.5716		0.903193	1.23716	lipoyltransferase and lipoate-protein ligase, putative
AFUA_1G06960	62.7749	45.8752	99.0514		1.36838	2.15915	pyruvate dehydrogenase E1 component alpha subunit, putative
AFUA_1G06970	7.63141	9.67956	12.0586		0.788405	1.24578	conserved hypothetical protein
AFUA_1G06980	28.6473	23.22	59.6384		1.23374	2.56841	30S ribosomal subunit S4, putative
AFUA_1G07000	71.4192	33.3042	44.7901		2.14445	1.34488	DNA repair protein Rad26, putative
AFUA_1G07010	227.751	152.425	218.925		1.49419	1.43628	phosphatidate cytidylyltransferase
AFUA_1G07020	22.6573	18.6447	42.2313		1.21521	2.26505	cyclin, putative
AFUA_1G07030	11.4915	3.41898	10.4546		3.36109	3.05782	conserved hypothetical protein
AFUA_1G07040	163.565	117.408	140.366		1.39314	1.19554	fructosamine-3-kinase, putative
AFUA_1G07050	46.372	57.3797	61.1724		0.80816	1.0661	armadillo repeat protein
AFUA_1G07070	83.7179	101.123	103.961		0.827886	1.02807	cyclin-dependent protein kinase regulator Pho80
AFUA_1G07080	35.6481	17.1691	20.0249		2.0763	1.16633	tRNA-specific adenosine-34 deaminase subunit Tad3, putative
AFUA_1G07090	31.7745	49.433	83.4705		0.64278	1.68856	conserved hypothetical protein
AFUA_1G07100	89.7752	57.9874	79.1809		1.54818	1.36548	conserved hypothetical protein
AFUA_1G07130	42.5453	6.30215	20.5885		6.75092	3.26691	dienelactone hydrolase family protein
AFUA_1G07140	5.08948	5.67838	20.8362		0.896292	3.66939	c-24(28) sterol reductase
AFUA_1G07150	45.8099	106.598	62.6614		0.429746	0.587831	RING finger domain protein (Rnf10), putative
AFUA_1G07160	30.2901	36.7589	42.4732		0.82402	1.15545	ubiquitin C-terminal hydrolase, putative
AFUA_1G07170	13.5506	13.3433	32.8081		1.01554	2.45878	Na/H antiporter, putative
AFUA_1G07180	42.7942	40.7782	115.188		1.04944	2.82473	ribonuclease H, putative
AFUA_1G07190	5.51361	7.67716	29.5951		0.718183	3.85495	ankyrin repeat protein
AFUA_1G07195	21.7062	14.0178	30.4927		1.54847	2.17528	conserved hypothetical protein
AFUA_1G07200	9.76562	9.90925	26.1858		0.985506	2.64256	mitochondrial cytochrome b2, putative
AFUA_1G07210	37.1867	27.5016	42.6919		1.35216	1.55234	conserved hypothetical protein
AFUA_1G07220	92.3859	136.885	96.8131		0.674919	0.707261	6-phosphofructo-2-kinase 1
AFUA_1G07230	19.2861	28.2674	28.6275		0.682273	1.01274	DSBA-like thioredoxin domain protein
AFUA_1G07240	136.437	150.188	134.999		0.90844	0.898863	hypothetical protein
AFUA_1G07250	83.1449	131.113	125.686		0.634146	0.958604	SPX domain protein
AFUA_1G07260	32.9127	24.4491	42.0168		1.34617	1.71854	NUDIX family hydrolase, putative
AFUA_1G07270	12.2835	8.22286	50.2881		1.49382	6.11565	conserved hypothetical protein
AFUA_1G07280	21.3574	16.4235	40.1063		1.30042	2.44201	conserved hypothetical protein
AFUA_1G07300	37.1002	24.5188	80.1925		1.51314	3.27066	tetracycline transporter, putative
AFUA_1G07310	89.1907	57.3182	78.871		1.55606	1.37602	conserved hypothetical protein
AFUA_1G07320	8.93178	11.4183	31.9792		0.782237	2.80071	chromosome segregation protein (SepB), putative
AFUA_1G07330	1.199	0.856153	13.0898		1.40046	15.2891	dihydroxy-acid dehydratase, putative
AFUA_1G07340	13.8381	10.1899	18.2941		1.35802	1.79531	cytochrome P450, putative
AFUA_1G07350	93.1503	151.041	167.388		0.616723	1.10823	RNA12 protein, putative
AFUA_1G07360	87.2504	30.201	56.1453		2.88899	1.85905	conserved hypothetical protein
AFUA_1G07370	10.3971	5.56805	28.9024		1.86727	5.19075	conserved hypothetical protein
AFUA_1G07380	102.765	102.862	181.901		0.999059	1.7684	glutamate synthase Glt1, putative
AFUA_1G07400	18.2429	6.1704	17.1792		2.95652	2.78413	conserved hypothetical protein
AFUA_1G07420	52.0874	51.9685	132.425		1.00229	2.54819	SNARE complex subunit (Bet1), putative
AFUA_1G07430	449.404	292.855	729.968		1.53456	2.49259	conserved hypothetical protein
AFUA_1G07440	1714.52	1191.45	2340.59		1.43901	1.96448	molecular chaperone Hsp70
AFUA_1G07450	65.3451	36.4618	97.5392		1.79215	2.67511	#N/A
AFUA_1G07470	859.288	917.091	991.336		0.936972	1.08096	autophagic death protein Aut7/IDI-7, putative
AFUA_1G07480	28.6057	35.0581	53.3005		0.815952	1.52035	coproporphyrinogen III oxidase, putative
AFUA_1G07490	9.76312	11.2493	22.8784		0.867888	2.03376	microtubule binding protein HOOK3, putative
AFUA_1G07500	1147.29	998.77	823.061		1.1487	0.824075	conserved hypothetical protein
AFUA_1G07510	59.2607	37.092	53.0713		1.59767	1.4308	mRNA cleavage factor complex component Pcf11, putative
AFUA_1G07520	93.4036	56.0642	185.065		1.66601	3.30094	dimeric dihydrodiol dehydrogenase, putative
AFUA_1G07530	84.6274	135.964	100.089		0.622425	0.736143	adenylate kinase, putative
AFUA_1G07540	100.219	89.5753	146.511		1.11882	1.63561	26S proteasome regulatory particle subunit Rpn8, putative
AFUA_1G07550	31.7306	16.3477	40.5608		1.94098	2.48113	conserved hypothetical protein
AFUA_1G07555	9.69144	5.69243	21.047		1.70252	3.69737	ubiquitin-specific protease, putative
AFUA_1G07560	4.25612	8.54745	28.0726		0.49794	3.28433	MYB DNA-binding domain protein
AFUA_1G07570	15.411	16.5064	49.75		0.933637	3.01398	conserved hypothetical protein
AFUA_1G07580	69.2509	111.968	119.985		0.618486	1.0716	cell polarity protein (Alp11), putative
AFUA_1G07590	46.6095	84.5	78.0302		0.551592	0.923435	Cupin domain protein
AFUA_1G07600	10.9969	14.634	29.7108		0.751464	2.03026	ribonuclease HI large subunit
AFUA_1G07610	75.3766	59.7027	100.27		1.26253	1.67949	peroxisomal membrane protein pex16 (peroxin-16)
AFUA_1G07620	90.3258	47.0704	48.5383		1.91895	1.03118	conserved hypothetical protein
AFUA_1G07625	49.2063	66.4927	98.1218		0.740026	1.47568	WD domain protein
AFUA_1G07630	70.4933	67.3414	123.643		1.04681	1.83607	zinc knuckle domain protein (Byr3), putative
AFUA_1G07640	111.191	37.1507	34.4407		2.99297	0.927055	YdiU domain protein
AFUA_1G07650	158.057	110.674	206.961		1.42813	1.87001	ketoreductase, putative
AFUA_1G07660	24.9734	19.7429	24.6134		1.26493	1.24669	conserved hypothetical protein
AFUA_1G07670	103.825	115.203	95.692		0.90124	0.830639	conserved hypothetical protein
AFUA_1G07680	72.675	66.0806	110.355		1.09979	1.67	secretion related GTPase SrgD
AFUA_1G07690	15.1624	35.3864	49.3691		0.428481	1.39514	protein O-mannosyl transferase
AFUA_1G07700	28.6024	25.7159	52.2332		1.11225	2.03116	MFS monosaccharide transporter, putative
AFUA_1G07710	31.8113	38.5306	114.953		0.825613	2.98341	mitochondrial carrier protein, putative
AFUA_1G07720	79.2013	222.395	275.562		0.35613	1.23907	transcription elongation complex subunit (Cdc68)
AFUA_1G07730	32.5711	104.258	135.218		0.312409	1.29696	metalloprotease MEP1
AFUA_1G07740	33.2741	154.221	209.151		0.215757	1.35618	LEM3/CDC50 family protein
AFUA_1G07750	130.926	350.581	345.661		0.373455	0.985965	SWIRM domain protein Fun19, putative
AFUA_1G08760	91.461	98.6568	197.989		0.927062	2.00685	porphobilinogen synthase, putative
AFUA_1G08765	40.9203	57.3949	112.57		0.712959	1.96133	acetyltransferase, putative
AFUA_1G08770	49.2403	62.1735	106.348		0.791982	1.71051	C6 finger domain protein, putative
AFUA_1G08790	143.424	141.475	225.215		1.01377	1.59191	exportin KapK
AFUA_1G08795	57.4576	81.8756	143.369		0.701767	1.75106	shugoshin family protein
AFUA_1G08800	8.681	10.5545	42.4769		0.82249	4.02452	cytochrome P450 phenylacetate hydroxylase, putative
AFUA_1G08810	240.193	52.815	50.019		4.54782	0.947061	glycerol-3-phosphate dehydrogenase, mitochondrial
AFUA_1G08820	133.076	120.461	230.352		1.10472	1.91225	DUF814 domain protein, putative
AFUA_1G08830	28.487	35.187	78.7948		0.809588	2.23932	Golgi matrix protein, putative
AFUA_1G08840	155.2	213.32	488.644		0.727542	2.29066	guanylate kinase
AFUA_1G08850	56.6297	9.36032	29.5763		6.04997	3.15975	septin
AFUA_1G08860	29.4584	21.0349	57.2793		1.40046	2.72306	meiotic recombination protein Ski8/Rec14, putative
AFUA_1G08870	20.8753	83.3507	67.7635		0.250452	0.812993	conserved hypothetical protein
AFUA_1G08880	50.036	50.3445	173.808		0.993872	3.45238	iron/copper transporter Atx1, putative
AFUA_1G08890	48.7186	194.882	307.545		0.24999	1.57811	hypothetical protein
AFUA_1G08900	45.1803	73.9902	93.5258		0.610625	1.26403	CHY and RING finger domain protein, putative
AFUA_1G08910	21.4058	22.7313	62.7506		0.941686	2.76054	DUF1680 domain protein
AFUA_1G08920	48.3475	37.5533	54.7296		1.28744	1.45738	IQ calmodulin-binding motif domain protein
AFUA_1G08930	46.8357	61.156	86.1771		0.765841	1.40914	WD repeat protein
AFUA_1G08940	29.3188	58.7006	69.7343		0.499463	1.18797	pheromone processing carboxypeptidase KexA
AFUA_1G08950	24.3759	53.4604	121.443		0.455962	2.27164	DUF431 domain protein
AFUA_1G08960	130.686	217.309	388.868		0.601382	1.78947	cAMP-regulated phosphoprotein family protein Igo1, putative
AFUA_1G08970	11.2517	31.1576	53.4296		0.361124	1.71482	conserved hypothetical protein
AFUA_1G08980	44.5318	48.765	105.517		0.913193	2.16379	UPF0160 domain protein MYG1, putative
AFUA_1G08990	43.868	26.1735	46.0703		1.67605	1.76019	lactonohydrolase, putative
AFUA_1G09000	19.0173	17.6164	45.8252		1.07952	2.60127	conserved hypothetical protein
AFUA_1G09010	60.8357	69.1452	136.758		0.879825	1.97784	methionyl-tRNA synthetase
AFUA_1G09020	26.326	45.6866	77.9151		0.576229	1.70543	nuclear pore complex protein (SonA), putative
AFUA_1G09030	1058.23	1051.02	1586.06		1.00686	1.50907	conserved hypothetical protein
AFUA_1G09040	17.7906	10.2918	22.5902		1.72862	2.19497	intermediate filament protein (Mdm1), putative
AFUA_1G09050	9.90199	7.2915	18.0171		1.35802	2.47097	phospholipid methyltransferase
AFUA_1G09060	72.5904	151.448	199.413		0.479309	1.31671	conserved hypothetical protein
AFUA_1G09070	14.7165	21.6137	30.0229		0.680885	1.38907	conserved hypothetical protein
AFUA_1G09080	16.5692	13.2265	24.7444		1.25273	1.87082	hydrolase, alpha/beta fold family protein
AFUA_1G09090	84.963	46.3596	60.2818		1.8327	1.30031	Glutaredoxin domain protein
AFUA_1G09100	769.277	707.499	1109.26		1.08732	1.56787	60S ribosomal protein L9, putative
AFUA_1G09110	22.8207	16.2952	30.8619		1.40046	1.89392	Patatin-like serine hydrolase, putative
AFUA_1G09120	6.64968	5.15755	16.6888		1.28931	3.23579	amino acid permease, putative
AFUA_1G09130	11.6532	17.5876	19.9184		0.662581	1.13253	conserved hypothetical protein
AFUA_1G09140	59.4519	29.3897	29.1241		2.02288	0.990961	conserved hypothetical protein
AFUA_1G09150	20.2521	48.1782	85.3357		0.420358	1.77125	rhomboid family protein, putative
AFUA_1G09160	29.7224	38.7182	57.7351		0.767657	1.49116	conserved hypothetical protein
AFUA_1G09170	12.068	19.223	31.2483		0.627791	1.62557	protein kinase activator (Mob2), putative
AFUA_1G09180	29.3591	54.6166	78.4899		0.537549	1.43711	conserved hypothetical protein
AFUA_1G09190	46.3358	135.927	168.351		0.340886	1.23854	C6 finger domain protein, putative
AFUA_1G09200	9.60032	13.0574	29.5295		0.735239	2.26152	ribosome biogenesis protein Erb1, putative
AFUA_1G09210	31.8314	42.3692	63.8229		0.751286	1.50635	AAA family ATPase/60S ribosome export protein Rix7, putative
AFUA_1G09220	48.4084	41.1219	64.2891		1.17719	1.56338	SNF7 family protein
AFUA_1G09230	23.9933	22.1294	63.6661		1.08422	2.87698	DUF1000 domain protein
AFUA_1G09240	61.9764	118.147	136.391		0.524569	1.15442	ATP dependent RNA helicase, putative
AFUA_1G09250	25.5367	44.9352	73.0165		0.568301	1.62493	CUE domain protein, putative
AFUA_1G09260	10.412	1.1152	9.47249		9.33637	8.49396	acetyltransferase, GNAT family family
AFUA_1G09270	14.7029	17.2062	21.9223		0.854516	1.27409	transmembrane glycoprotein, putative
AFUA_1G09280	85.7558	81.8806	105.222		1.04733	1.28506	protein phosphatase 2C, putative
AFUA_1G09290	66.7772	41.7891	92.6068		1.59796	2.21605	cholinephosphate cytidylyltransferase
AFUA_1G09300	0.635075	3.40108	7.22215		0.186727	2.12349	hypothetical protein
AFUA_1G09310	12.7833	9.73649	36.1818		1.31293	3.71611	DUF6 domain protein, putative
AFUA_1G09320	8.66424	7.73341	40.3976		1.12036	5.22378	nucleolus protein required for cell viability, putative
AFUA_1G09330	43.822	40.9289	99.1915		1.07069	2.4235	eukaryotic translation initiation factor 3 subunit EifCf, putative
AFUA_1G09340	2.31782	2.48257	6.32606		0.933637	2.54819	hypothetical protein
AFUA_1G09350	55.5786	64.7434	102.235		0.858445	1.57908	transcription initiation factor TFIID subunit 13, putative
AFUA_1G09360	100.59	69.7138	183.027		1.44289	2.6254	S-adenosylmethionine-dependent methyltransferase, putative
AFUA_1G09370	15.4726	11.4131	23.1067		1.35569	2.02459	pentatricopeptide repeat protein
AFUA_1G09380	32.2668	23.6802	58.1672		1.36261	2.45636	conserved hypothetical protein
AFUA_1G09390	25.3882	18.9918	38.4958		1.3368	2.02697	conserved hypothetical protein
AFUA_1G09400	31.6638	51.7998	92.8698		0.611274	1.79286	R3H domain protein, putative
AFUA_1G09410	47.8977	67.9588	100.168		0.704805	1.47395	50S ribosomal protein L17
AFUA_1G09420	52.6956	55.3763	47.0364		0.951592	0.849396	conserved hypothetical protein
AFUA_1G09430	25.89	19.5139	35.7671		1.32675	1.83291	conserved hypothetical protein
AFUA_1G09440	483.536	572.187	822.368		0.845065	1.43724	ribosomal protein S23 (S12)
AFUA_1G09450	27.568	22.4409	47.1515		1.22847	2.10114	translation regulator GCD7
AFUA_1G09460	19.6323	16.2714	35.0838		1.20655	2.15616	NIF domain protein
AFUA_1G09470	91.8364	36.5928	90.1086		2.50969	2.46247	aminotransferase, class V, putative
AFUA_1G09480	33.4192	32.4803	60.2446		1.02891	1.8548	vacuolar protein sorting 29, putative
AFUA_1G09490	160.048	172.627	242.678		0.927131	1.40579	RNP domain protein
AFUA_1G09500	50.9515	67.9063	129.449		0.75032	1.90629	ubiquitin-protein ligase (Rsp5), putative
AFUA_1G09510	10.9608	9.3919	42.5463		1.16705	4.53011	GPI anchored serine-threonine rich protein
AFUA_1G09520	9.30685	9.6361	30.1993		0.965832	3.13398	conserved hypothetical protein
AFUA_1G09530	8.70009	19.1746	23.7452		0.45373	1.23837	conserved hypothetical protein
AFUA_1G09540	56.7368	88.0112	135.273		0.644654	1.537	vacuolar transporter chaperon Vtc1, putative
AFUA_1G09550	151.624	194.882	232.204		0.778031	1.19151	dynein light chain (Tctex1), putative
AFUA_1G09560	39.9471	31.2311	43.2399		1.27908	1.38451	protein transport protein (LST8), putative
AFUA_1G09570	47.5388	45.8664	36.556		1.03646	0.79701	conserved hypothetical protein
AFUA_1G09580	50.6359	41.2834	53.974		1.22654	1.3074	conserved hypothetical protein
AFUA_1G09590	42.4815	44.3564	43.0237		0.957731	0.969955	conserved hypothetical protein
AFUA_1G09600	87.0501	68.7818	130.262		1.2656	1.89384	N-acetyltransferase complex ARD1 subunit, putative
AFUA_1G09610	52.0099	71.8323	80.4701		0.724045	1.12025	conserved hypothetical protein
AFUA_1G09620	17.618	26.218	88.6524		0.671981	3.38135	protein kinase family protein
AFUA_1G09630	58.4858	42.1151	69.6325		1.38871	1.65338	PAB1 binding protein (Pbp1), putative
AFUA_1G09640	5.51361	4.6752	13.0628		1.17933	2.79406	actin-interacting protein (Bud6/Aip3), putative
AFUA_1G09650	13.1782	17.9644	24.2507		0.733572	1.34993	GPI anchored protein, putative
AFUA_1G09660	15.0633	16.134	22.3594		0.933637	1.38586	mitochondrial 2-oxodicarboxylate carrier protein, putative
AFUA_1G09670	69.4517	231.689	189.994		0.299763	0.820041	HLH transcription factor (GlcD gamma), putative
AFUA_1G09680	198.642	555.443	417.626		0.357627	0.751879	Golgi traffic protein SFT2, putative
AFUA_1G09690	28.4727	11.514	15.8593		2.47288	1.3774	tRNA ligase
AFUA_1G09700	61.7524	41.9291	86.7788		1.47278	2.06965	ankyrin repeat protein
AFUA_1G09710	35.113	15.3854	30.4927		2.28222	1.98192	hypothetical protein
AFUA_1G09720	24.0711	19.7157	59.2565		1.22091	3.00555	hypothetical protein
AFUA_1G09730	87.3766	41.839	72.6345		2.0884	1.73605	PAP2 domain protein
AFUA_1G09750	3264.16	519.267	288.483		6.28609	0.555558	aldehyde reductase (AKR1), putative
AFUA_1G09754	585.047	182.207	113.046		3.2109	0.620428	DUF636 domain protein
AFUA_1G09757	198.49	86.6142	127.075		2.29166	1.46714	cytochrome c oxidase assembly protein Cox19, putative
AFUA_1G09760	52.6014	41.4085	78.9741		1.2703	1.90719	UPF0171 domain protein
AFUA_1G09770	34.0625	28.8897	44.0296		1.17905	1.52406	La domain family
AFUA_1G09780	25.0869	23.3268	43.3894		1.07546	1.86007	stomatin family protein
AFUA_1G09790	7.55216	9.08453	17.9696		0.831321	1.97804	histone transcription regulator Hir1, putative
AFUA_1G09800	102.567	84.2021	162.878		1.21811	1.93437	GTP-binding protein YchF
AFUA_1G09810	60.9811	29.108	116.385		2.09499	3.99837	PUA RNA binding domain protein, putative
AFUA_1G09820	4.87465	8.3781	19.6988		0.581832	2.35123	DUF1339 domain protein
AFUA_1G09830	71.9993	44.8266	113.581		1.60617	2.53379	Hsc70 cochaperone (SGT), putative
AFUA_1G09840	16.4356	33.72	45.4896		0.487414	1.34904	mitochondrial inner membrane translocase subunit TIM44, putative
AFUA_1G09850	21.3341	13.7103	31.0545		1.55606	2.26505	37S ribosomal protein S11, putative
AFUA_1G09870	6.76459	6.4514	19.0528		1.04855	2.95328	VPS9 domain protein, putative
AFUA_1G09880	14.7029	21.3255	22.0152		0.689455	1.03234	conserved hypothetical protein
AFUA_1G09890	770.694	289.946	222.055		2.65806	0.765848	conserved hypothetical protein
AFUA_1G09900	14.0426	18.412	33.4808		0.76269	1.81842	alpha-L-arabinofuranosidase
AFUA_1G09910	3.11024	7.61443	15.7649		0.408466	2.0704	MFS sugar transporter, putative
AFUA_1G09920	13.6951	33.5281	46.2777		0.408466	1.38027	conserved hypothetical protein
AFUA_1G09930	135.498	70.8266	79.3519		1.9131	1.12037	glycerol dehydrogenase Gcy1, putative
AFUA_1G09940	335.763	1420.6	737.226		0.236352	0.518952	conserved hypothetical protein
AFUA_1G09950	49.3421	84.5589	174.323		0.583523	2.06155	casein kinase 2 beta' regulatory subunit Ckb2, putative
AFUA_1G09960	19.2604	26.3354	65.2434		0.731349	2.4774	conserved hypothetical protein
AFUA_1G09970	55.0155	78.8047	156.185		0.698125	1.98192	eukaryotic translation initiation factor 3 subunit EifCh, putative
AFUA_1G09980	77.9781	43.4308	73.4646		1.79546	1.69153	mitochondrial carrier protein, putative
AFUA_1G10012	15.6495	15.9541	22.8142		0.98091	1.43	conserved hypothetical protein
AFUA_1G10020	43.7115	9.36369	11.9302		4.66819	1.27409	ribonuclease H1, putative
AFUA_1G10030	25.8137	9.932	17.3284		2.59904	1.7447	hypothetical protein
AFUA_1G10040	62.4692	91.5945	120.011		0.682019	1.31024	HMG box protein, putative
AFUA_1G10050	43.3355	193.381	241.014		0.224094	1.24631	DEAD/DEAH box RNA helicase
AFUA_1G10060	14.9655	17.7165	39.4123		0.84472	2.22461	conserved hypothetical protein
AFUA_1G10080	107.066	88.5103	117.892		1.20965	1.33196	C2H2 transcription factor, putative
AFUA_1G10090	617.524	606.299	448.664		1.01851	0.740004	hypothetical protein
AFUA_1G10100	113.509	86.2168	106.642		1.31656	1.23691	3-oxoacyl-(acyl-carrier-protein) reductase
AFUA_1G10110	121.299	48.7205	66.6068		2.4897	1.36712	TIM-barrel enzyme family protein
AFUA_1G10120	44.0833	11.729	22.7351		3.75849	1.93836	UPF0261 domain protein
AFUA_1G10130	156.305	48.2482	100.973		3.23961	2.09279	adenosylhomocysteinase
AFUA_1G10140	17.2668	10.6341	16.4943		1.62372	1.55107	integral membrane protein
AFUA_1G10150	18.3187	7.95436	10.3598		2.30297	1.30241	conserved hypothetical protein
AFUA_1G10160	2.63694	1.61393	2.0563		1.63387	1.27409	conserved hypothetical protein
AFUA_1G10170	8.61297	3.45944	12.7332		2.4897	3.68071	conserved hypothetical protein
AFUA_1G10180	14.6475	10.2956	20.8216		1.42269	2.02237	conserved hypothetical protein
AFUA_1G10190	43.3878	88.4464	92.528		0.490555	1.04615	pre-mRNA splicing factor (Prp31), putative
AFUA_1G10200	23.1132	26.867	61.453		0.86028	2.2873	cell cycle control protein (Cwf4), putative
AFUA_1G10210	1.96436	1.22733	9.82915		1.60052	8.00859	conserved hypothetical protein
AFUA_1G10220	30.4483	4.05453	2.24602		7.50969	0.553954	conserved hypothetical protein
AFUA_1G10270	68.5605	24.2089	45.9239		2.83203	1.89698	pyridoxal reductase (AKR8), putative
AFUA_1G10280	39.0678	29.6963	112.648		1.31558	3.79332	C2H2 finger domain protein (Gli3), putative
AFUA_1G10290	14.8838	13.2138	25.0542		1.12639	1.89607	chromodomain helicase (Chd1), putative
AFUA_1G10300	1.91023	1.023	18.2476		1.86727	17.8373	hypothetical protein
AFUA_1G10310	150.935	58.3169	83.3929		2.58818	1.43	RNase L inhibitor of the ABC superfamily, putative
AFUA_1G10320	48.4584	40.4053	90.8227		1.19931	2.24779	formin binding protein (FNB3), putative
AFUA_1G10330	20.0695	25.5118	48.556		0.786676	1.90328	conserved hypothetical protein
AFUA_1G10340	634.909	358.746	558.732		1.7698	1.55746	integral membrane protein, Mpv17/PMP22 family, putative
AFUA_1G10350	573.705	144.84	257.406		3.96095	1.77717	phosphoglycerate kinase PgkA, putative
AFUA_1G10355	363.898	159.308	377.045		2.28424	2.36676	26 proteasome complex subunit Sem1, putative
AFUA_1G10360	85.0432	60.6657	77.0658		1.40183	1.27033	conserved hypothetical protein
AFUA_1G10370	58.9168	25.9842	35.6682		2.26741	1.37268	MFS multidrug transporter, putative
AFUA_1G10380	5.10734	0.849565	0.897621		6.01171	1.05657	nonribosomal peptide synthase Pes1
AFUA_1G10400	5.26184	4.44936	11.2538		1.18261	2.52931	conserved hypothetical protein
AFUA_1G10410	3.47563	7.44534	20.8693		0.466819	2.80301	DNA repair protein RAD51, putative
AFUA_1G10420	11.341	2.64068	10.3177		4.29473	3.90722	hypothetical protein
AFUA_1G10430	10.3675	12.2148	22.1652		0.848761	1.81462	conserved hypothetical protein
AFUA_1G10440	8.15603	12.2672	16.5769		0.664863	1.35131	conserved hypothetical protein
AFUA_1G10450	1.14704	1.38214	4.17417		0.8299	3.02007	conserved hypothetical protein
AFUA_1G10460	35.042	13.4733	62.1255		2.60085	4.611	conserved hypothetical protein
AFUA_1G10470	17.3285	59.7461	61.258		0.290035	1.02531	conserved hypothetical protein
AFUA_1G10480	12.4233	21.4379	33.9069		0.579499	1.58163	DNA polymerase POL4, putative
AFUA_1G10490	25.2007	22.3133	43.4081		1.1294	1.94539	F1F0 ATP synthase assembly protein Atp10, putative
AFUA_1G10497	81.3982	84.3348	145.687		0.965179	1.72749	#N/A
AFUA_1G10510	433.467	307.608	668.078		1.40915	2.17185	60S ribosomal protein L35
AFUA_1G10525	14.8452	13.8619	38.324		1.07094	2.7647	RNA polymerase II Mediator complex subunit Sin4, putative
AFUA_1G10540	38.658	20.9142	38.2203		1.84841	1.82749	SIR2 family histone deacetylase (Hst4), putative
AFUA_1G10550	45.4337	55.0903	110.355		0.824713	2.00316	CBF/NF-Y family transcription factor, putative
AFUA_1G10560	23.0547	24.4128	95.3387		0.944369	3.90527	GTP binding protein, putative
AFUA_1G10570	42.3019	52.9511	252.239		0.798886	4.76362	glycerol-3-phosphate phosphatase (GppA), putative
AFUA_1G10580	14.7714	14.8907	45.375		0.99199	3.04721	homeobox transcription factor, putative
AFUA_1G10590	12.1977	19.2341	38.8399		0.634169	2.01932	GPI anchored protein, putative
AFUA_1G10600	35.8233	59.2498	70.639		0.604615	1.19222	nuclear localization protein, putative
AFUA_1G10610	1725.22	547.154	263.59		3.15308	0.481747	conserved hypothetical protein
AFUA_1G10620	14.026	8.20702	8.9796		1.70903	1.09414	conserved hypothetical protein
AFUA_1G10630	353.581	144.655	142.209		2.44431	0.983097	S-adenosylmethionine synthetase
AFUA_1G10640	33.0066	22.0954	42.0398		1.49382	1.90265	ATP binding protein, putative
AFUA_1G10645	19.5054	33.2964	72.6454		0.585812	2.18178	conserved hypothetical protein
AFUA_1G10650	11.5466	5.86494	16.6777		1.96876	2.84363	conserved hypothetical protein
AFUA_1G10660	19.0412	27.4446	66.9399		0.693804	2.43909	C6 finger domain protein, putative
AFUA_1G10670	53.8266	62.7953	139.782		0.857176	2.226	Vacuolar ATP synthase subunit H, putative
AFUA_1G10690	38.3632	29.2655	66.7902		1.31086	2.28221	M protein repeat protein
AFUA_1G10700	84.0147	47.9218	93.1682		1.75316	1.94417	proteasome regulatory particle subunit (Nas6), putative
AFUA_1G10710	31.7943	43.4979	85.0751		0.73094	1.95585	mRNA splicing protein (Prp5), putative
AFUA_1G10720	2.61024	2.79577	6.28602		0.933637	2.2484	origin recognition complex subunit Orc1, putative
AFUA_1G10730	25.7907	3.74259	10.7478		6.89113	2.87177	conserved hypothetical protein
AFUA_1G10740	49.5306	23.8189	68.052		2.07947	2.85706	prefoldin subunit 5, putative
AFUA_1G10750	7.25722	14.6578	26.4096		0.495111	1.80175	prolyl-tRNA synthetase
AFUA_1G10760	12.3152	15.2917	32.918		0.805351	2.15267	CCAAT-box-binding transcription factor
AFUA_1G10770	68.3376	20.6515	38.6352		3.30909	1.87082	neutral amino acid permease, putative
AFUA_1G10780	61.648	14.9703	38.6014		4.11801	2.57852	glycine cleavage system T protein
AFUA_1G10790	8.37543	3.55737	11.2982		2.35439	3.176	alpha-1,2-mannosidase family protein, putative
AFUA_1G10800	17.8839	16.2402	46.3348		1.10121	2.8531	thioesterase family protein
AFUA_1G10810	58.1742	70.9264	143.292		0.820205	2.02029	vacuolar ATP synthase subunit c
AFUA_1G10820	30.3248	44.1242	60.3827		0.687261	1.36847	adenylylsulfate kinase
AFUA_1G10830	16.2566	49.5576	66.3102		0.328035	1.33804	succinyl-CoA synthetase subunit alpha, putative
AFUA_1G10840	347.44	335.575	373.764		1.03536	1.1138	conserved hypothetical protein
AFUA_1G10850	193.563	525.214	514.205		0.368541	0.97904	ubiquitin-like modifier SUMO, putative
AFUA_1G10860	18.7658	25.1851	55.1258		0.745114	2.18883	nuclear pore complex protein Nup107, putative
AFUA_1G10870	635.989	234.877	272.641		2.70775	1.16078	urea hydro-lyase/cyanamide hydratase, putative
AFUA_1G10880	92.4347	41.4334	42.9713		2.23092	1.03712	P-type calcium ATPase, putative
AFUA_1G10890	55.8552	12.5813	30.9691		4.43954	2.46151	purine-cytosine permease, putative
AFUA_1G10900	16.6544	6.83796	25.0002		2.43558	3.65609	conserved hypothetical protein
AFUA_1G10910	1.03897	0.834612	8.03438		1.24485	9.62648	tubulin beta, putative
AFUA_1G10920	459.773	412.073	389.864		1.11576	0.946102	nuclear mRNA splicing factor-associated protein, putative
AFUA_1G10930	131.751	115.486	195.685		1.14085	1.69446	ammonium transporter (Mep2), putative
AFUA_1G10940	15.7366	20.8639	45.0395		0.754249	2.15873	MAP kinase kinase kinase SskB, putative
AFUA_1G10950	74.392	166.425	220.042		0.447001	1.32217	vesicle-mediated transport protein Vid24, putative
AFUA_1G10960	111.126	182.728	365.238		0.608149	1.99881	Mago nashi domain protein
AFUA_1G10970	14.3377	17.2594	41.9024		0.830717	2.4278	Coatomer subunit beta, putative
AFUA_1G10980	29.6399	17.0738	56.6502		1.73598	3.31795	sphingosine kinase (SphK), putative
AFUA_1G10990	3.34875	5.57944	30.8045		0.600195	5.52107	ribosomal RNA processing protein, putative
AFUA_1G11000	6.09544	49.4549	44.9182		0.123252	0.908265	C6 transcription factor, putative
AFUA_1G11010	1.42148	5.58255	3.87965		0.254628	0.69496	short chain oxidoreductase/dehydrogenase, putative
AFUA_1G11020	0.673885	1.08268	0.919621		0.622425	0.849396	L-arabinitol 4-dehydrogenase
AFUA_1G11040	0.998348	3.20793	4.99547		0.311212	1.55723	conserved hypothetical protein
AFUA_1G11050	3.91288	52.0178	48.5811		0.075222	0.933933	MFS sugar transporter, putative
AFUA_1G11060	93.6836	112.324	103.676		0.834049	0.92301	ubiquitin domain protein, putative
AFUA_1G11070	34.4322	74.6954	92.3861		0.460969	1.23684	G-patch domain protein, putative
AFUA_1G11080	17.2962	18.8888	35.9963		0.915683	1.9057	serine/threonine protein kinase Kin1, putative
AFUA_1G11090	50.2754	33.62	35.8168		1.4954	1.06534	histone-lysine N-methyltransferase Clr4
AFUA_1G11100	22.8736	8.90888	19.5485		2.5675	2.19427	hypothetical protein
AFUA_1G11110	20.8822	6.47773	13.2882		3.22369	2.05137	calcium channel subunit Cch1
AFUA_1G11120	103.439	66.5547	134.727		1.5542	2.02431	conserved hypothetical protein
AFUA_1G11130	436.315	577.212	977.818		0.755901	1.69404	60S ribosomal protein L6
AFUA_1G11140	170.029	79.9804	136.827		2.12589	1.71075	Sterol desaturase family
AFUA_1G11150	27.0287	28.5968	66.5726		0.945164	2.32797	3-ketosphinganine reductase (Tsc10), putative
AFUA_1G11160	14.0876	13.7172	29.7941		1.027	2.17203	Sas10/Utp3 family protein
AFUA_1G11170	8.32017	7.66082	13.4125		1.08607	1.75079	DNA mismatch repair protein Msh5, putative
AFUA_1G11180	33.8969	56.983	59.8791		0.59486	1.05082	heat shock protein/chaperonin HSP78, putative
AFUA_1G11190	842.711	540.769	643.735		1.55836	1.19041	eukaryotic translation elongation factor 1 subunit Eef1-beta, putative
AFUA_1G11200	379.61	813.186	1946.93		0.466819	2.3942	conserved hypothetical protein
AFUA_1G11210	13.6675	23.7884	32.6401		0.574546	1.3721	hypothetical protein
AFUA_1G11220	44.4764	151.575	570.165		0.293429	3.76161	GPI anchored protein, putative
AFUA_1G11230	2.51043	1.09999	0.622885		2.28222	0.566264	HMG-CoA reductase
AFUA_1G11240	1.95644	2.0955	8.89956		0.933637	4.24698	hypothetical protein
AFUA_1G11250	30.7853	10.4275	10.054		2.95231	0.964179	amidohydrolase, putative
AFUA_1G11270	0.905219	0.727171	1.23531		1.24485	1.69879	conserved hypothetical protein
AFUA_1G11280	1.01647	1.81454	0.616506		0.560182	0.339758	oxidoreductase, putative
AFUA_1G11290	2.494	0.242843	1.03135		10.27	4.24698	C6 finger domain protein, putative
AFUA_1G11300	1.29501	1.38706	1.9636		0.933637	1.41566	methyltransferase, putative
AFUA_1G11310	3.51324	0.396101	10.2616		8.86956	25.9066	AMP-binding enzyme domain protein
AFUA_1G11320	4.84121	0.864221	9.78754		5.60182	11.3253	class II DAHP synthetase family protein
AFUA_1G11330	6.02389	1.1731	7.97143		5.13501	6.79516	lactonohydrolase, putative
AFUA_1G11340	3.2847	1.50779	4.48249		2.17849	2.97288	glycosyl hydrolase family 88, putative
AFUA_1G11350	3.86159	3.16288	7.23297		1.22091	2.28683	MFS transporter of unkown specificity
AFUA_1G11360	15.8067	10.6734	14.0679		1.48094	1.31803	aldehyde reductase II
AFUA_1G11370	35.0244	6.99413	14.942		5.00769	2.13636	versicolorin B synthase, putative
AFUA_1G11380	2.25224	4.13542	11.416		0.544622	2.76054	integral membrane protein, putative
AFUA_1G11390	5.93312	13.6511	19.5919		0.434624	1.43519	cytochrome P450, putative
AFUA_1G11400	13.2477	14.1894	38.7936		0.933637	2.73399	alpha/beta fold family hydrolase, putative
AFUA_1G11410	11.3364	68.9068	85.6021		0.164518	1.24229	ubiquitin conjugating enzyme E2, putative
AFUA_1G11420	121.651	200.393	186.538		0.607062	0.930861	cell wall biogenesis protein phosphatase Ssd1, putative
AFUA_1G11430	6.18874	21.2116	11.2607		0.291762	0.530872	hypothetical protein
AFUA_1G11440	2.77256	6.18673	7.98757		0.448146	1.29108	RNA export mediator Gle1, putative
AFUA_1G11450	0.524349	1.37285	5.30041		0.381943	3.86089	myosin class II heavy chain (MHC), putative
AFUA_1G11460	28.1446	183.418	795.562		0.153445	4.33742	1,3-beta-glucanosyltransferase Bgt1
AFUA_1G11470	34.8943	49.2396	124.464		0.708665	2.52772	endosomal cargo receptor (P24), putative
AFUA_1G11480	21.9371	26.2607	89.2228		0.83536	3.39758	conserved hypothetical protein
AFUA_1G11490	170.831	89.0667	106.901		1.91802	1.20023	vacuolar endopolyphosphatase, putative
AFUA_1G11500	9.66879	8.1593	10.3957		1.185	1.27409	conserved hypothetical protein
AFUA_1G11510	64.4403	40.1944	44.8315		1.60322	1.11537	conserved hypothetical protein
AFUA_1G11520	10.1355	6.82874	11.8981		1.48424	1.74235	fungal specific transcription factor, putative
AFUA_1G11530	67.5319	22.575	50.4813		2.99145	2.23616	2,4-dihydroxyhept-2-ene-1,7-dioic acid aldolase
AFUA_1G11535	22.1605	31.2311	70.0327		0.709564	2.2424	conserved hypothetical protein
AFUA_1G11540	19.2539	14.0232	57.4544		1.373	4.09708	CORD and CS domain protein
AFUA_1G11550	51.4173	10.6493	30.4961		4.82824	2.86368	ethanolamine kinase, putative
AFUA_1G11560	71.4318	4.6916	15.9401		15.2255	3.39758	4-hydroxyphenylpyruvate dioxygenase, putative
AFUA_1G11570	5.61877	0.708018	6.61526		7.93592	9.34335	quinate utilisation oxidoreductase QutH
AFUA_1G11580	3.5742	2.39266	8.12925		1.49382	3.39758	MFS quinate transporter QutD
AFUA_1G11590	2.69554	2.88714	15.0205		0.933637	5.20255	quinate 5-dehydrogenase QutB, putative
AFUA_1G11600	21.6213	9.81278	29.6724		2.20338	3.02385	inositol monophosphatase QutG, putative
AFUA_1G11610	14.4595	7.74365	21.1939		1.86727	2.73694	3-dehydroquinate dehydratase QutE
AFUA_1G11620	7.22976	3.15482	14.6165		2.29166	4.63307	C6 transcription factor QutA, putative
AFUA_1G11630	8.93646	7.03799	15.5429		1.26975	2.20843	quinate pathway repressor protein QutR, putative
AFUA_1G11640	36.062	5.26708	13.4215		6.84667	2.54819	cytosolic Cu/Zn superoxide dismutase, putative
AFUA_1G11650	18.302	4.37937	12.3994		4.17914	2.83132	flavin-binding monooxygenase, putative
AFUA_1G11660	6.73054	10.5731	43.9513		0.636571	4.15689	conserved hypothetical protein
AFUA_1G11670	23.2797	28.8714	47.9318		0.806323	1.66018	small nuclear ribonucleoprotein Lsm8, putative
AFUA_1G11690	21.5466	19.3742	29.7667		1.11213	1.53641	proline-rich, actin-associated protein Vrp1, putative
AFUA_1G11700	14.5218	8.8444	17.8743		1.64191	2.02098	conserved hypothetical protein
AFUA_1G11710	260.404	156.74	368.017		1.66138	2.34795	60S ribosomal protein L1
AFUA_1G11715	7.50305	18.3051	32.6134		0.40989	1.78166	conserved hypothetical protein
AFUA_1G11720	1.93563	8.5232	5.47859		0.227101	0.642786	conserved hypothetical protein
AFUA_1G11730	143.713	384.821	643.535		0.373455	1.6723	ADP-ribosylation factor, putative
AFUA_1G11740	138.235	113.742	55.3855		1.21534	0.486938	conserved hypothetical protein
AFUA_1G11760	30.1013	31.2832	63.4471		0.962218	2.02815	conserved hypothetical protein
AFUA_1G11770	7.98022	13.2485	35.2118		0.602347	2.65779	COPII-coated vesicle protein SurF4/Erv29, putative
AFUA_1G11780	23.5357	16.4825	37.8829		1.42792	2.29836	conserved hypothetical protein
AFUA_1G11790	5.56632	6.70721	12.6602		0.8299	1.88755	nucleoside hydrolase, putative
AFUA_1G11800	4.54872	12.6673	47.1766		0.359091	3.72427	HLH transcription factor, putative
AFUA_1G11810	1.76051	2.45134	6.24648		0.718183	2.54819	conserved hypothetical protein
AFUA_1G11820	3.83724	0.228333	3.10311		16.8055	13.5903	MFS transporter, putative
AFUA_1G11830	3.32979	2.03798	13.4156		1.63387	6.58282	MFS sugar transporter, putative
AFUA_1G11840	17.0245	18.2346	48.4011		0.933637	2.65436	hypothetical protein
AFUA_1G11850	13.3617	14.5351	34.189		0.919274	2.35217	conserved hypothetical protein
AFUA_1G11860	157.521	174.131	336.428		0.904612	1.93204	mitochondrial import receptor subunit tom22
AFUA_1G11870	26.4691	27.904	59.5383		0.948576	2.13368	mitochondrial processing peptidase alpha subunit, putative
AFUA_1G11880	11.0902	6.49606	22.0709		1.70722	3.39758	acetoacetyl-CoA synthase
AFUA_1G11890	23.5118	14.4993	14.9084		1.62158	1.02822	serine palmitoyltransferase 2, putative
AFUA_1G11900	16.5663	15.9394	38.8284		1.03933	2.436	PQ loop repeat protein
AFUA_1G11910	33.0368	21.6535	37.682		1.5257	1.74023	conserved histidine-rich protein
AFUA_1G11920	171.274	96.0435	60.8604		1.7833	0.633676	SH3 domain protein, putative
AFUA_1G11930	98.5439	139.59	173.145		0.705954	1.24039	protein kinase, putative
AFUA_1G11940	24.567	11.1009	34.5731		2.21307	3.11445	50S ribosomal subunit protein L15
AFUA_1G11950	57.5925	295.122	173.517		0.195148	0.58795	mucin, putative
AFUA_1G11960	35.3455	18.9289	22.4729		1.86727	1.18722	alternative NADH-dehydrogenase
AFUA_1G11970	41.577	74.6446	89.1002		0.557	1.19366	mitochondrial dynamin GTPase (Msp1), putative
AFUA_1G11980	25.5023	18.9104	34.8018		1.34859	1.84036	glutamine amidotransferase, putative
AFUA_1G11990	20.1102	10.5988	21.7805		1.89739	2.05499	conserved hypothetical protein
AFUA_1G12000	23.7648	32.3477	52.6999		0.734665	1.62917	nuclear and cytoplasmic polyadenylated RNA-binding protein pub1
AFUA_1G12010	30.3248	57.3418	80.7223		0.528844	1.40774	conserved hypothetical protein
AFUA_1G12020	422.39	189.223	195.118		2.23223	1.03115	arrestin domain protein
AFUA_1G12025	19.0934	26.4654	52.1119		0.721447	1.96905	antibiotic biosynthesis monooxygenase, putative
AFUA_1G12030	66.1633	60.18	77.8692		1.09942	1.29394	conserved hypothetical protein
AFUA_1G12040	14.6144	22.3058	45.5379		0.655184	2.04153	chitin biosynthesis protein (Chs7), putative
AFUA_1G12050	19.804	27.3984	122.366		0.722816	4.46618	acetyltransferase, GNAT family family
AFUA_1G12060	15.5342	17.7004	42.9992		0.877619	2.42927	acyl-CoA thioesterase
AFUA_1G12065	187.915	121.402	256.891		1.54787	2.11604	37S ribosomal protein Mrp17
AFUA_1G12070	330.816	115.157	216.947		2.87273	1.88392	glycine cleavage system H protein
AFUA_1G12080	182.025	170.37	166.15		1.06841	0.975232	RING finger ubiquitin ligase (Tul1), putative
AFUA_1G12090	86.0075	64.9606	71.3499		1.32399	1.09836	cation efflux family protein family
AFUA_1G12100	9.23803	6.45304	23.7518		1.43158	3.68071	conserved hypothetical protein
AFUA_1G12110	170.083	153.928	215.911		1.10495	1.40267	NADH-ubiquinone oxidoreductase 14 kDa subunit, putative
AFUA_1G12120	12.8976	6.74275	17.4612		1.91282	2.58962	arginine rich protein
AFUA_1G12130	7.7756	8.32828	21.6936		0.933637	2.60481	translation initiation factor eIF4E, putative
AFUA_1G12140	52.8009	56.554	93.044		0.933637	1.64523	conserved hypothetical protein
AFUA_1G12150	41.8771	54.3916	66.3441		0.769919	1.21975	nucleoside diphosphatase Gda1
AFUA_1G12160	24.3314	23.3782	79.1037		1.04078	3.38366	translation initiation factor IF3, putative
AFUA_1G12170	92.1435	136.403	282.267		0.675526	2.06937	translation elongation factor EF-Tu, putative
AFUA_1G12180	57.4945	109.645	67.4885		0.524372	0.615521	GTP-binding protein Sey1, putative
AFUA_1G12190	37.0946	25.0307	51.2963		1.48196	2.04934	conserved hypothetical protein
AFUA_1G12200	357.624	95.9476	224.197		3.72728	2.33666	conserved hypothetical protein
AFUA_1G12210	41.4326	10.5105	24.5508		3.94202	2.33584	NADH oxidase
AFUA_1G12220	11.2215	9.72978	26.2517		1.15332	2.69808	conserved hypothetical protein
AFUA_1G12230	14.5461	6.86576	11.4392		2.11864	1.66612	ankyrin repeat protein
AFUA_1G12240	5.02067	4.30203	4.01954		1.16705	0.934335	MFS peptide transporter, putaitve
AFUA_1G12250	2371.42	789.187	347.883		3.0049	0.440812	mitochondrial hypoxia responsive domain protein
AFUA_1G12260	87.5604	56.5	104.995		1.54974	1.85832	transcriptional elongation factor Iws1, putative
AFUA_1G12270	18.1949	17.8642	38.6241		1.01851	2.1621	hypothetical protein
AFUA_1G12280	27.8696	34.115	74.8576		0.816933	2.19427	nucleoporin, putative
AFUA_1G12290	186.22	123.517	268.892		1.50765	2.17697	NADH-ubiquinone oxidoreductase 19 kDa subunit, putative
AFUA_1G12300	14.925	11.9167	29.1316		1.25244	2.4446	Acyl CoA binding protein, putative
AFUA_1G12310	6.64968	3.43837	17.9404		1.93396	5.21772	GABA permease, putative
AFUA_1G12320	2.05592	23.4886	22.445		0.0875285	0.95557	hypothetical protein
AFUA_1G12332	23.8705	145.878	88.2528		0.163633	0.604977	jumonji family transcription factor, putative
AFUA_1G12340	166.236	353.273	101.938		0.47056	0.288552	carnitine acetyl transferase
AFUA_1G12350	34.0092	91.8758	26.8151		0.370165	0.291863	SCP-like extracellular protein, putative
AFUA_1G12370	251.848	157.53	137.391		1.59873	0.872163	DUF255 domain protein
AFUA_1G12380	133.204	122.34	131.43		1.08881	1.07431	WD repeat protein
AFUA_1G12390	26.9783	27.3518	50.0249		0.986343	1.82894	G2/M phase checkpoint control protein Sum2, putative
AFUA_1G12400	22.9485	6.32049	18.1936		3.63081	2.87851	conserved hypothetical protein
AFUA_1G12410	22.2425	23.2695	16.7061		0.955867	0.717941	salicylate hydroxylase, putative
AFUA_1G12420	25.825	46.1011	50.5495		0.560182	1.09649	hypothetical protein
AFUA_1G12440	21.8417	20.8877	46.8386		1.04567	2.2424	isoflavone reductase family protein CipA, putative
AFUA_1G12450	3.60021	4.74598	10.078		0.75858	2.12349	conserved hypothetical protein
AFUA_1G12460	25.5581	24.7676	32.1098		1.03192	1.29645	oxidoreductase CipA-like, putative
AFUA_1G12475	186.103	372.856	220.709		0.499128	0.591942	conserved hypothetical protein
AFUA_1G12480	8.61189	4.12137	5.00096		2.08957	1.21342	nuclear RNA binding protein, putative
AFUA_1G12490	16.3574	1.3652	11.7892		11.9817	8.63552	sexual development activator VeA
AFUA_1G12500	1.18921	2.54748	3.24572		0.466819	1.27409	hypothetical protein
AFUA_1G12510	8.08662	3.71204	7.7073		2.17849	2.0763	isoflavone reductase family protein
AFUA_1G12520	31.2608	13.6337	25.0341		2.2929	1.83619	DNA repair protein (Rad57), putative
AFUA_1G12530	88.0065	18.2443	36.1587		4.82379	1.98192	oleate delta-12 desaturase
AFUA_1G12540	11.4243	6.56804	14.4439		1.73938	2.19912	TMEM1 family protein, putative
AFUA_1G12550	24.4666	43.7377	54.8638		0.559395	1.25438	membrane-tethered transcription factor (SPT23), putative
AFUA_1G12560	2.27031	1.38953	4.42598		1.63387	3.18523	endoglucanase, putative
AFUA_1G12570	13.1887	11.7387	42.418		1.12353	3.61353	RNA binding protein Ligatin/Tma64, putative
AFUA_1G12580	8.54221	5.48963	12.4343		1.55606	2.26505	hypothetical protein
AFUA_1G12590	66.8818	41.3534	64.4426		1.61732	1.55834	RNA-binding La domain protein
AFUA_1G12600	0.167079	0.536865	6.08014		0.311212	11.3253	chitin synthase D
AFUA_1G12610	70.9135	89.9455	103.409		0.788405	1.14969	Hsp70 chaperone Hsp88
AFUA_1G12620	30.7643	14.5926	24.7898		2.10821	1.69879	MFS toxin efflux pump (AflT), putative
AFUA_1G12630	10.4777	12.949	34.0962		0.809152	2.63313	mannosylphosphate transferase (Mnn4), putative
AFUA_1G12640	26.2461	92.6923	68.0842		0.283152	0.734518	zinc metalloproteinase, putative
AFUA_1G12650	309.473	254.881	149.861		1.21418	0.587964	3-ketoacyl-CoA ketothiolase (Kat1), putative
AFUA_1G12660	269.362	286.659	224.244		0.939661	0.782266	conserved hypothetical protein
AFUA_1G12670	4.82925	19.7772	59.7		0.244182	3.01862	conserved hypothetical protein
AFUA_1G12680	5.72374	5.54111	22.832		1.03296	4.12047	Rho GTPase activator Rga, putative
AFUA_1G12690	2.00495	1.95223	7.04743		1.027	3.60993	ABC multidrug transporter Mdr4
AFUA_1G12700	6.80586	3.87549	5.64313		1.75613	1.45611	conserved hypothetical protein
AFUA_1G12720	28.3159	13.9348	42.8189		2.03203	3.07281	PBSP domain protein
AFUA_1G12730	28.9919	27.4833	45.1726		1.05489	1.64364	60S ribosomal protein L3
AFUA_1G12740	188.102	146.867	313.471		1.28076	2.13438	conserved hypothetical protein
AFUA_1G12750	9.49565	9.51443	22.2938		0.998026	2.34316	PfkB family carbohydrate kinase (Mak32), putative
AFUA_1G12760	47.4149	18.7363	33.5042		2.53065	1.7882	adenylyl cyclase-associated protein (cap)
AFUA_1G12770	212.134	184.635	139.084		1.14894	0.753289	conserved hypothetical protein
AFUA_1G12780	135.879	117.429	99.7435		1.15711	0.849396	conserved hypothetical protein
AFUA_1G12790	14.9868	17.1807	34.1929		0.872304	1.99019	Exocyst complex component Sec5, putative
AFUA_1G12800	131.041	80.4435	133.226		1.62898	1.65614	isocitrate dehydrogenase, NAD-dependent
AFUA_1G12810	48.1874	30.2556	72.5619		1.59268	2.39829	conserved hypothetical protein
AFUA_1G12820	1.66339	3.56324	10.4767		0.466819	2.94022	gamma-tubulin complex component GCP6, putative
AFUA_1G12830	22.8656	4.33071	21.8172		5.27988	5.03779	nitrate reductase NiaD
AFUA_1G12840	15.946	5.53608	36.3179		2.88037	6.56023	nitrite reductase NiiA
AFUA_1G12850	18.5881	26.5458	106.018		0.700228	3.99379	nitrate transporter CrnA
AFUA_1G12870	29.1514	43.1307	99.3415		0.675885	2.30327	conserved hypothetical protein
AFUA_1G12875	54.8523	39.1674	68.5659		1.40046	1.75058	conserved hypothetical protein
AFUA_1G12880	8.76307	11.8559	43.2187		0.73913	3.64532	epoxide hydrolase, putative
AFUA_1G12890	190.389	153.887	446.418		1.2372	2.90094	60S ribosomal protein L5, putative
AFUA_1G12900	26.696	44.2493	59.6561		0.603309	1.34818	cell wall biogenesis protein Mhp1, putative
AFUA_1G12910	33.58	18.3505	40.0581		1.82993	2.18295	ABC fatty acid transporter, putative
AFUA_1G12920	77.4662	55.8071	103.583		1.38811	1.85609	glycogen phosphorylase GlpV/Gph1, putative
AFUA_1G12930	35.3365	64.0508	94.8987		0.551695	1.48162	G protein complex alpha subunit GpaB
AFUA_1G12940	444.874	394.366	440.215		1.12808	1.11626	MAP kinase SakA
AFUA_1G12950	23.4773	20.6058	53.8423		1.13935	2.61297	Avl9 protein, putative
AFUA_1G12960	72.4645	230.315	157.076		0.314632	0.682006	SCF ubiquitin ligase complex subunit CulA, putative
AFUA_1G12970	448.88	155.594	159.915		2.88494	1.02777	conserved hypothetical protein
AFUA_1G12980	141.708	59.419	58.3153		2.38489	0.981426	conserved hypothetical protein
AFUA_1G12990	156.625	67.9237	82.0883		2.3059	1.20854	conserved hypothetical protein
AFUA_1G13000	18.4306	9.6408	16.7676		1.91173	1.73924	conserved hypothetical protein
AFUA_1G13010	19.0054	12.124	30.1314		1.56759	2.48527	SNF2 family helicase/ATPase PasG, putative
AFUA_1G13020	6.8886	12.1901	41.962		0.565096	3.44229	cytoskeletal adaptor protein SagA
AFUA_1G13030	1.9826	0.193048	3.27948		10.27	16.9879	conserved hypothetical protein
AFUA_1G13040	4.06797	3.96101	9.42051		1.027	2.37831	possible dual specificity protein phosphatase 3
AFUA_1G13050	25.0807	157.762	141.47		0.158979	0.89673	C2H2 transcription factor, putative
AFUA_1G13060	18.4195	36.5704	65.7018		0.503673	1.79658	regulator of nonsense transcripts, putative
AFUA_1G13070	27.8988	41.5748	72.834		0.671052	1.75188	U3 small nucleolar ribonucleoprotein protein IMP4, putative
AFUA_1G13080	4.60214	2.46463	6.87847		1.86727	2.79087	BRCT domain protein
AFUA_1G13090	8.24518	6.28377	18.3203		1.31214	2.91549	anthranilate synthase multifunctional protein TrpC, putative
AFUA_1G13100	19.8381	18.2433	22.4234		1.08741	1.22913	nucleoporin (Nup184), putative
AFUA_1G13110	10.0548	6.18673	10.1207		1.62522	1.63587	4-coumarate-CoA ligase, putative
AFUA_1G13120	6.73885	42.4048	83.5322		0.158917	1.96987	conserved hypothetical protein
AFUA_1G13130	20.6244	44.9295	115.443		0.459038	2.56942	conserved hypothetical protein
AFUA_1G13140	16.1047	17.6164	29.9266		0.914187	1.69879	G-protein complex alpha subunit GpaA/FadA
AFUA_1G13160	39.0784	48.2182	76.5087		0.810449	1.58672	geranylgeranyl diphosphate synthase
AFUA_1G13170	4.91754	6.14492	17.1497		0.800261	2.79087	cell division control protein 14
AFUA_1G13180	2.45049	5.24934	9.66067		0.466819	1.84036	mitochondrial outer membrane protein (Sam35), putative
AFUA_1G13190	16.355	13.4301	39.678		1.21779	2.95442	copper-activated transcription factor GRISEA, putative
AFUA_1G13195	166.127	93.2044	124.749		1.7824	1.33844	DUF543 domain protein
AFUA_1G13200	5.1997	4.78611	11.5307		1.08641	2.40919	conserved hypothetical protein
AFUA_1G13210	21.3035	52.3876	89.7867		0.406651	1.71389	uridine permease Fui1, putative
AFUA_1G13220	11.3941	15.0007	18.3564		0.759569	1.22371	cytochrome P450 pisatin demethylase, putative
AFUA_1G13230	10.5595	7.83007	23.4011		1.34859	2.98861	conserved hypothetical protein
AFUA_1G13240	37.7987	29.4439	56.2714		1.28375	1.91114	adenosine deaminase, putative
AFUA_1G13250	50.9118	52.0365	49.4958		0.978387	0.951175	1-phosphatidylinositol-4,5-bisphosphate phosphodiesterase Plc1, putative
AFUA_1G13260	35.9405	33.6833	104.632		1.06701	3.10636	Coatomer subunit epsilon, putative
AFUA_1G13270	215.135	102.466	103.275		2.09957	1.0079	6-hexanolactone hydrolase, putative
AFUA_1G13280	86.6045	34.0405	53.0087		2.54416	1.55723	mannose-6-phosphate isomerase, class I
AFUA_1G13290	49.294	49.4806	61.5168		0.996228	1.24325	SAGA complex component (Sgf29), putative
AFUA_1G13300	208.889	81.3857	134.989		2.56665	1.65864	GTP cyclohydrolase II, putative
AFUA_1G13310	46.085	31.6654	49.8375		1.45538	1.57388	bZIP transcription factor, putative
AFUA_1G13320	14.157	9.64932	20.4902		1.46714	2.12349	6-phosphogluconate dehydrogenase family protein
AFUA_1G13330	44.2789	36.4047	78.0141		1.2163	2.14297	Arp2/3 complex subunit (Arp2), putative
AFUA_1G13340	18.9359	30.5697	68.1601		0.619432	2.22966	DUF6 domain protein, putative
AFUA_1G13350	145.018	95.3796	102.026		1.52043	1.06968	MFS transporter, putative
AFUA_1G13360	115.895	40.52	33.8712		2.86019	0.835913	C4-dicarboxylate transporter/malic acid transport protein, putative
AFUA_1G13370	495.91	199.509	168.519		2.48566	0.844668	aflatoxin B1-aldehyde reductase GliO-like, putative
AFUA_1G13380	308.634	97.3155	96.2939		3.17148	0.989502	hydantoin racemase (Dcg1), putative
AFUA_1G13390	5.85216	17.0949	33.8808		0.342334	1.98192	gamma tubulin MipA, putative
AFUA_1G13400	29.9094	96.1061	98.2609		0.311212	1.02242	conserved hypothetical protein
AFUA_1G13410	48.2087	87.1694	80.1721		0.553046	0.919728	conserved hypothetical protein
AFUA_1G13420	59.0725	92.1427	101.745		0.641098	1.10421	phosphotyrosyl phosphatase activator
AFUA_1G13430	88.8588	56.9035	98.8058		1.56157	1.73637	conserved hypothetical protein
AFUA_1G13440	6.61958	5.5571	10.5797		1.19119	1.90382	amine oxidase
AFUA_1G13450	30.8209	54.8304	54.9967		0.562112	1.00303	cell wall proline rich protein, putative
AFUA_1G13460	14.1946	9.39856	15.027		1.5103	1.59886	conserved hypothetical protein
AFUA_1G13470	224.037	155.351	246.236		1.44214	1.58503	prohibitin complex subunit Phb1, putative
AFUA_1G13480	482.343	443.261	558.264		1.08817	1.25945	ubiquinol-cytochrome C reductase complex subunit UcrQ, putative
AFUA_1G13490	249.2	90.5913	279.64		2.75081	3.08683	spermidine synthase
AFUA_1G13500	343.888	195.546	289.66		1.75861	1.48129	transketolase TktA
AFUA_1G13510	108.79	175.988	129.535		0.618165	0.736046	C6 transcription factor FacB/Cat8
AFUA_1G13520	85.7248	57.1548	89.2276		1.49987	1.56116	SET domain protein
AFUA_1G13530	1776.45	1224.61	694.166		1.45062	0.566845	conserved hypothetical protein
AFUA_1G13540	32.3819	27.8606	70.028		1.16228	2.51352	GTP-binding protein
AFUA_1G13550	3836.18	843.292	482.716		4.54906	0.572419	conserved hypothetical protein
AFUA_1G13560	2209	335.389	313.897		6.58636	0.935919	conserved hypothetical protein
AFUA_1G13570	45.6744	26.0644	49.3871		1.75237	1.89481	small nuclear ribonucleoprotein complex protein Nhp2, putative
AFUA_1G13580	14.7481	5.8571	20.8045		2.51799	3.55202	M protein repeat protein
AFUA_1G13590	98.6637	55.3368	66.9673		1.78297	1.21018	conserved hypothetical protein
AFUA_1G13600	26.4324	8.14432	27.0122		3.2455	3.31669	cell division protein kinase (Ctk1), putative
AFUA_1G13610	1.03823	0.556011	2.20394		1.86727	3.96385	SH3 domain protein
AFUA_1G13620	45.5591	29.2477	27.8501		1.5577	0.952217	oligopeptide transporter, OPT family, putative
AFUA_1G13630	53.3266	40.6255	30.0656		1.31264	0.740067	D-isomer specific 2-hydroxyacid dehydrogenase family protein
AFUA_1G13650	3.49902	7.49546	5.30551		0.466819	0.70783	hypothetical protein
AFUA_1G13660	44.8641	36.3859	63.3237		1.23301	1.74034	phenol 2-monooxygenase, putative
AFUA_1G13670	119.905	48.7827	68.4959		2.45794	1.4041	conserved hypothetical protein
AFUA_1G13680	11.6532	3.97139	15.4207		2.93429	3.88295	conserved hypothetical protein
AFUA_1G13690	28.3872	24.1039	51.9066		1.1777	2.15345	WD repeat protein
AFUA_1G13700	24.2369	10.5807	15.9889		2.29067	1.51113	centrin-binding protein Sfi1, putative
AFUA_1G13710	35.5356	28.9121	46.9395		1.22909	1.62353	isoleucyl-tRNA synthetase ,cytoplasmic
AFUA_1G13720	17.3611	16.2707	33.4597		1.06701	2.05643	intracellular protein transport protein (UsoA), putative
AFUA_1G13730	38.9441	51.7722	58.3556		0.75222	1.12716	5'->3' exoribonculease Dhp1
AFUA_1G13740	16.5408	14.3188	30.3028		1.15518	2.11629	pentafunctional polypeptide (AroM), putative
AFUA_1G13750	788.612	474.479	285.41		1.66206	0.601522	C2H2 transcription factor (Rpn4), putative
AFUA_1G13760	62.3763	87.3847	101.322		0.713813	1.15949	cell wall anchored protein, putative
AFUA_1G13780	229.769	84.9485	242.992		2.7048	2.86046	histone H4.1
AFUA_1G13790	3841.74	2704.64	2533.32		1.42043	0.936658	histone H3
AFUA_1G13800	507.941	48.2931	23.414		10.5179	0.484832	MFS multidrug transporter, putative
AFUA_1G13810	11.9311	4.25971	1.80909		2.80091	0.424698	hypothetical protein
AFUA_1G13820	121.809	97.7139	78.8247		1.24659	0.806689	hypothetical protein
AFUA_1G13840	14.3789	14.6112	22.4734		0.984104	1.53809	integral membrane protein, Mpv17/PMP22 family, putative
AFUA_1G13850	39.398	53.4236	53.853		0.737465	1.00804	conserved hypothetical protein
AFUA_1G13860	32.5223	15.691	37.5845		2.07267	2.3953	conserved hypothetical protein
AFUA_1G13870	10.1562	11.6991	26.8477		0.868119	2.29486	alpha-1,2-mannosyltransferase (Alg9), putative
AFUA_1G13880	36.823	65.734	83.0943		0.560182	1.2641	snoRNP assembly factor Naf1, putative
AFUA_1G13890	32.0181	30.1171	62.7396		1.06312	2.08319	U4/U6 small nuclear ribonucleoprotein, putative
AFUA_1G13900	12.3392	8.57898	16.4777		1.43831	1.92071	DNA-directed RNA polymerase I subunit (Rpa190), putative
AFUA_1G13910	32.2521	45.1607	46.9472		0.714163	1.03956	TFIIH complex helicase Rad3, putative
AFUA_1G13920	51.6481	124.31	80.0809		0.415478	0.644201	RING zinc finger protein, putative
AFUA_1G13930	55.9375	37.1204	61.1237		1.50692	1.64664	Leucine carboxyl methyltransferase superfamily
AFUA_1G13940	3.6055	1.37921	7.49755		2.61418	5.43613	SUN domain protein (Adg3), putative
AFUA_1G13950	4.21178	1.80446	3.44858		2.33409	1.91114	short-chain oxidoreductase, putative
AFUA_1G13960	34.9692	12.8751	37.4476		2.71604	2.90854	DUF292 domian protein
AFUA_1G13970	16.5248	4.70729	12.155		3.51048	2.58216	MFS transporter, putative
AFUA_1G13980	9.05219	6.6792	15.3728		1.35528	2.30159	conserved hypothetical protein
AFUA_1G13990	3.81711	8.17686	14.6625		0.466819	1.79317	conserved hypothetical protein
AFUA_1G14000	15.3096	17.6592	12.8568		0.866949	0.728053	hypothetical protein
AFUA_1G14010	83.9125	122.802	182.161		0.683314	1.48336	AP-2 adaptor complex subunit sigma, putative
AFUA_1G14020	40.7159	64.9606	156.657		0.626778	2.41157	diphthine synthase, putative
AFUA_1G14030	35.7549	38.6543	91.5061		0.924993	2.3673	SAGA-like transcriptional regulatory complex subunit Spt3, putative
AFUA_1G14040	612.356	121.134	163.666		5.05519	1.35111	blue light-inducible protein Bli-3
AFUA_1G14050	47.2991	52.2953	72.8756		0.904461	1.39354	F-box domain protein
AFUA_1G14060	79.2046	406.968	247.416		0.194621	0.607949	C2H2 finger domain protein, putative
AFUA_1G14070	7.79881	5.66821	11.9097		1.37589	2.10114	chromosome segregation protein BIR1, putative
AFUA_1G14080	6.33653	5.81737	15.6473		1.08924	2.68975	integral membrane protein Pth11-like, putative
AFUA_1G14090	65.7159	33.4881	72.9551		1.96237	2.17854	histidinol-phosphate aminotransferase
AFUA_1G14100	62.8872	45.4094	87.6408		1.3849	1.93002	conserved hypothetical protein
AFUA_1G14110	45.8399	40.0339	79.5579		1.14503	1.98727	RNA polymerase subunit
AFUA_1G14120	17.3285	7.62747	24.1873		2.27185	3.17108	nuclear segregation protein (Bfr1), putative
AFUA_1G14130	1.34777	1.44357	3.98502		0.933637	2.76054	conserved hypothetical protein
AFUA_1G14140	4.92779	1.21801	4.13829		4.04576	3.39758	DUF409 domain protein
AFUA_1G14150	103.824	115.608	216.033		0.89807	1.86867	conserved hypothetical protein
AFUA_1G14160	42.0691	15.0198	19.7745		2.80091	1.31656	hypothetical protein
AFUA_1G14170	11.3607	6.97138	32.9449		1.62962	4.72573	beta-galactosidase, putative
AFUA_1G14180	44.7832	32.9585	63.2383		1.35878	1.91872	methyltransferase (Ncl1), putative
AFUA_1G14190	7.58121	1.80446	16.0934		4.20137	8.91865	DUF614 domain protein
AFUA_1G14200	229.963	194.07	261.172		1.18495	1.34576	mitochondrial processing peptidase beta subunit, putative
AFUA_1G14210	35.4104	15.7358	30.8444		2.25031	1.96014	nucleoside-diphosphate-sugar epimerase, putative
AFUA_1G14220	63.5562	57.2816	118.816		1.10954	2.07425	fibrillarin
AFUA_1G14240	4.77556	7.50201	19.551		0.636571	2.6061	Golgi membrane protein (Coy1), putative
AFUA_1G14250	6.93139	6.12486	16.5532		1.13168	2.70262	potassium channel, putative
AFUA_1G14260	12.3272	9.08392	19.5588		1.35703	2.15312	TGF beta receptor associated protein 1, putative
AFUA_1G14270	65.4281	33.8583	69.8912		1.93241	2.06423	catechol dioxygenase, putative
AFUA_1G14280	39.3151	42.9079	94.4201		0.916267	2.20053	C6 finger domain protein, putative
AFUA_1G14290	49.4182	44.2695	62.1255		1.11631	1.40335	small nuclear ribonucleoprotein (LSM7), putative
AFUA_1G14300	1137.55	351.307	339.671		3.23804	0.966879	Fasciclin domain family protein
AFUA_1G14310	83.1173	104.326	169.431		0.796704	1.62404	poly(A)-binding protein-dependent poly(A) ribonuclease, putative
AFUA_1G14320	81.0232	29.7684	53.1416		2.72179	1.78517	UBX domain protein
AFUA_1G14330	16.7617	4.59668	7.21945		3.64647	1.57058	ABC transporter, putative
AFUA_1G14340	10.9384	5.02111	15.638		2.17849	3.11445	metalloreductase, putative
AFUA_1G14350	17.7845	12.2106	34.4339		1.45647	2.81999	2-deoxy-D-gluconate 3-dehydrogenase, putative
AFUA_1G14360	6.72973	13.7129	13.4397		0.490758	0.980072	#N/A
AFUA_1G14380	16.4553	18.6321	20.9588		0.88317	1.12488	3-ketoacyl-acyl carrier protein reductase, putative
AFUA_1G14390	1.51246	2.26795	12.6591		0.666884	5.58174	zinc-dependent alcohol dehydrogenase, putative
AFUA_1G14400	37.906	26.6803	48.2801		1.42075	1.80958	hydroxyisocaproate dehydrogenase, putative
AFUA_1G14410	411.174	289.158	705.703		1.42197	2.44054	60S ribosomal protein L17
AFUA_1G14420	20.1586	26.0587	35.7308		0.773585	1.37117	conserved hypothetical protein
AFUA_1G14430	7.91989	3.12525	10.2391		2.53416	3.27624	chitin binding protein, putative
AFUA_1G14440	30.9103	13.7947	30.4647		2.24073	2.20843	cation diffusion facilitator 1
AFUA_1G14450	6.39764	0.411143	3.72505		15.5606	9.06022	exo-beta-1,3-glucanase Exg0
AFUA_1G14460	27.3197	4.87692	15.7413		5.60182	3.2277	fungal specific transcription factor, putative
AFUA_1G14480	1.73906	1.86267	8.70179		0.933637	4.67168	hypothetical protein
AFUA_1G14490	48.0313	67.4312	26.1691		0.712301	0.388086	aminotransferase, putative
AFUA_1G14500	30.3248	15.4213	34.7756		1.96642	2.25503	conserved hypothetical protein
AFUA_1G14510	54.0718	26.5097	33.4715		2.0397	1.26261	ankyrin repeat protein
AFUA_1G14520	154.845	60.6775	105.302		2.55194	1.73543	pyridine nucleotide-disulphide oxidoreductase, putative
AFUA_1G14530	33.7875	5.39465	15.274		6.26315	2.83132	general amidase, putative
AFUA_1G14540	36.5157	22.9273	34.7483		1.59268	1.51559	oxidoreductase, short-chain dehydrogenase/reductase family
AFUA_1G14550	117.275	45.5648	79.4971		2.57381	1.7447	Mn superoxide dismutase MnSOD
AFUA_1G14560	3.92872	3.94498	9.60576		0.99588	2.43493	mannosidase MsdS
AFUA_1G14570	20.0081	5.80404	18.2028		3.44728	3.13623	phosphoribosyl-AMP cyclohydrolase, putative
AFUA_1G14580	31.6612	25.9842	56.8606		1.21848	2.18827	U3 small nucleolar RNA-associated protein Utp11, putative
AFUA_1G14590	36.634	34.0062	71.1009		1.07727	2.09082	conserved hypothetical protein
AFUA_1G14600	41.8819	26.6614	35.9461		1.57088	1.34825	transcription initiation factor TFIID, 31kD subunit, putative
AFUA_1G14610	51.4651	74.6284	82.982		0.689619	1.11194	lipin Smp2, putative
AFUA_1G14620	40.6222	129.435	117.271		0.313842	0.906022	Fibronectin type III domain protein
AFUA_1G14630	17.5608	10.7977	21.3017		1.62634	1.97279	tRNAHis guanylyltransferase Thg1, putative
AFUA_1G14640	52.4081	43.458	68.4429		1.20595	1.57492	conserved hypothetical protein
AFUA_1G14650	7.38682	4.99697	13.4406		1.47826	2.68975	WD repeat protein
AFUA_1G14660	7.45958	1.04215	7.08157		7.15789	6.79516	regulator of secondary metabolism LaeA
AFUA_1G14670	17.0134	25.3093	60.7666		0.672219	2.40096	WD repeat protein
AFUA_1G14680	27.5019	165.982	101.405		0.165692	0.610942	DNA-dependent RNA polymerase II largest subunit, putative
AFUA_1G14690	51.762	42.9517	63.7805		1.20512	1.48494	ubiquitin-protein ligase Sel1/Ubx2, putative
AFUA_1G14695	47.3363	28.0666	46.9103		1.68657	1.67139	DNA repair protein Dds20/Mei5, putative
AFUA_1G14700	14.6314	12.3855	17.8199		1.18134	1.43877	MFS allantoate transporter, putative
AFUA_1G14710	43.357	21.4746	38.9889		2.01899	1.81558	beta-glucosidase, putative
AFUA_1G14720	104.223	67.9038	74.1054		1.53487	1.09133	Kelch motif domain protein
AFUA_1G14730	37.5637	59.7219	100.387		0.628977	1.68091	cell division cycle protein Cdc20, putative
AFUA_1G14740	92.5949	391.086	224.079		0.236763	0.572965	transcription factor TFIIA complex subunit Toa1, putative
AFUA_1G14750	140.765	156.562	174.96		0.899101	1.11752	C2H2 transcription factor (Sfp1), putative
AFUA_1G14770	16.3512	16.6199	35.2163		0.983833	2.11892	tRNA dihydrouridine synthase, putative
AFUA_1G14780	436.791	228.125	272.001		1.91471	1.19233	BAP31 domain protein, putative
AFUA_1G14790	132.602	63.4842	42.8878		2.08874	0.675566	mitochondrial inheritance component mdm12
AFUA_1G14800	41.5409	15.1278	40.0602		2.74599	2.64812	conserved hypothetical protein
AFUA_1G14810	6.1931	6.9764	13.5029		0.887721	1.93551	serine/threonine protein kinase (Kin4), putative
AFUA_1G14820	4.28115	18.3418	14.2812		0.233409	0.778613	hypothetical protein
AFUA_1G14830	167.785	96.9871	111.896		1.72998	1.15372	conserved hypothetical protein
AFUA_1G14840	15.1069	16.6566	30.3172		0.906962	1.82013	Ser/Thr protein phosphatase superfamily
AFUA_1G14850	33.5096	20.1704	50.1382		1.66133	2.48573	acyl-CoA dehydrogenase, putative
AFUA_1G14860	6.49093	5.64875	23.9901		1.14909	4.24698	bZIP transcription factor, putative
AFUA_1G14870	33.8285	14.4932	20.8838		2.33409	1.44094	GPI anchor biosynthesis protein Gwt1, putative
AFUA_1G14880	145.133	52.5081	57.469		2.76401	1.09448	N-acylethanolamine amidohydrolase, putative
AFUA_1G14890	47.9179	34.9597	37.908		1.37066	1.08433	cAMP-specific phosphodiesterase, putative
AFUA_1G14910	157.832	252.17	222.447		0.625897	0.882131	endosomal SPRY domain protein, putative
AFUA_1G14920	50.7071	23.6947	37.0864		2.14002	1.56518	peptidase D, putative
AFUA_1G14930	1649.67	924	311.641		1.78536	0.337274	conserved hypothetical protein
AFUA_1G14940	37.363	36.4822	105.137		1.02414	2.88188	protein translocation complex componenet (Npl1), putative
AFUA_1G14945	15.1174	10.4091	22.2674		1.45232	2.13922	C6 transcription factor, putative
AFUA_1G14950	15.2138	14.974	27.3081		1.01602	1.8237	sugar 1,4-lactone oxidase, putative
AFUA_1G14960	11.4042	6.74194	19.8072		1.69153	2.93791	gelsolin repeat protein, putative
AFUA_1G14970	18.6614	15.7048	23.0411		1.18827	1.46714	ADP-ribosylation factor family protein
AFUA_1G14980	7.76316	11.0173	10.7706		0.704632	0.977606	conserved hypothetical protein
AFUA_1G14990	5.69275	10.475	24.1691		0.543461	2.30731	ATP-dependent RNA helicase (Drs1), putative
AFUA_1G15000	65.7352	58.3032	91.5051		1.12747	1.56947	2-isopropylmalate synthase
AFUA_1G15010	102.733	136.899	97.1973		0.750431	0.709994	AMP binding domain protein, putative
AFUA_1G15020	733.547	849.528	1669.11		0.863476	1.96475	40S ribosomal protein S5, putative
AFUA_1G15030	25.6096	16.3097	36.8373		1.57021	2.25862	SDA1 domain protein
AFUA_1G15040	10.8222	10.1426	22.5632		1.06701	2.22461	conserved hypothetical protein
AFUA_1G15050	5.22632	5.72799	14.7066		0.912418	2.56749	Hsp70 family chaperone Lhs1/Orp150, putative
AFUA_1G15070	78.6288	49.0414	118.206		1.60331	2.41033	mtDNA inheritance protein Dml1, putative
AFUA_1G15080	6.84754	3.35281	7.11965		2.04233	2.12349	conserved hypothetical protein
AFUA_1G15090	39.0763	34.0062	54.4366		1.14909	1.60078	conserved hypothetical protein
AFUA_1G15100	1.75161	1.87612	3.58553		0.933637	1.91114	EBP domain protein, putative
AFUA_1G15110	11.9601	9.475	14.8084		1.26228	1.56289	conserved hypothetical protein
AFUA_1G15120	1.37556	2.27697	13.4246		0.604118	5.8958	dsDNA-dependent ATPase (Rad54b), putative
AFUA_1G15130	14.8964	28.0031	49.2308		0.531956	1.75805	GPI anchor transamidase, putative
AFUA_1G15140	17.5959	9.6238	31.6758		1.82837	3.29141	mitochondrial phosphate carrier protein (Mir1), putative
AFUA_1G15150	16.1136	16.3001	19.3426		0.988557	1.18666	alpha-amylase, putative
AFUA_1G15160	44.3405	47.4922	45.4401		0.933637	0.95679	conserved hypothetical protein
AFUA_1G15170	84.9386	22.4324	42.8715		3.78642	1.91114	acyl-CoA thioesterase II
AFUA_1G15180	8.76051	2.88714	11.6485		3.03432	4.03463	conserved hypothetical protein
AFUA_1G15190	5.0844	8.55769	12.5553		0.594133	1.46714	hypothetical protein
AFUA_1G15200	12.3809	17.2034	36.6834		0.719679	2.13234	Hsp70 family protein
AFUA_1G15210	37.9265	16.459	59.1929		2.3043	3.59638	conserved hypothetical protein
AFUA_1G15220	105.748	43.3071	94.7917		2.44182	2.18883	conserved hypothetical protein
AFUA_1G15230	8.02489	21.6535	31.1688		0.370604	1.43943	C6 transcription factor, putative
AFUA_1G15240	55.3758	71.5508	109.555		0.773936	1.53115	prefoldin subunit 4, putative
AFUA_1G15250	45.7596	41.2325	57.8205		1.1098	1.4023	autophagy protein Atg27, putative
AFUA_1G15260	97.9725	417.08	1191.55		0.234901	2.85687	conserved hypothetical protein
AFUA_1G15270	365.235	330.791	212.305		1.10412	0.64181	heat shock protein Hsp98/Hsp104/ClpA, putative
AFUA_1G15280	16.1732	25.5401	70.3628		0.63325	2.755	polysaccharide deacetylase family protein
AFUA_1G15300	12.3195	15.2251	54.0996		0.809152	3.5533	choline transport protein, putative
AFUA_1G15310	6.48057	3.4706	12.6888		1.86727	3.65609	DNA replication initiation factor Cdc45
AFUA_1G15330	5.78814	4.85183	6.41064		1.19298	1.32128	conserved hypothetical protein
AFUA_1G15340	123.387	376.57	400.391		0.32766	1.06326	poly(A) polymerase Pap
AFUA_1G15350	151.804	664.981	264.786		0.228282	0.398185	homoserine acetyltransferase family protein
AFUA_1G15360	27.4202	53.7605	49.8921		0.510043	0.928043	conserved hypothetical protein
AFUA_1G15370	15.7712	20.8669	38.1915		0.755802	1.83025	C6 transcription factor, putative
AFUA_1G15380	4.31978	2.59102	5.18761		1.66721	2.00215	conserved hypothetical protein
AFUA_1G15390	79.9596	220.808	192.997		0.362123	0.874048	DUF1014 domain protein
AFUA_1G15400	46.2093	15.6488	30.9116		2.9529	1.97534	peroxisome biosynthesis protein (Peroxine-7), putative
AFUA_1G15410	13.2594	13.9389	21.8922		0.951253	1.57058	CUE domain protein, putative
AFUA_1G15420	26.6859	51.5354	49.2917		0.517816	0.956462	LysM domain protein
AFUA_1G15430	2.93171	7.45771	35.3401		0.39311	4.73873	lipase/esterase, putative
AFUA_1G15440	8.54575	14.2682	32.9737		0.598937	2.311	alpha-1,3-glucan synthase Ags3
AFUA_1G15450	87.6209	52.8856	65.1741		1.6568	1.23236	adenylosuccinate synthetase AdB
AFUA_1G15460	13.6907	10.8512	28.1491		1.26167	2.5941	DnaJ domain protein
AFUA_1G15470	10.6931	10.7373	29.59		0.99588	2.75582	C6 transcription factor (UaY), putative
AFUA_1G15490	4.82783	4.74008	18.3009		1.01851	3.86089	MFS multidrug transporter, putative
AFUA_1G15500	18.2274	19.9879	30.2044		0.911925	1.51113	GTP-binding protein Obg
AFUA_1G15510	116.846	27.0291	56.9136		4.32298	2.10564	JmjC domain protein, putative
AFUA_1G15520	20.9602	16.6708	22.9394		1.2573	1.37602	urea amidolyase, putative
AFUA_1G15530	23.8778	42.9661	45.1845		0.555737	1.05163	lactam utilization protein LamB
AFUA_1G15540	6.00492	19.724	28.7723		0.304447	1.45874	hypothetical protein
AFUA_1G15550	32.0308	31.9209	46.1183		1.00344	1.44477	homeobox and C2H2 transcription factor, putative
AFUA_1G15560	20.6467	29.025	71.613		0.711343	2.46729	hypothetical protein
AFUA_1G15570	21.4801	22.5558	37.168		0.95231	1.64783	ubiquitin-conjugating enzyme, putative
AFUA_1G15580	65.315	36.6445	59.8259		1.7824	1.6326	acetylserotonin methytransferase-like protein (ASMTL), putative
AFUA_1G15590	343.327	228.692	384.627		1.50126	1.68186	succinate dehydrogenase subunit CybS, putative
AFUA_1G15610	2092.33	412.735	407.832		5.06941	0.98812	oxidoreductase, zinc-binding dehydrogenase family, putative
AFUA_1G15620	57.3213	42.3828	42.3923		1.35247	1.00022	DEAD box RNA helicase HelA, putative
AFUA_1G15630	66.8701	39.9758	100.451		1.67277	2.5128	hypothetical protein
AFUA_1G15640	591.334	445.444	350.77		1.32752	0.78746	conserved hypothetical protein
AFUA_1G15650	2.71313	0.726493	1.5427		3.73455	2.12349	conserved hypothetical protein
AFUA_1G15660	1.86614	0.499697	5.51773		3.73455	11.0421	conserved hypothetical protein
AFUA_1G15670	2.43818	0.870494	3.51212		2.80091	4.03463	laccase TilA
AFUA_1G15680	2.29299	1.96478	4.3808		1.16705	2.22966	C6 finger domain protein, putative
AFUA_1G15690	1.56012	0.417753	2.12903		3.73455	5.09637	conserved hypothetical protein
AFUA_1G15700	9.54953	9.35781	12.9394		1.02049	1.38274	conserved hypothetical protein
AFUA_1G15710	13.5143	7.76703	21.741		1.73996	2.79914	anaphase-promoting complex component Cut20/Apc4, putative
AFUA_1G15720	25.7049	69.6485	89.6235		0.369066	1.2868	importin beta-1 subunit
AFUA_1G15730	326.86	163.641	360.548		1.99742	2.20328	40S ribosomal protein S22
AFUA_1G15740	19.3769	5.39609	21.8594		3.59091	4.05096	phosphoglycerate mutase family protein
AFUA_1G15750	18.4685	10.2569	19.4987		1.80059	1.90103	conserved fungal protein
AFUA_1G15760	57.0041	33.8411	60.303		1.68446	1.78195	phosphatidylserine decarboxylase, putative
AFUA_1G15770	19.9944	8.85178	17.7052		2.2588	2.00019	anaphase promoting complex subunit 10 (APC10), putative
AFUA_1G15780	95.5191	30.0907	77.2782		3.17437	2.56817	3-isopropylmalate dehydrogenase Leu2A
AFUA_1G15790	81.498	37.5554	94.8359		2.17008	2.52523	CDP-diacylglycerol-inositol 3-phosphatidyltransferase PIS
AFUA_1G15800	48.1836	53.5588	63.5877		0.899639	1.18725	protein phosphatase 2C, putative
AFUA_1G15810	109.961	534.121	547.491		0.205873	1.02503	RNA splicing factor (Pad-1), putative
AFUA_1G15820	43.4223	68.2466	83.3026		0.636257	1.22061	fatty acid hydroxylase, putative
AFUA_1G15830	3.481	10.8985	29.7202		0.319402	2.72701	conserved hypothetical protein
AFUA_1G15840	14.5269	20.7459	37.2254		0.700228	1.79435	conserved hypothetical protein
AFUA_1G15850	39.1557	62.1052	43.3536		0.630474	0.698066	C6 transcription factor, putative
AFUA_1G15860	28.4808	29.8468	63.5657		0.954232	2.12973	Coatomer subunit delta, putative
AFUA_1G15870	205.449	958.282	623.209		0.214393	0.650339	conserved glutamic acid-rich protein
AFUA_1G15880	40.5387	47.83	73.1855		0.847557	1.53012	DUF803 domain membrane protein
AFUA_1G15890	80.6938	41.5526	41.883		1.94197	1.00795	SacI domain protein
AFUA_1G15900	27.0272	33.6576	53.5302		0.803005	1.59043	importin beta-2 subunit, putative
AFUA_1G15910	0.848247	10.2211	33.3765		0.08299	3.26545	C6 transcription factor RosA-like, putative
AFUA_1G15920	50.1269	66.3951	87.0304		0.754978	1.3108	26S proteasome-associated ubiquitin C-terminal hydrolase, putative
AFUA_1G15930	45.855	31.5073	61.8678		1.45538	1.9636	choline kinase, putative
AFUA_1G15940	459.144	769.463	617.441		0.596706	0.802431	Auxin Efflux Carrier superfamily
AFUA_1G15950	217.305	507.82	316.786		0.427917	0.623816	MAP kinase kinase (Pbs2), putative
AFUA_1G15960	422.881	128.273	230.741		3.29672	1.79883	glutathione oxidoreductase Glr1, putative
AFUA_1G15970	8.47989	2.36938	17.4421		3.57894	7.36143	aldo-keto reductase (AKR13), putative
AFUA_1G15990	28.239	22.341	17.5166		1.264	0.784057	hypothetical protein
AFUA_1G16000	59.1704	263.011	198.84		0.224973	0.756013	serine/threonine protein kinase, putative
AFUA_1G16010	21.9899	26.2122	13.5523		0.838921	0.517023	hypothetical protein
AFUA_1G16020	46.3391	106.565	42.9845		0.434845	0.403366	conserved hypothetical protein
AFUA_1G16030	6.57152	5.86552	10.9607		1.12036	1.86867	conserved hypothetical protein
AFUA_1G16040	4.0811	1.94275	3.71286		2.10068	1.91114	ferric-chelate reductase, putative
AFUA_1G16050	54.4379	63.63	162.347		0.855538	2.55142	conserved serine-proline rich protein
AFUA_1G16060	102.517	216.675	268.411		0.473139	1.23877	conserved hypothetical protein
AFUA_1G16070	30.8864	30.5556	31.4715		1.01083	1.02998	conserved hypothetical protein
AFUA_1G16080	5.05414	18.9468	41.8428		0.266754	2.20843	hypothetical protein
AFUA_1G16090	3.56763	2.86591	13.7943		1.24485	4.81324	arsenate reductase (ArsC), putative
AFUA_1G16100	1.26683	2.37454	3.16945		0.533507	1.33476	arsenite efflux transporter (ArsB), putative
AFUA_1G16110	68.7681	125.318	105.575		0.54875	0.842462	arsenic methyltransferase Cyt19, putative
AFUA_1G16115	37.773	72.3684	76.9578		0.521955	1.06342	hypothetical protein
AFUA_1G16120	140.318	114.53	155.342		1.22517	1.35635	arsenic resistance protein ArsH, putative
AFUA_1G16130	15.0676	35.6442	42.4061		0.422722	1.18971	copper-transporting ATPase, putative
AFUA_1G16150	25.2051	106.299	121.82		0.237114	1.14601	thioredoxin domain protein
AFUA_1G16160	42.9445	155.744	214.54		0.275737	1.37752	C6 transcription factor, putative
AFUA_1G16170	25.6623	39.1522	54.295		0.655452	1.38677	conserved hypothetical protein
AFUA_1G16190	5.81992	18.7008	43.473		0.311212	2.32466	extracellular cell wall glucanase Crf1/allergen Asp F9
AFUA_1G16200	2.88808	1.12486	4.29953		2.5675	3.82228	conserved hypothetical protein
AFUA_1G16210	19.2359	11.6347	34.177		1.65332	2.93749	threonyl-tRNA synthetase
AFUA_1G16220	21.0071	51.1701	81.0705		0.410536	1.58433	C6 transcription factor, putative
AFUA_1G16230	14.2435	11.3189	21.9455		1.25838	1.93884	MFS quinate transporter, putative
AFUA_1G16240	10.1083	9.41458	32.7865		1.07368	3.48252	TIM barrel metal-dependent hydrolase, putative
AFUA_1G16250	2.61302	2.65145	6.25593		0.985506	2.35943	alpha-glucosidase, putative
AFUA_1G16270	0.62687	1.00714	6.27338		0.622425	6.2289	xylitol dehydrogenase XdhB
AFUA_1G16280	112.063	114.753	217.348		0.976563	1.89405	mitochondrial F1F0-ATP synthase g subunit, putative
AFUA_1G16290	12.4578	9.1296	15.9567		1.36455	1.74779	ATP dependent RNA helicase (Rok1), putative
AFUA_1G16300	158.122	360.183	371.954		0.439005	1.03268	conserved hypothetical protein
AFUA_1G16310	176.851	784.423	1221.58		0.225453	1.55729	glucose-inducible SAM-dependent methyltransferase Rrg1, putative
AFUA_1G16320	48.0246	56.2108	116.21		0.854366	2.0674	vacuolar protein sorting-associated protein Vps28, putative
AFUA_1G16330	30.7476	17.2899	32.0294		1.77836	1.85249	ribosome assembly protein Noc2, putative
AFUA_1G16340	35.3872	28.848	59.7381		1.22668	2.07079	potassium transporter, putative
AFUA_1G16350	122.444	92.5382	33.3146		1.32317	0.360009	hypothetical protein
AFUA_1G16360	48.5197	38.2121	10.3863		1.26975	0.271807	hypothetical protein
AFUA_1G16370	27.464	20.101	46.224		1.3663	2.29958	molybdenum cofactor biosynthesis protein (MoaC), putative
AFUA_1G16380	21.4543	30.639	53.0502		0.700228	1.73146	molybdopterin cofactor biosynthetic protein
AFUA_1G16390	8.46274	3.02142	8.55461		2.80091	2.83132	MFS hexose transporter, putative
AFUA_1G16400	7.06362	4.17418	5.09669		1.69222	1.22101	beta-glucosidase, putative
AFUA_1G16410	2.68701	2.878	5.23835		0.933637	1.82013	C6 transcription factor, putative
AFUA_1G16420	0.925949	0.247941	4.212		3.73455	16.9879	GPI anchored protein, putative
AFUA_1G16430	7.08678	94.7931	57.8761		0.0747605	0.610552	hypothetical protein
AFUA_1G16440	3.04093	4.16182	10.7588		0.730673	2.58512	ABC ATPase, putative
AFUA_1G16450	16198.2	24632.5	7113.53		0.657596	0.288786	conserved hypothetical protein
AFUA_1G16460	8.55793	8.16989	29.9582		1.0475	3.6669	bZIP transcription factor (LziP), putative
AFUA_1G16470	8.85642	16.5704	29.6795		0.534474	1.79112	tRNA processing endoribonuclease Trz1, putative
AFUA_1G16480	108.582	52.3876	59.9237		2.07267	1.14385	acid phosphatase, putative
AFUA_1G16490	107.006	70.7533	88.5648		1.51238	1.25174	short chain dehydrogenase/reductase, putative
AFUA_1G16500	46.9113	31.942	51.2143		1.46864	1.60335	small monomeric GTPase (Gtr2), putative
AFUA_1G16510	41.7588	30.8829	90.0023		1.35216	2.91431	heme/steroid binding domain protein, putative
AFUA_1G16523	765.218	525.214	996.713		1.45697	1.89773	40S ribosomal protein S25, putative
AFUA_1G16540	1.01083	1.08268	5.74763		0.933637	5.30872	WD40 domain protein
AFUA_1G16550	6.93778	17.4986	35.0203		0.396476	2.00132	dihydrouridine synthase family protein, putative
AFUA_1G16553	16.7695	8.38202	26.9529		2.00065	3.21557	conserved hypothetical protein
AFUA_1G16556	1.20696	1.93912	4.39222		0.622425	2.26505	phosphatase, putative
AFUA_1G16560	3.84608	2.85193	4.03736		1.34859	1.41566	MIF domain protein
AFUA_1G16564	14.1778	13.4983	28.6635		1.05034	2.12349	DUF455 domain protein
AFUA_1G16570	33.9349	27.0669	49.2654		1.25374	1.82013	MIND kinetochore complex component Mtw1, putative
AFUA_1G16580	10.8645	8.89871	15.1171		1.22091	1.69879	conserved hypothetical protein
AFUA_1G16590	20.4533	29.818	26.361		0.685938	0.884065	C2H2 type conidiation transcription factor BrlA
AFUA_1G16600	10.6079	8.39795	19.3016		1.26316	2.29836	ribonuclease T2, putative
AFUA_1G16610	48.5197	65.6824	102.998		0.738702	1.56811	Swr1p complex component (Swc5), putative
AFUA_1G16620	8.66424	8.24897	24.5232		1.05034	2.97288	C6 transcription factor, putative
AFUA_1G16630	37.0128	10.2053	25.0048		3.62682	2.45018	short chain dehydrogenase family protein
AFUA_1G16635	34.6569	19.7202	58.1332		1.75744	2.9479	DSBA family oxidoreductase, putative
AFUA_1G16640	10.7172	5.73949	15.9549		1.86727	2.77984	conserved hypothetical protein
AFUA_1G16650	46.9098	33.2979	67.9299		1.40879	2.04007	conserved hypothetical protein
AFUA_1G16660	9.71221	5.53327	18.9877		1.75524	3.43156	eukaryotic translation initiation factor subunit eIF2B-gamma, putative
AFUA_1G16680	3.65647	3.57581	17.5005		1.02256	4.89414	conserved hypothetical protein
AFUA_1G16690	4.28956	3.82872	10.6235		1.12036	2.77469	MFS transporter, putative
AFUA_1G16700	6.80518	4.85926	12.8168		1.40046	2.6376	beta galactosidase, putative
AFUA_1G16710	268.007	95.3702	85.0273		2.81018	0.891549	fatty acid elongase (Gig30), putative
AFUA_1G16720	68.7473	38.941	78.7817		1.76542	2.02311	conserved hypothetical protein
AFUA_1G16730	6.31421	3.91543	13.4542		1.61265	3.43619	pseudouridine synthase TruD/Pus7, putative
AFUA_1G16745	8.44093	3.01364	14.5054		2.80091	4.81324	PHD finger domain protein
AFUA_1G16750	17.2259	38.8226	81.6232		0.443709	2.10246	mitochondrial cation transporter, putative
AFUA_1G16760	8.83248	10.7217	26.2494		0.823798	2.44826	acetyltransferase, GNAT family family
AFUA_1G16770	10.7875	3.59466	11.1227		3.00098	3.09423	amidase family protein, putative
AFUA_1G16780	30.8264	75.4129	67.0424		0.408769	0.889005	protein kinase (Lkh1), putative
AFUA_1G16790	28.3529	91.7897	107.057		0.30889	1.16633	conserved hypothetical protein
AFUA_1G16800	41.6836	40.6283	69.019		1.02598	1.69879	cleavage and polyadenylation specifity factor, 73 kDa subunit, putative
AFUA_1G16810	4.84178	5.18593	11.5919		0.933637	2.23525	aminotransferase, class III
AFUA_1G16820	19.7464	31.725	50.0445		0.622425	1.57745	signal recognition particle 19 kDa protein, putative
AFUA_1G16830	26.7973	33.6551	45.199		0.796234	1.34301	C6 transcription factor, putative
AFUA_1G16840	162.406	892.126	621.664		0.182044	0.696834	TCTP family protein
AFUA_1G16850	19.8851	173.735	89.4208		0.114456	0.514695	sphinganine hydroxylase Sur2, putative
AFUA_1G16860	23.8134	1.06275	5.64185		22.4073	5.30872	conserved hypothetical protein
AFUA_1G16870	84.8563	54.9886	63.8895		1.54316	1.16187	hypothetical protein
AFUA_1G16880	12.88	8.43961	15.5089		1.52614	1.83763	ABC multidrug transporter, putative
AFUA_1G16890	1.94079	0.692913	6.17985		2.80091	8.91865	transesterase (LovD), putative
AFUA_1G16910	8.84924	3.46765	3.33813		2.55194	0.962648	MFS multidrug transporter, putative
AFUA_1G16920	20.6499	2.45753	8.62797		8.40274	3.51083	beta-xylosidase XylA
AFUA_1G16930	151.712	39.3133	88.7289		3.85903	2.25697	phosphatidylserine decarboxylase, putative
AFUA_1G16940	7.36005	6.5188	18.1563		1.12905	2.78523	DEAD/DEAH box helicase, putative
AFUA_1G16950	14.3872	19.3952	50.7766		0.741794	2.618	phosphatidylinositol:UDP-GlcNAc transferase subunit PIG-A
AFUA_1G16960	2413.68	215.908	310.272		11.1792	1.43706	conserved hypothetical protein
AFUA_1G16970	388.643	123.165	115.652		3.15546	0.938994	ADP-ribosylation factor family protein
AFUA_1G16980	197.029	94.3167	122.772		2.08901	1.3017	conserved hypothetical protein
AFUA_1G16990	17.2356	9.40449	27.2188		1.8327	2.89424	mRNA splicing factor (Prp18), putative
AFUA_1G17000	42.8381	46.8489	107.073		0.914387	2.28549	Sin3-associated polypeptide Sap18, putative
AFUA_1G17010	75.8706	30.5992	49.4252		2.4795	1.61524	glutathione S-transferase, putative
AFUA_1G17020	26.6405	38.4502	51.2237		0.692857	1.33221	UDP-glucose dehydrogenase
AFUA_1G17030	37.5571	37.7804	38.324		0.994089	1.01439	glycosyl transferase, putative
AFUA_1G17040	259.33	152.321	104.647		1.70252	0.687011	D-lactate dehydrogenase, putative
AFUA_1G17050	13.41	11.0988	14.4182		1.20824	1.29908	hypothetical protein
AFUA_1G17060	912.633	1490.56	596.065		0.612276	0.399893	HLH DNA binding domain protein, putative
AFUA_1G17070	352.235	583.396	541.869		0.603766	0.928818	FYVE domain protein, putative
AFUA_1G17080	22.5035	33.5091	94.8749		0.671564	2.83132	acetyltransferase, GNAT family, putative
AFUA_1G17090	12.3465	18.5602	30.7416		0.665217	1.65632	NOL1/NOP2/sun domain protein, putative
AFUA_1G17100	25.2434	30.1979	52.7912		0.835931	1.74817	conserved hypothetical protein
AFUA_1G17110	30.2444	18.6094	41.2732		1.62522	2.21787	long chain fatty alcohol oxidase, putative
AFUA_1G17120	50.4956	83.4788	58.423		0.604892	0.699854	translation elongation factor eEF-1B gamma subunit, putative
AFUA_1G17130	10.9686	22.8053	18.1968		0.480965	0.797917	F-box domain protein
AFUA_1G17140	24.0537	25.3954	30.324		0.947168	1.19408	voltage-gated K+ channel beta subunit (KCNAB), putative
AFUA_1G17150	6.69633	3.07385	11.6621		2.17849	3.79397	C6 transcription factor, putative
AFUA_1G17160	1.08691	0.465668	3.95536		2.33409	8.49396	MFS transporter, putative
AFUA_1G17170	0.693139	5.19685	15.4496		0.133377	2.97288	TfdA family taurine dioxygenase, putative
AFUA_1G17180	0.576244	2.46881	3.40762		0.233409	1.38027	pyridine nucleotide-disulphide oxidoreductase AMID-like, putative
AFUA_1G17190	1.23147	0.219833	1.86725		5.60182	8.49396	long-chain-fatty-acid-CoA ligase, putative
AFUA_1G17200	3.43732	1.79992	4.00742		1.90971	2.22645	nonribosomal siderophore peptide synthase SidC
AFUA_1G17220	4.80076	1.3712	3.2029		3.50114	2.33584	extracellular polygalacturonase, putative
AFUA_1G17230	11.0439	9.06886	15.9085		1.21779	1.75419	conserved hypothetical protein
AFUA_1G17240	6.41795	2.97879	10.3153		2.15455	3.46292	C6 transcription factor, putative
AFUA_1G17250	1.72056	0.921427	6.26125		1.86727	6.79516	conidial hydrophobin RodB
AFUA_1G17260	4.01653	1.29061	6.57742		3.11212	5.09637	hypothetical protein
AFUA_1G17270	0.815184	0.698501	1.92824		1.16705	2.76054	FRE family ferric-chelate reductase, putative
AFUA_1G17280	3.07087	1.64457	4.47006		1.86727	2.71807	conserved hypothetical protein
AFUA_1G17290	4.13814	1.66211	5.88244		2.4897	3.53915	conserved hypothetical protein
AFUA_1G17310	4.22646	18.7865	30.7608		0.224973	1.63739	MFS lactose permease, putative
AFUA_1G17320	1.05173	6.00792	3.18944		0.175057	0.530872	endo-arabinanase, putative
AFUA_1G17350	150.677	160.778	94.4911		0.937174	0.587713	CP2 transcription factor, putative
AFUA_1G17360	329.241	392.48	286.076		0.838874	0.728893	bZIP transcription factor (BACH2), putative
AFUA_1G17370	31299.7	5298.25	3182.79		5.90755	0.600724	heat shock protein Awh11, putative
AFUA_1G17380	382.357	95.0873	139.542		4.02111	1.46752	3-oxoacyl-(acyl-carrier-protein) reductase, putative
AFUA_1G17400	57.5658	54.8512	69.7155		1.04949	1.27099	peptidase S41 family protein
AFUA_1G17410	19.6914	48.4252	39.4123		0.406636	0.813881	beta-glucosidase, putative
AFUA_1G17420	167.907	79.3608	54.9055		2.11574	0.691846	hypothetical protein
AFUA_1G17430	852.044	835.539	511.351		1.01975	0.612001	tyrosinase
AFUA_1G17440	2.17053	6.34853	5.69621		0.341895	0.897249	ABC drug exporter AbcA
AFUA_1G17460	20.8988	41.7686	52.9231		0.500347	1.26705	C6 transcription factor, putative
AFUA_1G17470	7.82576	4.19101	20.914		1.86727	4.9902	high affinity nitrate transporter NrtB
AFUA_1G17480	2.08687	5.02921	7.59429		0.41495	1.51004	MFS transporter, putative
AFUA_1G17490	4.60864	1.18469	2.8511		3.89016	2.40662	glucokinase regulator family protein, putative
AFUA_1G17520	4.00815	9.4899	30.5154		0.42236	3.21557	D-lactate dehydrogenase (cytochrome), putative
AFUA_1G17530	6.05236	4.3217	21.1073		1.40046	4.88402	MFS transporter, putative
AFUA_1G17550	6.26357	0.981773	2.9187		6.37986	2.97288	HET domain protein
AFUA_1G17580	2.61421	3.64003	18.3131		0.718183	5.03104	xenobiotic compound monooxygenase, DszA family, putative
AFUA_1G17590	1.32713	1.13717	13.2812		1.16705	11.6792	phosphoesterase superfamily protein
AFUA_1G17640	3.21786	47.8026	42.1307		0.0673155	0.881348	C6 transcription factor RegA
AFUA_1G17650	3.67574	24.1845	31.5299		0.151987	1.30372	short chain dehydrogenase, putative
AFUA_1G17660	1.3847	13.6447	23.9353		0.101482	1.75419	histidinol dehydrogenase, putative
AFUA_1G17670	58.9364	12.1113	30.0825		4.86623	2.48384	salicylate hydroxylase, putative
AFUA_1G17680	3.56108	6.19808	13.5665		0.574546	2.18883	MFS transporter, putative
AFUA_1G17690	11.8341	12.3872	38.1714		0.95535	3.08153	FAD binding oxidoreductase, putative
AFUA_1G17700	7.6409	2.5575	15.2063		2.98764	5.94577	short chain dehydrogenase, putative
AFUA_1G17723	1.0338	2.58366	1.25403		0.40013	0.485369	aldose 1-epimerase family protein, putative
AFUA_1G17740	1.214	1.89626	9.34194		0.640208	4.92649	polyketide synthase, putative
AFUA_1G17750	43.7642	27.313	70.2256		1.60232	2.57114	nicotinamide N-methyltransferase, putative
AFUA_2G00100	16.3726	44.222	13.9886		0.370236	0.316327	C6 transcription factor Aro80, putative
AFUA_2G00110	5.5017	5.05093	1.43008		1.08924	0.283132	MFS transporter, putative
AFUA_2G00120	9.49299	3.76583	4.47815		2.52082	1.18915	carboxyvinyl-carboxyphosphonate phosphorylmutase
AFUA_2G00130	39.2131	8.40008	9.98899		4.66819	1.18915	solid-state culture specific protein, putative
AFUA_2G00140	33.0324	1.35335	2.79171		24.4079	2.06282	FAD monooxygenase, putative
AFUA_2G00150	96.173	4.17604	2.36474		23.0297	0.566264	catecholamine-O-methyltransferase, putative
AFUA_2G00170	11.6581	1.78382	2.52528		6.53546	1.41566	glutathione-dependent formaldehyde dehydrogenase
AFUA_2G00180	27.8088	74.8891	29.6367		0.371333	0.395741	neutral amino acid permease
AFUA_2G00200	1359.44	144.86	7.69021		9.38451	0.0530872	catalase, putative
AFUA_2G00210	576.395	488.082	142.078		1.18094	0.291094	conserved hypothetical protein
AFUA_2G00220	130.079	273.453	213.772		0.47569	0.781751	aminopeptidase, putative
AFUA_2G00230	1.75373	3.75676	5.05238		0.466819	1.34488	Amid-like NADH oxidoreductase, putative
AFUA_2G00240	1.99505	3.41898	4.71911		0.583523	1.38027	conserved hypothetical protein
AFUA_2G00260	5.90856	4.46721	8.85366		1.32265	1.98192	phenylacetaldoxime dehydratase family protein, putative
AFUA_2G00270	19.6623	47.5397	41.1692		0.413598	0.865996	#N/A
AFUA_2G00300	27.8209	39.334	34.4225		0.707301	0.875135	hypothetical protein
AFUA_2G00310	60.5453	130.145	85.2826		0.465215	0.65529	amino acid transporter, putative
AFUA_2G00320	1.80505	5.80006	15.1081		0.311212	2.60481	sterol delta 5,6-desaturase, putative
AFUA_2G00330	0.794537	2.83671	4.09613		0.280091	1.44397	beta-alanine synthase, putative
AFUA_2G00340	3.37664	3.33845	7.79807		1.01144	2.33584	diaminopropionate ammonia-lyase, putative
AFUA_2G00350	2.65619	4.26749	7.24957		0.622425	1.69879	acetylornithine deacetylase (ArgE), putative
AFUA_2G00360	51.8687	68.2415	67.8104		0.760077	0.993684	homeobox and C2H2 transcription factor, putative
AFUA_2G00370	73.4217	52.6263	42.2878		1.39515	0.803547	conserved hypothetical protein
AFUA_2G00380	1.20896	0.431632	1.46651		2.80091	3.39758	GNAT family acetyltransferase, putative
AFUA_2G00420	2.06174	3.31244	7.19024		0.622425	2.17068	RTA1 domain protein
AFUA_2G00430	7.59628	7.36134	12.8345		1.03192	1.7435	exo-beta-1,3-glucanase, putative
AFUA_2G00440	2410.09	3350.18	1279.35		0.719393	0.381876	conserved hypothetical protein
AFUA_2G00450	1.59905	7.82953	29.511		0.204233	3.76919	hexokinase, putative
AFUA_2G00460	67.3314	17.6164	87.9095		3.82208	4.9902	short-chain dehydrogenase/reductase family protein, putative
AFUA_2G00470	83.8648	74.5959	81.3139		1.12426	1.09006	C6 transcription factor, putative
AFUA_2G00480	43.3737	20.8661	28.7591		2.07866	1.37826	aryl-alcohol dehydrogenase (AAD), putative
AFUA_2G00520	6.73885	0.424579	1.80318		15.8718	4.24698	conserved hypothetical protein
AFUA_2G00530	1.82131	0.390154	1.32558		4.66819	3.39758	DUF1275 domain protein
AFUA_2G00540	1.11284	0.397313	1.68738		2.80091	4.24698	carboxyphosphonoenolpyruvate phosphonomutase, putative
AFUA_2G00550	0.808662	2.59842	2.20709		0.311212	0.849396	conserved hypothetical protein
AFUA_2G00560	2.35533	0.630686	1.87496		3.73455	2.97288	hypothetical protein
AFUA_2G00570	2.86534	5.62651	15.6408		0.509257	2.77984	GNAT family acetyltransferase, putative
AFUA_2G00590	113.145	39.8498	63.9871		2.83928	1.60571	glutathione S-transferase, putative
AFUA_2G00600	4.87635	0.652871	0.554545		7.4691	0.849396	conserved hypothetical protein
AFUA_2G00620	5.29949	0.630686	0.803552		8.40274	1.27409	GDSL-like lipase/acylhydrolase domain protein
AFUA_2G00625	20.9723	1.21422	13.4076		17.2723	11.0421	conserved hypothetical protein
AFUA_2G00630	5.16901	2.58366	1.88104		2.00065	0.728053	GDSL lipase/acylhydrolase family protein
AFUA_2G00640	1.29732	0.347383	0.442598		3.73455	1.27409	beta-N-hexosaminidase, putative
AFUA_2G00650	7.28298	1.61393	4.79802		4.51258	2.97288	arabinosidase, putative
AFUA_2G00660	20.1244	25.9369	77.4594		0.7759	2.98646	sensor histidine kinase/response regulator TcsB/Sln1, putative
AFUA_2G00670	3.31419	9.22938	34.9757		0.359091	3.78961	protein kinase, putative
AFUA_2G00680	14.1946	7.94731	27.0016		1.78609	3.39758	glycosyl hydrolase, putative
AFUA_2G00690	7.8691	9.45629	10.1275		0.832155	1.07098	glucan 1,4-alpha-glucosidase, putative
AFUA_2G00710	0.768934	0.205897	3.49777		3.73455	16.9879	alpha-amylase, putative
AFUA_2G00720	3.44461	1.58119	5.14839		2.17849	3.25602	aldehyde dehydrogenase, putative
AFUA_2G00730	8.88303	2.62467	13.0976		3.38444	4.9902	FAD binding domain protein
AFUA_2G00740	2.51212	2.30629	7.83582		1.08924	3.39758	conserved hypothetical protein
AFUA_2G00750	5.98188	2.49164	17.8381		2.40078	7.15919	oxidoreductase, 2OG-Fe(II) oxygenase family, putative
AFUA_2G00760	4.52047	2.01741	9.59605		2.24073	4.75662	pectate lyase A
AFUA_2G00770	7.94059	20.5293	17.6866		0.386793	0.86153	salicylate hydroxylase
AFUA_2G00780	76.5648	68.7999	41.7417		1.11286	0.606711	MFS multidrug transporter, putative
AFUA_2G00790	262.345	97.6927	75.2806		2.68541	0.770586	conserved hypothetical protein
AFUA_2G00800	11.2018	22.282	20.0909		0.502728	0.901666	pectate lyase, putative
AFUA_2G00810	3.9032	3.53746	6.82887		1.10339	1.93044	purine nucleoside permease, putative
AFUA_2G00820	19.7592	4.11515	9.23782		4.80156	2.24483	extracellular GDSL-like lipase/acylhydrolase, putative
AFUA_2G00830	27.891	9.86387	25.3744		2.82759	2.57246	short chain dehydrogenase/reductase
AFUA_2G00840	18.5154	4.06798	8.63832		4.55148	2.12349	MFS transporter, putative
AFUA_2G00850	4.39093	2.93939	2.99605		1.49382	1.01927	conserved hypothetical protein
AFUA_2G00860	60.6497	11.0571	7.04391		5.48512	0.637047	hypothetical protein
AFUA_2G00870	0.281437	0.301441	1.02417		0.933637	3.39758	conserved hypothetical protein
AFUA_2G00880	0.396403	1.69832	2.34413		0.233409	1.38027	C6 finger domain protein, putative
AFUA_2G00890	1.98851	7.4545	62.4136		0.266754	8.37261	conserved hypothetical protein
AFUA_2G00900	0.760497	2.03638	6.2269		0.373455	3.05782	PTH11-like integral membrane protein, putative
AFUA_2G00910	1.25194	1.63891	5.06213		0.763885	3.08871	Pfs, NB-ARC and TPR domain protein
AFUA_2G00920	0.91662	1.96355	5.55942		0.466819	2.83132	extracellular glycosyl hydrolase/cellulase, putative
AFUA_2G00930	1.65516	2.27932	7.95929		0.726162	3.49196	xylosidase/glycosyl hydrolase, putative
AFUA_2G00940	39.4588	80.9492	80.724		0.487452	0.997219	hypothetical protein
AFUA_2G00960	8.47235	4.20529	13.7238		2.01469	3.26347	NACHT domain protein
AFUA_2G00963	3.01365	3.22786	10.2815		0.933637	3.18523	hypothetical protein
AFUA_2G00967	60.3418	10.552	34.7309		5.71853	3.29141	Cupin domain protein
AFUA_2G00970	143.106	64.9606	79.976		2.20296	1.23115	alcohol dehydrogenase, zinc-containing, putative
AFUA_2G00980	0.606497	3.89764	17.105		0.155606	4.38854	conserved hypothetical protein
AFUA_2G00990	3.9003	2.08877	12.4193		1.86727	5.94577	glycerophosphoryl diester phosphodiesterase family protein
AFUA_2G01000	5.8986	2.26795	11.9711		2.60085	5.27839	LIM domain protein
AFUA_2G01010	635.064	148.863	317.656		4.2661	2.13388	myo-inositol-phosphate synthase, putative
AFUA_2G01030	42.5066	25.5401	63.1945		1.66431	2.47433	1-aminocyclopropane-1-carboxylate deaminase, putative
AFUA_2G01040	656.932	404.123	633.958		1.62557	1.56872	formaldehyde dehydrogenase
AFUA_2G01050	227.936	168.469	304.384		1.35298	1.80677	mitochondrial intermembrane space translocase subunit Tim9, putative
AFUA_2G01060	24.5355	27.0177	41.8846		0.908128	1.55026	Rho GTPase activator (Sac7), putative
AFUA_2G01070	91.5851	17.0031	86.6542		5.38637	5.09637	GPI-anchor biosynthesis protein (Pig-F), putative
AFUA_2G01080	111.246	33.007	53.0895		3.37036	1.60843	conserved hypothetical protein
AFUA_2G01090	9.6243	15.1071	22.4936		0.63707	1.48894	DNA helicase, putative
AFUA_2G01100	238.387	177.288	282.783		1.34463	1.59505	pirin domain protein, putative
AFUA_2G01110	3.45161	1.58441	6.95323		2.17849	4.38854	conserved hypothetical protein
AFUA_2G01120	1.96096	5.10083	10.959		0.384439	2.14847	DNA repair protein Ntg1, putative
AFUA_2G01130	28.6707	43.3071	67.5503		0.662034	1.5598	ubiquitin conjugating enzyme (UbcJ), putative
AFUA_2G01140	13.9125	15.8327	37.9714		0.878718	2.39829	GPI anchored cell wall protein (Dan4), putative
AFUA_2G01150	8.01033	16.5466	29.1503		0.484108	1.76171	conserved hypothetical protein
AFUA_2G01160	11.341	24.8224	23.7756		0.456886	0.957829	C-4 methylsterol oxidase, putative
AFUA_2G01170	3.21323	4.01523	16.809		0.800261	4.18631	1,3-beta-glucanosyltransferase Gel1
AFUA_2G01180	5.90983	1.74072	3.6292		3.39505	2.08488	cellobiose dehydrogenase, putative
AFUA_2G01190	19.6702	9.02928	18.7475		2.17849	2.0763	Cu-dependent DNA-binding protein, putative
AFUA_2G01200	27.5532	46.7996	61.1103		0.588749	1.30579	actin polymerization protein Bzz1, putative
AFUA_2G01210	59.4119	65.2258	104.499		0.910866	1.60211	ATP dependent RNA helicase (Dbp5), putative
AFUA_2G01220	72.0215	61.7706	116.759		1.16595	1.8902	GTP cyclohydrolase II, putative
AFUA_2G01230	21.1908	150.662	314.112		0.140652	2.08488	dihydrodipicolinate synthetase family protein
AFUA_2G01240	20.0203	10.8478	20.1424		1.84556	1.85682	beta-fructofuranosidase, putative
AFUA_2G01250	42.6623	91.6365	48.6735		0.46556	0.531158	serine peptidase, putative
AFUA_2G01260	10.6704	11.9543	24.7712		0.892598	2.07215	HLH transcription factor, putative
AFUA_2G01270	111.393	21.437	26.1172		5.19631	1.21832	ferric-chelate reductase, putative
AFUA_2G01280	2.76466	2.59102	10.0608		1.06701	3.88295	D-mandelate dehydrogenase, putative
AFUA_2G01290	6.73885	5.97339	8.75226		1.12815	1.46521	polyketide synthase, putative
AFUA_2G01300	11.7386	6.98501	31.4451		1.68055	4.5018	conserved hypothetical protein
AFUA_2G01310	15.3367	9.45787	23.2548		1.62158	2.45878	EF-hand calcium-binding domain protein, putative
AFUA_2G01320	7.41274	26.3451	44.5505		0.28137	1.69103	potassium/sodium P-type ATPase, putative
AFUA_2G01330	32.9934	32.2205	53.4116		1.02399	1.65769	exosome complex subunit Rrp46, putative
AFUA_2G01340	3.46569	7.42407	4.72948		0.466819	0.637047	hypothetical protein
AFUA_2G01350	44.4273	26.6556	62.892		1.66672	2.35943	NAD+ kinase Utr1, putative
AFUA_2G01360	66.3103	31.1811	93.1883		2.12662	2.98861	GAF domain nucleotide-binding protein
AFUA_2G01370	1.84837	5.69179	23.3321		0.324743	4.09926	GABA permease, putative
AFUA_2G01380	2.66592	2.85541	6.66978		0.933637	2.33584	GNAT family N-acetyltransferase, putative
AFUA_2G01390	2.88808	7.42407	28.3769		0.389016	3.82228	S-adenosylmethionine-dependent methyltransferase, putative
AFUA_2G01400	7.2962	5.37268	14.5203		1.35802	2.70262	short chain dehydrogenase/oxidoreductase, putative
AFUA_2G01405	16.2454	37.1204	6.89716		0.437643	0.185805	cyanovirin-N family protein
AFUA_2G01410	66.9862	195.076	62.9185		0.343386	0.322534	aldo-keto reductase, putative
AFUA_2G01430	14.9675	8.68368	25.2482		1.72364	2.90755	conserved hypothetical protein
AFUA_2G01440	15.724	17.2426	39.8502		0.911925	2.31115	mitochondrial carrier protein, putative
AFUA_2G01450	75.2787	75.0801	93.7182		1.00265	1.24824	alpha-1,6 mannosyltransferase subunit (Mnn9), putative
AFUA_2G01460	10.2027	10.928	26.4713		0.933637	2.42235	ZIP Zinc transporter, putaitve
AFUA_2G01470	4.43778	6.33762	16.1494		0.700228	2.54819	hypothetical protein
AFUA_2G01480	50.1237	51.539	87.098		0.972539	1.68994	60S ribosomal subunit biogenesis protein Nop16, putative
AFUA_2G01490	4.66536	2.49849	3.81996		1.86727	1.52891	hypothetical protein
AFUA_2G01500	24.2765	9.26101	17.0183		2.62137	1.83763	ABC bile acid transporter, putative
AFUA_2G01510	11.5141	38.7182	34.3488		0.297381	0.887146	integral peroxisomal membrane peroxin, putative
AFUA_2G01520	2.95177	2.66758	8.14022		1.10653	3.05153	protein kinase, putative
AFUA_2G01530	14.6836	38.2926	55.4677		0.383458	1.44852	COPII-coated vesicle protein (Erv41), putative
AFUA_2G01540	10.1385	6.98084	25.8592		1.45232	3.70431	conserved hypothetical protein
AFUA_2G01550	65.3428	107.494	157.978		0.607872	1.46964	mitogen-activated protein kinase MAF1
AFUA_2G01570	55.3581	88.9394	154.793		0.622425	1.74043	AP-1 adaptor complex subunit sigma, putative
AFUA_2G01580	68.3847	160.801	71.4905		0.425275	0.44459	FAD monooxygenase, putative
AFUA_2G01590	7740.41	3656.99	4021.67		2.11661	1.09972	non-classical export protein Nce102, putative
AFUA_2G01600	1.25536	1.51267	2.85523		0.8299	1.88755	sphingomyelin phosphodiesterase, putative
AFUA_2G01610	2.45545	1.05199	11.6163		2.33409	11.0421	conserved hypothetical protein
AFUA_2G01620	37.545	41.9814	46.9194		0.894326	1.11763	conserved hypothetical protein
AFUA_2G01630	56.8729	337.89	177.052		0.168318	0.523993	MSF1 domain protein
AFUA_2G01640	45.6691	53.2771	70.6586		0.857199	1.32625	tryptophanyl-tRNA synthetase
AFUA_2G01650	19.7864	10.1357	18.3924		1.95215	1.81462	conserved hypothetical protein
AFUA_2G01660	95.1556	59.9161	89.0181		1.58815	1.48571	mitochondrial outer membrane translocase receptor (TOM70), putative
AFUA_2G01670	101.724	75.4439	118.27		1.34834	1.56765	FHA domain protein
AFUA_2G01680	7.04319	2.79401	16.6125		2.52082	5.94577	monooxygenase, putative
AFUA_2G01690	3.0533	2.08112	11.3637		1.46714	5.4604	conserved hypothetical protein
AFUA_2G01700	141.312	105.868	117.304		1.3348	1.10802	carbon catabolite derepressing protein kinase Snf1, putative
AFUA_2G01710	8.59341	9.91225	9.3215		0.866949	0.940402	GPI anchored protein, putative
AFUA_2G01720	8.01033	18.3851	37.9994		0.435697	2.06686	conserved hypothetical protein
AFUA_2G01730	257.475	468.207	344.077		0.549917	0.734883	conserved hypothetical protein
AFUA_2G01740	31.2941	21.6535	23.4314		1.44522	1.08211	sulfate transporter, putative
AFUA_2G01750	250.818	301.46	416.039		0.832011	1.38008	methionine aminopeptidase, type II, putative
AFUA_2G01760	3.43691	1.8406	1.5634		1.86727	0.849396	NACHT domain protein
AFUA_2G01770	2.02166	0.649606	2.39101		3.11212	3.68071	GMC oxidoreductase
AFUA_2G01780	15.8605	9.33136	12.3971		1.6997	1.32854	small nucleolar ribonucleoprotein complex subunit Utp15, putative
AFUA_2G01790	21.0048	43.2078	37.7129		0.486135	0.872827	conserved serine proline-rich protein
AFUA_2G01800	12.2087	5.06187	10.0322		2.4119	1.98192	hypothetical pathogenicity factor
AFUA_2G01810	289.478	150.006	214.312		1.92978	1.42869	conserved hypothetical protein
AFUA_2G01820	27.0691	14.9449	37.4054		1.81126	2.50289	pre-mRNA splicing factor (Prp24), putative
AFUA_2G01830	83.3719	63.6797	113.463		1.30924	1.78178	conserved hypothetical protein
AFUA_2G01840	96.5832	25.6584	62.9609		3.76419	2.45381	conserved hypothetical protein
AFUA_2G01850	35.8986	16.5943	69.1005		2.16331	4.16411	phytanoyl-CoA dioxygenase family protein
AFUA_2G01860	31.3705	24.0802	48.0423		1.30275	1.99509	integral membrane protein
AFUA_2G01870	15.5845	4.03396	10.1611		3.86333	2.5189	chitin synthase A
AFUA_2G01880	12.3655	18.9206	35.6242		0.653546	1.88283	low molecular weight phosphotyrosine protein phosphatase, putative
AFUA_2G01890	39.963	34.2428	70.5756		1.16705	2.06103	ubiquinone biosynthesis protein Coq7, putative
AFUA_2G01900	47.2828	110.689	84.9439		0.427166	0.767408	RNA polymerase II transcription elongation factor Rtf1p, putative
AFUA_2G01910	9.81722	5.45973	6.9562		1.79812	1.27409	conserved hypothetical protein
AFUA_2G01920	57.64	46.8889	40.491		1.22929	0.863552	glutaminyl-tRNA synthetase
AFUA_2G01940	18.7895	17.0681	34.4046		1.10086	2.01573	conserved hypothetical protein
AFUA_2G01950	10.6307	5.83916	7.93561		1.82059	1.35903	monooxygenase, putative
AFUA_2G01960	7.27796	3.71204	11.3508		1.96064	3.05782	UbiA prenyltransferase family protein
AFUA_2G01970	6.69593	9.3786	50.3741		0.713958	5.37118	conserved hypothetical protein
AFUA_2G01980	14.1112	18.7783	39.2919		0.751464	2.09241	nuclear protein (Sgd1), putative
AFUA_2G01990	71.9132	85.3768	137.155		0.842303	1.60647	signal recognition particle 14kD protein, putative
AFUA_2G02000	63.5698	38.2546	37.3979		1.66176	0.977606	conserved hypothetical protein
AFUA_2G02010	76.3492	64.0756	59.838		1.19155	0.933866	transmembrane protein UsgS
AFUA_2G02020	141.908	76.313	81.6945		1.85956	1.07052	formamidase FmdS
AFUA_2G02030	34.5404	5.53476	17.0728		6.24063	3.08465	fructosyl amine:oxygen oxidoreductase
AFUA_2G02040	8.4204	3.65632	12.8367		2.30297	3.51083	MFS transporter, putative
AFUA_2G02050	56.1571	38.1515	191.807		1.47195	5.0275	peptidyl-prolyl cis-trans isomerase Cpr7, putative
AFUA_2G02060	202.166	375.328	344.44		0.538637	0.917704	aminoacyl-tRNA hydrolase, putative
AFUA_2G02070	22.8535	43.9347	72.8589		0.520169	1.65834	CCR4-NOT transcription complex, subunit 3
AFUA_2G02080	42.7771	56.4875	86.3644		0.757284	1.52891	C2H2 finger domain protein, putative
AFUA_2G02090	4.01653	8.60406	40.9262		0.466819	4.75662	methylated-DNA-protein-cysteine methyltransferase
AFUA_2G02100	115.636	70.5215	107.134		1.63972	1.51917	dihydrolipoamide dehydrogenase
AFUA_2G02110	11.6967	9.28009	18.3267		1.26041	1.97484	MFS monosaccharide transporter, putative
AFUA_2G02120	22.9391	13.0294	29.723		1.76057	2.28123	phosphoglucomutase, putative
AFUA_2G02130	32.1465	13.543	44.6487		2.37365	3.29681	fatty acid desaturase, putative
AFUA_2G02140	18.7541	54.7328	35.8457		0.342648	0.654921	CUE domain protein, putative
AFUA_2G02150	331.759	153.24	370.678		2.16496	2.41893	40S ribosomal protein S10a
AFUA_2G02160	20.4821	11.2127	29.8144		1.82668	2.65898	CCCH zinc finger domain protein
AFUA_2G02165	39.3874	16.0535	32.0282		2.45351	1.99509	conserved hypothetical protein
AFUA_2G02170	1.51414	4.2346	6.27536		0.357563	1.48192	nuclear condensin complex subunit Smc4, putative
AFUA_2G02180	24.4659	70.6154	50.3741		0.346467	0.71336	conserved hypothetical protein
AFUA_2G02190	5.8578	4.74389	13.7781		1.23481	2.90438	#N/A
AFUA_2G02210	12.3693	13.2485	34.8488		0.933637	2.63039	conserved hypothetical protein
AFUA_2G02220	31.0499	26.4045	35.8536		1.17593	1.35786	UDP-glucose:sterol glycosyltransferase
AFUA_2G02230	41.7809	43.3071	102.384		0.964759	2.36415	prefoldin subunit 3, putative
AFUA_2G02240	29.2659	31.3461	55.7028		0.933637	1.77702	conserved hypothetical protein
AFUA_2G02250	45.0404	25.78	46.3966		1.7471	1.79971	allantoinase Dal1, putative
AFUA_2G02260	8.39765	2.33192	11.3184		3.60117	4.85369	conserved hypothetical protein
AFUA_2G02270	246.855	189.184	293.311		1.30484	1.5504	40S ribosomal protein S14, putative
AFUA_2G02275	665.055	398.724	711.596		1.66796	1.78469	mitochondrial F1F0 ATP synthase subunit Atp18, putative
AFUA_2G02280	1.41871	5.31841	17.4244		0.266754	3.27624	mitotic spindle biogenesis protein Spc19, putative
AFUA_2G02290	11.5523	22.6344	29.6073		0.510388	1.30807	37S ribosomal protein Rsm22
AFUA_2G02300	97.822	75.4381	88.9956		1.29672	1.17972	hypothetical protein
AFUA_2G02310	3448.94	832.037	727.42		4.14518	0.874264	actin cortical patch protein Sur7, putative
AFUA_2G02320	90.9214	37.998	77.6927		2.3928	2.04465	Hsp70 chaperone (BiP), putative
AFUA_2G02330	17.3285	4.12448	10.51		4.20137	2.54819	hypothetical protein
AFUA_2G02340	48.0786	24.0945	38.1225		1.99542	1.58221	exosome complex exonuclease Rrp40, putative
AFUA_2G02350	196.95	48.0625	46.1183		4.09778	0.959548	MYB DNA-binding domain protein
AFUA_2G02360	15.733	7.24695	12.4594		2.17099	1.71926	UDP-glucose:glycoprotein glucosyltransferase, putative
AFUA_2G02370	4.36812	4.31871	10.6992		1.01144	2.4774	conserved hypothetical protein
AFUA_2G02380	133.376	112.388	296.151		1.18675	2.63508	conserved hypothetical protein
AFUA_2G02390	675.134	454.407	704.116		1.48575	1.54952	conserved hypothetical protein
AFUA_2G02400	88.5837	93.263	171.256		0.949828	1.83627	conserved hypothetical protein
AFUA_2G02410	47.5684	30.5697	60.5868		1.55606	1.98192	hypothetical protein
AFUA_2G02420	25.8292	44.9997	68.7113		0.573987	1.52693	cytoplasm to vacuole targeting Vps64, putative
AFUA_2G02430	82.35	98.9309	126.553		0.8324	1.27921	mitochondrial genome maintenance protein Mgr2, putative
AFUA_2G02450	10.7365	9.54224	23.2763		1.12515	2.43929	Leucine Rich Repeat domain protein
AFUA_2G02460	0.322605	2.24598	4.25569		0.143637	1.89481	conserved hypothetical protein
AFUA_2G02470	119.179	134.01	93.1197		0.889329	0.694873	PA and RING finger domain protein
AFUA_2G02480	377.172	287.298	245.279		1.31283	0.853744	conserved hypothetical protein
AFUA_2G02490	37.3583	29.1458	16.784		1.28177	0.575861	conserved hypothetical protein
AFUA_2G02500	21.4058	10.986	14.6057		1.94846	1.32949	conserved hypothetical protein
AFUA_2G02510	3.9701	2.89518	6.91637		1.37128	2.38892	TORC1 growth control complex subunit Kog1, putative
AFUA_2G02520	20.4191	15.7086	18.2818		1.29987	1.16381	cell polarity protein (Tea1), putative
AFUA_2G02530	228.068	571.112	379.056		0.39934	0.663716	casein kinase I, putative
AFUA_2G02540	147.321	86.1854	189.387		1.70935	2.19744	bZIP transcription factor (Fcr3), putative
AFUA_2G02550	106.455	66.7777	166.303		1.59417	2.4904	Phosducin family protein
AFUA_2G02560	78.0443	27.9111	54.2747		2.79617	1.94456	Coatomer subunit gamma, putative
AFUA_2G02570	74.5719	22.282	37.2701		3.34673	1.67266	F-box domain protein
AFUA_2G02580	62.1584	10.342	17.2944		6.01029	1.67225	HAD superfamily hydrolase, putative
AFUA_2G02590	40.3604	22.4324	53.9864		1.7992	2.40662	aspartyl-tRNA synthetase Dps1, putative
AFUA_2G02600	22.2795	17.0871	43.5412		1.30387	2.54819	conserved hypothetical protein
AFUA_2G02610	110.875	69.0207	96.2728		1.60641	1.39484	SNARE complex subunit (Vam7), putative
AFUA_2G02620	35.2537	31.4961	42.561		1.1193	1.35131	Ku family DNA helicase, putative
AFUA_2G02630	174.909	74.8207	106.906		2.33771	1.42883	conserved hypothetical protein
AFUA_2G02640	22.4527	1.75966	5.23125		12.7597	2.97288	hypothetical protein
AFUA_2G02650	5.29788	5.67445	9.33846		0.933637	1.6457	conserved hypothetical protein
AFUA_2G02660	1.73285	3.50581	6.13081		0.494279	1.74876	DNA topoisomerase III, putative
AFUA_2G02670	49.5032	134.135	170.006		0.369056	1.26742	DUF1295 domain protein
AFUA_2G02680	46.4114	103.673	106.244		0.447671	1.0248	mitochondrial inner membrane AAA protease Yta12, putative
AFUA_2G02690	70.9546	96.7248	92.0337		0.733572	0.951501	fungal specific transcription factor, putative
AFUA_2G02700	133.887	263.519	266.517		0.508072	1.01137	mitochondrial DnaJ chaperone (Tim14), putative
AFUA_2G02710	80.2244	83.1771	200.857		0.964501	2.41481	60S ribosomal protein L24b
AFUA_2G02720	4.16478	0.836403	6.86756		4.9794	8.21082	conserved hypothetical protein
AFUA_2G02730	13.3379	61.9956	43.7297		0.215143	0.705368	C2H2 finger domain protein, putative
AFUA_2G02740	66.3103	201.811	306.05		0.328576	1.51652	hypothetical protein
AFUA_2G02750	38.843	29.9257	76.8762		1.29798	2.5689	S-adenosylmethionine-dependent methyltransferase, putative
AFUA_2G02760	11.7084	10.8686	12.2143		1.07727	1.12382	protein-tyrosine phosphatase, putative
AFUA_2G02770	5.40978	14.5501	36.639		0.371802	2.51812	LPXTG-motif cell wall anchor domain protein, putative
AFUA_2G02780	43.954	135.031	146.003		0.325511	1.08126	KH domain RNA-binding protein
AFUA_2G02810	38.094	17.8955	35.5688		2.12869	1.98759	alcohol dehydrogenase, zinc-containing, putative
AFUA_2G02820	92.8869	107.682	149.128		0.8626	1.38488	Yippee zinc-binding protein Moh1, putative
AFUA_2G02830	65.0101	58.0258	69.7229		1.12036	1.20158	conserved hypothetical protein
AFUA_2G02840	98.7804	187.078	135.662		0.528016	0.725161	TBC domain protein, putative
AFUA_2G02850	78.7143	46.825	50.592		1.68103	1.08045	serine/threonine protein kinase, putative
AFUA_2G02860	140.96	84.2346	81.25		1.67343	0.964568	F-box domain protein
AFUA_2G02870	16.2996	20.7062	41.0381		0.787184	1.98192	nuclear protein involved in pre-rRNA processing, putative
AFUA_2G02880	19.758	15.1352	25.1426		1.30544	1.66121	conserved hypothetical protein
AFUA_2G02890	114.308	99.5938	134.842		1.14774	1.35392	tRNA splicing 2' phosphotransferase 1
AFUA_2G02910	25.2707	21.6535	50.196		1.16705	2.31814	catechol dioxygenase, putative
AFUA_2G02920	108.941	63.7349	77.4564		1.70927	1.21529	alpha/beta hydrolase, putative
AFUA_2G02930	10.1083	19.685	30.9327		0.513501	1.57138	conserved hypothetical protein
AFUA_2G02950	465.937	136.505	143.908		3.41333	1.05423	aldehyde reductase, putative
AFUA_2G02960	29.8083	27.1855	53.7005		1.09648	1.97534	translation factor pelota, putative
AFUA_2G02970	9.11169	5.48963	19.6877		1.6598	3.58634	conserved hypothetical protein
AFUA_2G02980	36.6051	43.4352	75.0933		0.842752	1.72886	protein-ER retention receptor, putative
AFUA_2G02990	115.234	87.6968	354.974		1.31401	4.04774	MYB DNA-binding domain protein
AFUA_2G03000	12.4765	13.8583	38.8868		0.900293	2.80604	nucleoside transporter, putative
AFUA_2G03010	370.847	246.309	398.886		1.50562	1.61945	cytochrome c subunit Vb, putative
AFUA_2G03020	65.2605	53.9439	72.6017		1.20978	1.34587	MYB DNA-binding domain protein
AFUA_2G03030	25.7823	107.223	66.679		0.240455	0.621873	pre-mRNA splicing factor (Prp8), putative
AFUA_2G03040	265.224	177.043	427.695		1.49808	2.41577	ribosomal protein L34 protein, putative
AFUA_2G03050	2.80137	1.50025	7.39095		1.86727	4.92649	forkhead domain protein
AFUA_2G03060	17.9071	27.3999	96.7784		0.653546	3.53207	cactin, putative
AFUA_2G03070	10.8691	13.7372	16.6125		0.791218	1.20931	conserved hypothetical protein
AFUA_2G03080	18.6409	75.469	33.6744		0.247	0.446201	WD repeat protein
AFUA_2G03090	59.2618	109.705	88.7634		0.540194	0.809113	vacuolar ABC heavy metal transporter (Hmt1), putative
AFUA_2G03100	80.5221	49.2042	65.7431		1.63649	1.33613	conserved hypothetical protein
AFUA_2G03110	36.9085	28.4203	85.4885		1.29867	3.00801	alkaline phosphatase Pho8
AFUA_2G03120	31.1444	75.7874	157.578		0.410945	2.07922	cell wall glucanase (Utr2), putative
AFUA_2G03130	0.77756	6.24621	25.1127		0.124485	4.02047	conserved hypothetical protein
AFUA_2G03140	204.601	79.8311	167.526		2.56293	2.09851	peptide methionine sulfoxide reductase
AFUA_2G03150	30.1447	20.9675	34.4175		1.43769	1.64147	kinesin family protein
AFUA_2G03155	49.0649	43.0638	115.314		1.13935	2.67776	conserved hypothetical protein
AFUA_2G03160	15.8985	12.6137	25.7137		1.26041	2.03855	conserved hypothetical protein
AFUA_2G03170	52.5047	51.7666	57.4431		1.01426	1.10966	cyclic nucleotide-binding domain protein
AFUA_2G03180	50.8989	23.8119	33.3547		2.13754	1.40076	C6 finger domain protein, putative
AFUA_2G03190	176.08	182.309	259.867		0.965832	1.42542	conserved hypothetical protein
AFUA_2G03200	23.6026	17.4402	19.7062		1.35335	1.12993	conserved hypothetical protein
AFUA_2G03210	53.6271	41.0278	82.4755		1.30709	2.01024	conserved hypothetical protein
AFUA_2G03220	139.243	111.855	159.328		1.24485	1.42442	Bax Inhibitor family protein
AFUA_2G03230	5.75586	12.5583	19.0066		0.458331	1.51347	alpha-amylase AmyA
AFUA_2G03240	2.52707	24.3602	15.5186		0.103737	0.637047	hypothetical protein
AFUA_2G03250	1.21909	5.87583	12.7545		0.207475	2.17068	conserved hypothetical protein
AFUA_2G03260	36.6187	40.8557	88.1448		0.896292	2.15746	RNA binding protein (Rbm8A), putative
AFUA_2G03270	7.81316	8.1593	15.4603		0.957577	1.89481	glycosyl hydrolase, putative
AFUA_2G03280	71.9572	58.3545	71.0758		1.23311	1.218	bZIP transcription factor, putative
AFUA_2G03290	324.545	272.735	444.788		1.18996	1.63084	14-3-3 family protein ArtA, putative
AFUA_2G03300	327.075	294.643	419.741		1.11007	1.42458	conserved hypothetical protein
AFUA_2G03310	32.737	26.5748	47.0261		1.23188	1.76957	nucleoporin Nsp1, putative
AFUA_2G03320	271.23	94.5733	111.945		2.86793	1.18369	conserved hypothetical protein
AFUA_2G03330	17.4914	10.5892	25.9454		1.65182	2.45018	phytanoyl-CoA dioxygenase family protein
AFUA_2G03340	35.8242	42.4095	113.785		0.84472	2.68301	DUF652 domain protein
AFUA_2G03350	4.86043	9.28009	17.7836		0.523748	1.91632	MIZ zinc finger domain protein
AFUA_2G03360	111.313	85.1793	79.3312		1.30681	0.931343	polarized growth protein (Boi2), putative
AFUA_2G03370	41.6244	10.3577	19.6993		4.0187	1.90191	conserved hypothetical protein
AFUA_2G03380	261.552	130.936	295.716		1.99755	2.25847	alkaline serine protease
AFUA_2G03390	46.6536	57.3237	171.218		0.813862	2.98685	histone deacetylase RpdA/Rpd3
AFUA_2G03400	64.6208	59.5472	104.771		1.0852	1.75946	proteasome regulatory particle subunit (RpnK), putative
AFUA_2G03410	131.263	113.217	216.374		1.15939	1.91114	conserved hypothetical protein
AFUA_2G03420	70.0699	68.2483	118.251		1.02669	1.73265	mitochondrial translocase complex component (Tim50), putative
AFUA_2G03430	6.96122	9.69283	16.6244		0.718183	1.71513	C6 transcription factor, putative
AFUA_2G03440	2.23937	4.66384	9.50747		0.480156	2.03855	F-box domain protein
AFUA_2G03450	17.8522	27.9988	68.1559		0.637606	2.43424	conserved hypothetical protein
AFUA_2G03460	52.0231	77.727	110.954		0.669304	1.42748	C6 transcription factor (Leu3), putative
AFUA_2G03470	363.898	255.731	289.855		1.42297	1.13344	hypothetical protein
AFUA_2G03480	120.882	78.3107	63.6027		1.54361	0.812184	conserved hypothetical protein
AFUA_2G03490	409.151	199.306	177.661		2.05287	0.891394	calcium/calmodulin-dependent protein kinase, putative
AFUA_2G03500	33.4701	10.4242	13.1734		3.2108	1.26373	sugar transporter, putative
AFUA_2G03510	36.9566	14.8134	23.7211		2.4948	1.60132	pheromone processing carboxypeptidase (Sxa2), putative
AFUA_2G03520	4.19076	3.49117	7.20164		1.20039	2.06282	MFS monocarboxylate transporter, putative
AFUA_2G03540	4.54645	3.89569	7.11431		1.16705	1.8262	extracellular threonine rich protein, putative
AFUA_2G03560	10.1536	12.0405	29.4444		0.843285	2.44544	two-component osmosensing histidine kinase (Bos1), putative
AFUA_2G03580	20.5671	26.2846	57.4099		0.782477	2.18416	phenylalanyl-tRNA synthetase beta chain cytoplasmic
AFUA_2G03590	494.738	366.407	803.48		1.35024	2.19286	40S ribosomal protein S21
AFUA_2G03600	14.0637	8.66142	19.1921		1.62372	2.21581	NUDIX family hydrolase, putative
AFUA_2G03610	89.8103	102.844	126.091		0.873264	1.22603	IMP dehydrogenase, putative
AFUA_2G03620	42.0316	22.6607	25.4072		1.85483	1.1212	oxidoreductase, short-chain dehydrogenase/reductase family
AFUA_2G03630	141.214	73.6867	79.8835		1.91641	1.0841	conserved hypothetical protein
AFUA_2G03640	6.78888	2.22595	3.78142		3.04988	1.69879	Ras GTPase activating protein, putative
AFUA_2G03650	86.7367	74.0386	162.427		1.17151	2.19382	Golgi to endosome transport protein (Ent3), putative
AFUA_2G03670	61.546	17.9202	47.8384		3.43445	2.66953	hypothetical protein
AFUA_2G03680	17.9405	24.3782	36.5412		0.735926	1.49893	high osmolarity glycerol pathway protein Nbp2, putative
AFUA_2G03700	9.75972	20.2176	36.1994		0.482733	1.79049	HMG-CoA reductase
AFUA_2G03710	1.54521	11.8612	25.3042		0.130275	2.13337	cell polarity protein, putative
AFUA_2G03720	282.639	259.842	438.204		1.08773	1.68642	peptidyl-prolyl cis-trans isomerase
AFUA_2G03730	21.627	7.55356	6.84369		2.86315	0.906022	Ctr copper transporter family protein
AFUA_2G03740	34.5928	7.21785	12.2616		4.79267	1.69879	exosome complex endonuclease 1/ribosomal RNA processing protein, putative
AFUA_2G03750	11.5409	18.0267	17.9367		0.640208	0.995006	DNA excision repair protein (Rad26L), putative
AFUA_2G03760	75.8121	41.9537	109.205		1.80704	2.60299	transcription/RNA-processing factor Ssu72
AFUA_2G03770	40.0905	50.0967	120.642		0.800261	2.40818	isochorismatase family hydrolase, putative
AFUA_2G03780	94.3964	41.4535	89.3142		2.27716	2.15456	conserved hypothetical protein
AFUA_2G03790	161.239	69.1857	143.102		2.33053	2.06838	oxysterol binding protein (Osh7), putative
AFUA_2G03800	179.858	62.7206	156.018		2.8676	2.48752	hypothetical protein
AFUA_2G03810	15.1624	31.9478	38.6693		0.474599	1.21039	histone deacetylase HosA
AFUA_2G03820	14.6191	27.0846	34.1488		0.539759	1.26082	carboxyphosphonoenolpyruvate phosphonomutase, putative
AFUA_2G03840	46.5483	29.6209	33.8786		1.57147	1.14374	mitochondrial import receptor subunit (Tom37), putative
AFUA_2G03850	9.58888	14.3786	43.1822		0.666884	3.00322	conserved hypothetical protein
AFUA_2G03860	4.45449	5.13813	10.599		0.866949	2.06282	plasma membrane low affinity zinc ion transporter, putative
AFUA_2G03870	15.2747	16.3605	35.9674		0.933637	2.19844	FKBP-type peptidyl-prolyl isomerase, putative
AFUA_2G03880	15.0885	6.33762	21.8017		2.38078	3.44005	heme/steroid binding protein, putative
AFUA_2G03890	12.7683	7.64243	22.2076		1.67072	2.90583	Protein phosphatase 2C, putative
AFUA_2G03900	3.7788	4.85687	13.7513		0.778031	2.83132	acetamidase/formamidase family protein
AFUA_2G03910	3.3896	5.31614	7.04859		0.637606	1.32589	ATP-depentend DNA helicase, putative
AFUA_2G03920	21.8164	16.5128	21.965		1.32118	1.33019	G1/S-specific cyclin Cln1, putative
AFUA_2G03930	20.3614	13.032	32.5303		1.56241	2.49618	small nucleolar ribonucleoprotein complex subunit, putative
AFUA_2G03940	0.625254	4.68788	2.27535		0.133377	0.485369	hypothetical protein
AFUA_2G03950	102.465	211.572	142.788		0.484305	0.674889	serine/threonine protein phosphatase, putative
AFUA_2G03970	34.614	36.1071	56.9572		0.958646	1.57745	DUF52 domain protein
AFUA_2G03980	1.70844	1.82988	9.32573		0.933637	5.09637	alpha-1,3-glucanase/mutanase, putative
AFUA_2G03990	15.2684	38.613	75.2417		0.395423	1.94861	conserved hypothetical protein
AFUA_2G04000	27.9308	95.1616	77.9258		0.293509	0.818878	peptidase (PNG1), putative
AFUA_2G04010	134.187	128.297	335.662		1.04591	2.61628	alpha,alpha-trehalose-phosphate synthase subunit, putative
AFUA_2G04020	87.1138	69.2725	325.3		1.25755	4.69594	alpha,alpha-trehalose phosphate synthase subunit, putative
AFUA_2G04030	29.9017	42.2999	77.6759		0.706897	1.83631	chromatin assembly factor 1 subunit B, putative
AFUA_2G04040	39.1774	29.8577	64.0879		1.31214	2.14645	conserved hypothetical protein
AFUA_2G04050	14.1719	14.6896	30.3614		0.964759	2.06686	conserved hypothetical protein
AFUA_2G04060	2.27031	3.12645	10.3273		0.726162	3.3032	NADH:flavin oxidoreductase/NADH oxidase family protein
AFUA_2G04070	4.33212	17.4002	11.0847		0.24897	0.637047	MFS transporter, putative
AFUA_2G04080	54.6249	353.196	43.8495		0.154659	0.12415	GPR/FUN34 family protein
AFUA_2G04090	59.0714	53.1276	71.3817		1.11188	1.34359	hypothetical protein
AFUA_2G04100	31.2191	34.4831	37.2779		0.905345	1.08105	hypothetical protein
AFUA_2G04110	28.6346	34.9296	56.0818		0.819779	1.60556	ENTH domain protein
AFUA_2G04120	3.73751	2.54748	9.58261		1.46714	3.76161	conserved hypothetical protein
AFUA_2G04130	361.157	242.226	556.137		1.49099	2.29594	40S ribosomal protein S11
AFUA_2G04140	3.26575	4.16414	8.06437		0.784255	1.93662	chromosome segregation protein Spc105, putative
AFUA_2G04150	31.0921	16.4367	25.6158		1.89163	1.55846	C6 transcription factor, putative
AFUA_2G04160	3.00742	5.36865	20.9765		0.560182	3.90722	hypothetical protein
AFUA_2G04170	62.9189	104.291	114.671		0.603304	1.09954	conserved hypothetical protein
AFUA_2G04190	8.93423	27.6037	34.3881		0.323661	1.24578	conserved hypothetical protein
AFUA_2G04200	40.8334	276.887	89.0484		0.147474	0.321606	4-hydroxyphenylpyruvate dioxygenase, putative
AFUA_2G04210	9.91162	44.4866	19.7522		0.2228	0.444002	conserved hypothetical protein
AFUA_2G04220	62.267	54.5669	47.5751		1.14111	0.871866	homogentisate 1,2-dioxygenase (HmgA), putative
AFUA_2G04230	12.9161	15.3379	23.7569		0.842104	1.5489	fumarylacetoacetate hydrolase FahA
AFUA_2G04240	5.22842	18.4802	31.394		0.28292	1.69879	maleylacetoacetate isomerase MaiA
AFUA_2G04262	71.5812	56.8947	25.0471		1.25813	0.440235	C6 transcription factor, putative
AFUA_2G04270	165.906	176.861	144.529		0.938062	0.817191	mitochondrial inner membrane translocase subunit (TIM17), putative
AFUA_2G04280	26.2553	26.9966	42.2787		0.972539	1.56607	asparaginase, putative
AFUA_2G04290	72.7796	40.5259	53.2536		1.79588	1.31406	cytochrome P450 monooxygenase, putative
AFUA_2G04300	11.9802	8.34062	21.2535		1.43637	2.54819	lipase/esterase, putative
AFUA_2G04310	380.769	129.921	141.053		2.93077	1.08568	argininosuccinate synthase
AFUA_2G04320	1717.74	611.738	453.186		2.80796	0.740817	NADH-dependent flavin oxidoreductase, putative
AFUA_2G04330	13.4143	16.5076	40.5066		0.81261	2.45381	#N/A
AFUA_2G04350	44.2045	47.9102	41.1735		0.922653	0.859388	conserved hypothetical protein
AFUA_2G04360	24.0843	26.3336	29.5572		0.914584	1.12242	#N/A
AFUA_2G04380	15.5198	6.12423	7.80284		2.53416	1.27409	LaeA-like methyltransferase, putative
AFUA_2G04390	9.84458	12.3017	21.2179		0.800261	1.72479	cytomegalovirus gH-receptor family protein, putative
AFUA_2G04400	12.4077	7.14071	25.7775		1.7376	3.60993	conserved hypothetical protein
AFUA_2G04420	0.803307	1.89289	16.9551		0.424381	8.95726	integral membrane protein
AFUA_2G04430	65.6346	46.8072	73.0154		1.40223	1.55992	DUF21 and CBS domain protein (Mam3), putative
AFUA_2G04440	39.883	35.9419	45.0427		1.10965	1.25321	C2H2 finger domain protein, putative
AFUA_2G04450	35.3563	52.6288	68.4561		0.671805	1.30073	HECT domain protein
AFUA_2G04460	163.776	77.3899	128.282		2.11624	1.65761	conserved hypothetical protein
AFUA_2G04470	55.9462	27.0448	36.0341		2.06865	1.33239	conserved hypothetical protein
AFUA_2G04480	14.634	4.8764	10.9467		3.00098	2.24483	xylosidase/arabinosidase, putative
AFUA_2G04490	19.8351	14.5038	34.5292		1.36758	2.3807	D-3-phosphoglycerate dehydrogenase
AFUA_2G04500	9.90199	5.30291	11.2607		1.86727	2.12349	hypothetical protein
AFUA_2G04510	9.86538	4.3227	9.99514		2.28222	2.31224	cysteine-binding protein FliY, putative
AFUA_2G04520	15.8756	11.9559	35.6565		1.32784	2.98232	Fe-containing alcohol dehydrogenase, putative
AFUA_2G04533	3.40728	2.18968	3.09985		1.55606	1.41566	Bys1 family protein
AFUA_2G04535	9.0122	4.17418	12.4093		2.15904	2.97288	conserved hypothetical protein
AFUA_2G04540	82.5296	32.8915	61.4633		2.50915	1.86867	conserved hypothetical protein
AFUA_2G04550	10.8518	8.52366	12.5054		1.27314	1.46714	MFS sugar transporter, putative
AFUA_2G04560	8.43472	2.58122	10.2315		3.26773	3.96385	oxidoreductase, short-chain dehydrogenase/reductase family
AFUA_2G04570	6.48659	10.0741	24.7855		0.643888	2.46032	BNR/Asp-box repeat domain protein
AFUA_2G04580	4.25612	9.11728	18.7151		0.466819	2.05271	hypothetical protein
AFUA_2G04590	41.4439	35.3674	91.349		1.17181	2.58286	alcohol dehydrogenase, putative
AFUA_2G04600	24.6389	20.0464	45.4781		1.22909	2.26864	C6 transcription factor, putative
AFUA_2G04610	347.853	226.847	387.117		1.53343	1.70651	DUF967 domain protein
AFUA_2G04620	21.2679	37.6443	82.8069		0.56497	2.19972	Hsp70 chaperone BiP/Kar2, putative
AFUA_2G04630	65.2341	59.2454	80.6805		1.10108	1.3618	#N/A
AFUA_2G04650	16.9987	18.4317	31.1207		0.922252	1.68843	PAB-dependent poly(A)-specific ribonuclease subunit (Pan2), putative
AFUA_2G04670	54.5329	55.5219	93.7542		0.982187	1.6886	SH3 domain protein
AFUA_2G04680	31.3654	39.1674	69.783		0.800803	1.78166	sexual development serine/threonine kinase PakA
AFUA_2G04690	2.15324	0.256255	2.8296		8.40274	11.0421	nucleoside transporter, putative
AFUA_2G04700	28.9601	14.9642	27.1888		1.93529	1.81692	RNA binding effector protein Scp160, putative
AFUA_2G04710	73.4473	26.8186	45.053		2.73867	1.67992	cytochrome b5, putative
AFUA_2G04720	30.8444	40.3002	35.5244		0.765366	0.881495	ubiquitin C-terminal hydrolase, putative
AFUA_2G04740	69.6225	69.588	87.9813		1.0005	1.26432	vacuolar sorting-associated protein (Vps27), putative
AFUA_2G04750	10.1239	23.0926	34.7949		0.438404	1.50675	conserved hypothetical protein
AFUA_2G04760	16.1879	34.9909	33.253		0.462632	0.950333	BTB domain and ankyrin repeat protein
AFUA_2G04770	102.832	106.078	70.6545		0.969409	0.666065	autophagy protein Atg13, putative
AFUA_2G04780	9.91227	11.8765	30.5691		0.834615	2.57393	WD repeat protein
AFUA_2G04790	8.65212	7.17747	17.9037		1.20546	2.49443	conserved hypothetical protein
AFUA_2G04800	23.3038	20.4802	56.5363		1.13787	2.76054	pre-rRNA processing protein, putative
AFUA_2G04820	61.7493	59.9776	91.4234		1.02954	1.52429	translation release factor eRF3, putative
AFUA_2G04830	28.8528	28.5911	54.1059		1.00915	1.8924	RanGTP-binding protein
AFUA_2G04840	57.1167	35.3184	51.1595		1.61719	1.44852	BSD domain protein
AFUA_2G04850	6.46191	4.15273	13.7733		1.55606	3.31669	conserved hypothetical protein
AFUA_2G04860	33.8633	29.6113	43.2031		1.14359	1.45901	DNA repair protein Rad4, putative
AFUA_2G04870	110.211	189.663	103.935		0.581087	0.547997	pyruvate dehydrogenase E1 component alpha subunit, putative
AFUA_2G04880	742.31	539.673	782.857		1.37548	1.45061	cell wall biogenesis protein, putative
AFUA_2G04890	2.14689	0.766497	5.20847		2.80091	6.79516	TAM domain methyltransferase, putative
AFUA_2G04900	15.9266	15.8525	27.5155		1.00468	1.73572	conserved hypothetical protein
AFUA_2G04910	154.623	96.6081	145.927		1.60052	1.5105	proteasome component Pup1, putative
AFUA_2G04920	20.4233	9.47619	24.9746		2.15522	2.63551	nuclear pore complex subunit Nup159, putative
AFUA_2G04930	506.129	157.515	137.699		3.21321	0.874195	conserved hypothetical protein
AFUA_2G04940	63.6495	82.982	56.0079		0.767029	0.674941	KH domain RNA binding protein
AFUA_2G04950	17.1812	12.1456	32.5124		1.4146	2.67688	conserved hypothetical protein
AFUA_2G04960	37.7703	17.1955	18.9099		2.19653	1.0997	RecQ family helicase MusN
AFUA_2G04970	14.1965	9.04637	13.0791		1.56931	1.44578	Kelch repeats protein, putative
AFUA_2G04980	10.7662	7.43139	17.6306		1.44875	2.37245	tyrosine decarboxylase, putative
AFUA_2G05000	31.8074	38.3989	47.8203		0.82834	1.24535	proline iminopeptidase
AFUA_2G05010	49.3785	30.4683	46.388		1.62065	1.5225	conserved hypothetical protein
AFUA_2G05020	14.692	10.6201	18.8972		1.38342	1.77939	cellular morphogenesis regulator DopA
AFUA_2G05030	22.4002	35.3096	64.2133		0.634395	1.81858	HIT finger domain protein, putative
AFUA_2G05040	0.962693	2.26847	5.25498		0.424381	2.31653	glycerol:H+ symporter (Gup1), putative
AFUA_2G05050	28.541	16.8133	31.1589		1.69752	1.85323	hypothetical protein
AFUA_2G05060	9.27785	5.52073	17.8193		1.68055	3.2277	alternative oxidase AlxA, putative
AFUA_2G05070	2.63174	5.89386	13.2774		0.446522	2.25274	conserved hypothetical protein
AFUA_2G05080	2.14961	1.97349	7.63635		1.08924	3.86947	conserved hypothetical protein
AFUA_2G05085	5.97307	3.44488	12.1223		1.7339	3.51892	acetyltransferase, GNAT family, putative
AFUA_2G05090	79.1714	79.3531	83.9223		0.997711	1.05758	ACN9 family domain containing protein, putative
AFUA_2G05100	10.9443	8.30324	15.7649		1.31808	1.89865	conserved hypothetical protein
AFUA_2G05110	134.331	136.364	335.624		0.985098	2.46124	small nuclear ribonucleoprotein SmD1, putative
AFUA_2G05115	58.3866	38.2977	21.8238		1.52455	0.569848	conserved hypothetical protein
AFUA_2G05120	17.1401	20.3355	31.6669		0.842867	1.55723	conserved hypothetical protein
AFUA_2G05140	5.39814	2.2107	6.49994		2.44182	2.94022	ankyrin repeat protein
AFUA_2G05150	12.4987	8.77846	14.1671		1.4238	1.61385	cell wall galactomannoprotein Mp2/allergen F17-like
AFUA_2G05180	2.47033	16.6218	14.5795		0.14862	0.877131	NF-X1 finger and helicase domain protein, putative
AFUA_2G05190	33.417	40.9054	66.1337		0.816933	1.61675	MFS monosaccharide transporter, putative
AFUA_2G05200	104.069	93.75	155.5		1.11007	1.65866	ER membrane protein (Pkr1), putative
AFUA_2G05210	6.23438	5.37105	21.9476		1.16074	4.08628	anaphase-promoting complex subunit ApcB, putative
[truncated: 6,956 more rows]
