# Supplementary material for: Temperature during conidiation affects stress tolerance, pigmentation, and trypacidin accumulation in the conidia of the airborne pathogen Aspergillus fumigatus
Source: PLoS One. 2017 May 9;12(5):e0177050. doi: 10.1371/journal.pone.0177050 (PMC5423626; doi:10.1371/journal.pone.0177050)
Supplement: S2 Table — (XLSX) [file pone.0177050.s003.xlsx]

## Sheet: Sheet1
Table S2. FPKM list for the allergenic genes
		FPKM				Ratio
Feature ID	Asp F number	Conidia at 25℃	Conidia at 37℃	Conidia at 45℃		25/37	45/37	Annotation
AFUA_5G02330	AspF1	13.7061	16.1484	29.3032		0.848761	1.81462	major allergen and cytotoxin AspF1
AFUA_4G09580	AspF2	3.18162	3.40777	8.32182		0.933637	2.44201	major allergen Asp F2
AFUA_6G02280	AspF3	139.961	129.152	204.384		1.08369	1.5825	allergen Asp F3
AFUA_2G03830	AspF4	0	0	1.02496		#DIV/0!	#DIV/0!	allergen Asp F4
AFUA_8G07080	AspF5	0.382045	0	1.04272		#DIV/0!	#DIV/0!	elastinolytic metalloproteinase Mep
AFUA_1G14550	AspF6	117.275	45.5648	79.4971		2.57381	1.7447	Mn superoxide dismutase MnSOD
AFUA_4G06670	AspF7	3.58079	3.3559	39.0924		1.06701	11.6489	allergen Asp F7
AFUA_2G10100	AspF8	671.478	370.044	688.73		1.81459	1.86121	60S acidic ribosomal protein P2/allergen Asp F 8
AFUA_1G16190	AspF9	5.81992	18.7008	43.473		0.311212	2.32466	extracellular cell wall glucanase Crf1/allergen Asp F9
AFUA_5G13300	AspF10	7.9641	1.9685	8.63886		4.04576	4.38854	aspartic endopeptidase Pep1/aspergillopepsin F
AFUA_2G03720	AspF11	282.639	259.842	438.204		1.08773	1.68642	peptidyl-prolyl cis-trans isomerase
AFUA_5G04170	AspF12	266.275	314.053	1245.9		0.847867	3.96716	molecular chaperone and allergen Mod-E/Hsp90/Hsp1
AFUA_4G11800	AspF13	18.0148	35.053	61.4598		0.513929	1.75334	alkaline serine protease Alp1
AFUA_2G12630	AspF15	29.3338	30.5697	65.6357		0.959572	2.14708	allergenic cerato-platanin Asp F13
AFUA_4G03240	AspF17	11.0659	14.1318	22.8453		0.783051	1.61659	cell wall serine-threonine-rich galactomannoprotein Mp1
AFUA_5G09210	AspF18	192.465	326.637	374.449		0.589232	1.14638	autophagic serine protease Alp2
AFUA_6G06770	AspF22	332.951	131.401	185.768		2.53386	1.41375	enolase/allergen Asp F 22
AFUA_2G11850	AspF23	431.184	269.76	594.735		1.5984	2.20468	60S ribosomal protein L3
AFUA_3G07430	AspF27	2026.59	940.345	1205.83		2.15515	1.28232	peptidyl-prolyl cis-trans isomerase/cyclophilin, putative
AFUA_6G10300	AspF28	172.49	133.497	240.958		1.29209	1.80497	thioredoxin, putative
AFUA_5G11320	AspF29	1687.26	853.267	855.993		1.97742	1.0032	thioredoxin TrxA
AFUA_3G03060	AspF34	0	0	0.593304		#DIV/0!	#DIV/0!	cell wall protein PhiA
