# Supplementary material for: Temperature during conidiation affects stress tolerance, pigmentation, and trypacidin accumulation in the conidia of the airborne pathogen Aspergillus fumigatus
Source: PLoS One. 2017 May 9;12(5):e0177050. doi: 10.1371/journal.pone.0177050 (PMC5423626; doi:10.1371/journal.pone.0177050)
Supplement: S3 Table — (XLSX) [file pone.0177050.s004.xlsx]

## Sheet: Sheet1
Table S3 FPKM list for the genes that were coordinately regulated
	FPKM				Ratio
Gene ID	Conidia at 25℃	Conidia at 37℃	Conidia at 45℃		25/37	45/37	Annotation
Cluster a
AFUA_4G14450	82.4739	59.4073	22.8168		1.38828	0.384075	mannitol dehydrogenase, putative
AFUA_4G14460	2001.82	58.4646	21.3812		34.2399	0.365712	conserved hypothetical protein
AFUA_4G14470	1073.03	34.5245	8.48881		31.0803	0.245878	hypothetical protein
AFUA_4G14480	1253.43	40.0991	7.49321		31.2582	0.186867	conserved hypothetical protein
AFUA_4G14490	799.382	20.4466	4.34182		39.0961	0.212349	extracellular dihydrogeodin oxidase/laccase, putative
AFUA_4G14500	454.736	15.7304	3.21661		28.9082	0.204484	conserved hypothetical protein
AFUA_4G14510	3137.07	95.0307	23.7867		33.0111	0.250305	hypothetical protein
AFUA_4G14520	509.09	14.2717	11.7043		35.6714	0.820106	toxin biosynthesis protein, putative
AFUA_4G14530	1173.81	56.9124	64.4549		20.6249	1.13253	glutathione S-transferase Ure2-like, putative
AFUA_4G14540	151.853	7.85418	15.2884		19.3341	1.94653	C6 transcription factor (AflR), putative
AFUA_4G14550	434.794	22.5434	51.6499		19.287	2.29113	toxin biosynthesis regulatory protein AflJ, putative
AFUA_4G14560	270.559	9.32693	4.51816		29.0084	0.484421	polyketide synthase, putative
AFUA_4G14570	1091.12	28.3241	7.3221		38.5227	0.258512	metallo-beta-lactamase domain protein, putative
AFUA_4G14580	1132.38	27.9748	12.3378		40.4786	0.441032	O-methyltransferase, putative
AFUA_4G14590	6.11126	0.793412	5.39137		7.70251	6.79516	C6 transcription factor, putative
AFUA_4G14600	44.8836	14.3005	8.52857		3.13861	0.596384	UPF0075 domain protein
AFUA_4G14610	13.5027	17.596	16.3791		0.767373	0.930844	MFS sugar transporter, putative
AFUA_4G14620	347.725	539.895	234.606		0.64406	0.434539	RING finger protein
AFUA_4G14630	260.271	861.84	150.306		0.301995	0.174402	FAD binding oxidoreductase, putative
Cluster b
AFUA_3G00610	365.267	133.274	17.7991		2.74072	0.133553	glucan 1,4-alpha-glucosidase, putative
AFUA_3G00620	402.539	143.957	11.3106		2.79624	0.0785691	zinc-containing alcohol dehydrogenase, putative
AFUA_3G00630	44.1088	58.5182	23.2565		0.753762	0.397424	conserved hypothetical protein
AFUA_3G00640	678.528	1419.45	325.39		0.478022	0.229237	conserved hypothetical protein
Cluster c
AFUA_7G04920	75823.2	85516.2	377.946		0.886653	0.00441959	hypothetical protein
AFUA_7G04930	10561.8	8098.54	240.722		1.30417	0.0297241	alkaline serine protease (PR1)/allergen F18-like
AFUA_7G04940	22.6151	597.858	5.61125		0.0378269	0.00938559	conserved hypothetical protein
AFUA_7G04950	728.656	416.485	78.2656		1.74954	0.187919	lipase, putative
AFUA_7G04960	18.8014	29.8819	12.139		0.62919	0.406233	N-acetyltransferase, GNAT family, putative
