# Supplementary material for: Temperature during conidiation affects stress tolerance, pigmentation, and trypacidin accumulation in the conidia of the airborne pathogen Aspergillus fumigatus
Source: PLoS One. 2017 May 9;12(5):e0177050. doi: 10.1371/journal.pone.0177050 (PMC5423626; doi:10.1371/journal.pone.0177050)
Supplement: S4 Table — (XLSX) [file pone.0177050.s005.xlsx]

## Sheet: strain
Table S4, Strains used in this study
	Strain	Genotype	Source/bakcground	Ref.
	Af293	wild-type	Clinical	Xue et al. (2004)
	DtpcC	tpcC::hygB	Af293	This study
	IFM 59056	wild-type	Clinical	Takahashi-Nakaguchi et al. (2015)
	IFM 59359	wild-type	Clinical	Takahashi-Nakaguchi et al. (2015)
	IFM 60237	wild-type	Clinical	Takahashi-Nakaguchi et al. (2015)
	IFM 59365	wild-type	Clinical	Takahashi-Nakaguchi et al. (2015)
	IFM 59073	wild-type	Clinical	Takahashi-Nakaguchi et al. (2015)
	IFM 60514	wild-type	Clinical	Takahashi-Nakaguchi et al. (2015)
	IFM 61407	wild-type	Clinical	Takahashi-Nakaguchi et al. (2015)
	IFM 61610	wild-type	Clinical	Takahashi-Nakaguchi et al. (2015)
