# Supplementary material for: Temperature during conidiation affects stress tolerance, pigmentation, and trypacidin accumulation in the conidia of the airborne pathogen Aspergillus fumigatus
Source: PLoS One. 2017 May 9;12(5):e0177050. doi: 10.1371/journal.pone.0177050 (PMC5423626; doi:10.1371/journal.pone.0177050)
Supplement: S5 Table — (XLSX) [file pone.0177050.s006.xlsx]

## Sheet: primers
Table S5, Primer sequences used in this study
	primer name	sequence (5' to 3')
	hygBr-F	TTTTTGGGCTTGGCTGGAGCTAGTGG
	hygBr-R	TGGTTCCCGGTCGGCATCTACTCTATTC
	tpcC-U-F(pUC119)	CAGGTCGACTCTAGAGTTGCTGGACGGTGACGCTGCCTTTCC
	tpcC-U-R(hygBr)	CTCCAGCCAAGCCCAAAAAcagatacgggaagtcggagaggg
	tpcC-D-F(hygBr)	GATGCCGACCGGGAACCAGGCTGCTGTCTTCGATTTTGTCGG
	tpcC-D-R(pUC119)	GTAAAACGACGGCCAGTGggccgcccagctctcggatttgc
	tpcC-U-F	TTGCTGGACGGTGACGCTGCCTTTCC
	RT-pksP-F	GAGGATCTCCATCGCCTCTATCTC
	RT-pksP-R	CGACGATAGTATGGTTCTTCGCCTGC
	RT-arp1-F	GGTCGAAAAGAAGCCCAATCTGACACTCG
	RT-arp1-R	CATAGCTGTCTGCCCAGTCAAAGAGG
	RT-arp2-F	GGTGAACACCTGCACCTATCTCCCCC
	RT-arp2-R	GCCCCGCGACGGGCCAGTTCGAGGGC
	RT-tpcC-F	GAGGCCAGTAGACTTTACCCCCTCGTC
	RT-tpcC-R	GTCGTCGACAGATGCCTTGGATGCC
	RT-actin-F	CTGTGCAGATTGTCGCCAGGG
	RT-actin-R	GTCCAGATTAAGCTGTCGCGC
